# Supplementary material for: Is maternal weight gain between pregnancies associated with risk of large-for-gestational age birth? Analysis of a UK population-based cohort
Source: PubMed Central journal article supplement (PMC6615839; doi:10.1136/bmjopen-2018-026220), 2019-07-09
Supplement: bmjopen-2018-026220.draft_revisions.pdf [file bmjopen-2018-026220.draft_revisions.pdf]

# BMJ Open

BMJ Open is committed to open peer review. As part of this commitment we make the peer review history of every article we publish publicly available.

When an article is published we post the peer reviewers' comments and the authors' responses online. We also post the versions of the paper that were used during peer review. These are the versions that the peer review comments apply to.

The versions of the paper that follow are the versions that were submitted during the peer review process. They are not the versions of record or the final published versions. They should not be cited or distributed as the published version of this manuscript.

BMJ Open is an open access journal and the full, final, typeset and author-corrected version of record of the manuscript is available on our site with no access controls, subscription charges or pay-per-view fees (<http://bmjopen.bmj.com>).

If you have any questions on BMJ Open's open peer review process please email [info.bmjopen@bmj.com](mailto:info.bmjopen@bmj.com)

# BMJ Open

## Is maternal weight gain between pregnancies associated with risk of large-for-gestational age birth? Analysis of a UK population-based cohort

|                               |                                                                                                                                                                                                                                                                                                                                                                                                                                                                                                                                                                                                                                                                                                                                                                           |
|-------------------------------|---------------------------------------------------------------------------------------------------------------------------------------------------------------------------------------------------------------------------------------------------------------------------------------------------------------------------------------------------------------------------------------------------------------------------------------------------------------------------------------------------------------------------------------------------------------------------------------------------------------------------------------------------------------------------------------------------------------------------------------------------------------------------|
| Journal:                      | <i>BMJ Open</i>                                                                                                                                                                                                                                                                                                                                                                                                                                                                                                                                                                                                                                                                                                                                                           |
| Manuscript ID                 | bmjopen-2018-026220                                                                                                                                                                                                                                                                                                                                                                                                                                                                                                                                                                                                                                                                                                                                                       |
| Article Type:                 | Research                                                                                                                                                                                                                                                                                                                                                                                                                                                                                                                                                                                                                                                                                                                                                                  |
| Date Submitted by the Author: | 24-Aug-2018                                                                                                                                                                                                                                                                                                                                                                                                                                                                                                                                                                                                                                                                                                                                                               |
| Complete List of Authors:     | Ziauddeen, Nida; University of Southampton, Academic unit of Primary Care and Population Sciences, Faculty of Medicine<br>Wilding, Sam; University of Southampton, Academic unit of Primary Care and Population Sciences, Faculty of Medicine<br>Roderick, Paul; University of Southampton, Academic unit of Primary Care and Population Sciences, Faculty of Medicine<br>Macklon, Nick; University of Copenhagen, Zealand University Hospital, Department of Obstetrics and Gynaecology; London Women's Clinic<br>Alwan, Nisreen; University of Southampton, Academic unit of Primary Care and Population Sciences, Faculty of Medicine; University of Southampton and University Hospital Southampton NHS Foundation Trust, NIHR Southampton Biomedical Research Centre |
| Keywords:                     | obesity, pregnancy, pregnancy outcome, weight gain, birth weight                                                                                                                                                                                                                                                                                                                                                                                                                                                                                                                                                                                                                                                                                                          |
|                               |                                                                                                                                                                                                                                                                                                                                                                                                                                                                                                                                                                                                                                                                                                                                                                           |

SCHOLARONE™  
Manuscripts

Only

1  
2  
3 **Is maternal weight gain between pregnancies associated with risk of large-for-**  
4 **gestational age birth? Analysis of a UK population-based cohort**  
5

6  
7 Nida Ziauddeen<sup>1</sup>, Sam Wilding<sup>1</sup>, Paul J. Roderick<sup>1</sup>, Nicholas S. Macklon<sup>2,3</sup>, Nisreen A.  
8 Alwan<sup>1,4</sup>  
9

10  
11 <sup>1</sup> Academic Unit of Primary Care and Population Sciences, Faculty of Medicine, University of  
12 Southampton, Southampton, UK  
13

14 <sup>2</sup> Department of Obstetrics and Gynaecology, University of Copenhagen, Zealand University  
15 Hospital, Roskilde 4000, Denmark  
16

17 <sup>3</sup> London Women's Clinic, 113-115 Harley Street, London W1G 6AP  
18

19 <sup>4</sup> NIHR Southampton Biomedical Research Centre, University of Southampton and  
20 University Hospital Southampton NHS Foundation Trust, Southampton SO16 6YD, UK  
21  
22

23  
24  
25 Author emails: N.Ziauddeen@soton.ac.uk, S.A.Wilding@soton.ac.uk, pjr@soton.ac.uk,  
26 nism@regionsjaelland.dk, N.A.Alwan@soton.ac.uk  
27  
28  
29  
30

31 Corresponding author: Nida Ziauddeen  
32

33 Academic Unit of Primary Care and Population Sciences, Faculty of Medicine, Mailpoint 805,  
34 Level C (AC22), South Academic Block, Southampton General Hospital, Tremona Road,  
35 Southampton SO16 6YD, UK  
36  
37

38 Email: N.Ziauddeen@soton.ac.uk  
39

40 Telephone number: 023 81 206287  
41  
42  
43  
44  
45  
46

47 **Keywords:** obesity, pregnancy, pregnancy outcome, weight gain, birth weight  
48

49 **Word count:** 3924 words  
50  
51  
52  
53  
54  
55  
56  
57  
58  
59  
60

## Abstract

**Objective:** Maternal obesity during pregnancy increases the risk of large-for-gestational age (LGA) infant and childhood obesity. The aim was to investigate the association between maternal weight change between subsequent pregnancies and risk of having a LGA baby.

**Design:** Population-based cohort.

**Setting:** Routinely collected antenatal healthcare data between January 2003 and September 2017 at University Hospital Southampton, England.

**Participants:** Records of women with their first two consecutive singleton live-birth pregnancies were analysed (n=15940).

**Primary outcome measure:** Risk of LGA, recurrent LGA and 'new' LGA births in the second pregnancy.

**Results:** Of the 15940 women included, 16.0% lost and 47.7% gained weight ( $\geq 1$  body mass index (BMI) unit) between pregnancies. A lower proportion of babies born to women who lost  $\geq 1$  BMI unit (12.4%) and remained weight stable between -1 to 1 BMI unit (11.9%) between pregnancies were LGA compared to 14.5% in women who gained  $\geq 1$  BMI unit (adjusted odds ratio (aOR) of LGA for weight gain compared to weight stable 1.24, 95% CI 1.11 to 1.39,  $P < 0.001$ ). Normal- and over-weight women who gained weight were at increased risk of LGA after having a non-LGA baby in the first pregnancy (aOR 1.37, 95% CI 1.16 to 1.61,  $p < 0.001$  in normal weight and aOR 1.30, 95% CI 1.02 to 1.65,  $p = 0.03$  in overweight). Overweight women who had a LGA baby in the first pregnancy were at lower risk of LGA in the second pregnancy if they lost  $\geq 1$  BMI unit (aOR 0.44, 95% CI 0.23 to 0.85,  $p = 0.02$ ).

**Conclusions:** Losing weight after an LGA birth in overweight women reduces the risk of subsequent LGA in the next pregnancy, while gaining weight increases its risk in women with no previous history of LGA. Preventing weight gain between pregnancies is an important prevention measure to achieve better maternal and offspring outcomes.

## Article summary

### Strengths and limitations of this study

- Utilises data from a large population-based cohort including women from all socioeconomic backgrounds
- Data is collected as part of routine care during pregnancy
- Objective measurement of exposure and outcome
- Self-reported data for confounders
- Lack of information on weight gain during pregnancy

## Introduction

Maternal obesity has shown a significant increase over time, having more than doubled in England between 1989 to 2007 (7.6% to 15.6%), with the rate of normal weight pregnancies showing a 12% decrease from 65.6% to 53.6%<sup>1</sup>. Maternal overweight and obesity is a key risk factor for maternal and foetal outcomes. It also increases the risk of long-term health problems in the child including obesity, cardiovascular disease, diabetes and cognitive and behavioural disorders<sup>2</sup>. Change in maternal body mass index (BMI) between pregnancies could modify the risk in the subsequent pregnancy.

Birthweight is a key early life predictor of long-term health outcomes such as obesity and cardiovascular disease<sup>3</sup>. The incidence of large-for-gestational age (LGA) birth, defined as >90th percentile weight for gestational age, has increased over time in high-income countries<sup>4,5</sup>. A key risk factor for LGA birth is gestational diabetes mellitus<sup>8</sup>, the incidence of which has also increased over time<sup>6,7</sup>. LGA has been found to be associated with childhood obesity prevalence at age 7 years<sup>9,10</sup> and into adulthood<sup>11-13</sup>. Offspring of mothers with gestational diabetes have increased risk of overweight and obesity at age 7 years<sup>14,15</sup>. Maternal obesity is a known risk factor for both gestational diabetes and LGA birth<sup>16</sup>.

Birthweight increases with parity such that the first-born infant on average has the lowest birthweight and the birthweight of subsequent infants increases<sup>17-19</sup> up to the fourth pregnancy<sup>20</sup>. However, birthweight was found to decrease with parity for women who had short intervals between pregnancies and the increase in birthweight with parity was higher in women with long intervals<sup>20</sup>. Women who returned to their pre-pregnancy weight before the next conception had subsequent born infants who weighed less than infants of women who retained or gained weight between pregnancies<sup>20</sup>. Women who lost at least six kilograms by their second pregnancy had a smaller average increase in birthweight compared to women who gained ten kg or more<sup>18</sup>.

A large US study showed that women were at an increased risk of having an LGA baby in the second pregnancy if their pre-pregnancy BMI category increased towards overweight or obese from first to second pregnancy regardless of their BMI category in first pregnancy, except in underweight women whose weight increases to become within the normal range. In this study, overweight and obese women who dropped BMI category by their second pregnancy remained at an increased risk of LGA birth, but had a lower risk compared to women whose BMI category increased between pregnancies<sup>21</sup>.

Another US-based study showed that inter-pregnancy weight gain of  $\geq 2$  BMI units in women who were obese in their first pregnancy was associated with increased risk of LGA. Weight loss of  $\geq 2$  BMI units was associated with lower risk compared to the reference group of weight maintained between 2 BMI units adjusted for LGA birth in previous pregnancy and other confounders<sup>22</sup>.

Three studies assessed weight change between first and second pregnancy in relation to 'new' LGA incidence in the second pregnancy, stratified by BMI category ( $<$  or  $\geq 25$ )<sup>23-25</sup>. Two studies found a reduced risk of 'new' LGA with between pregnancy weight loss of  $>1$  BMI unit and an increased risk with modest (1-3 BMI units) and large ( $\geq 3$  BMI units) weight gain. The effect remained in both BMI categories after stratification ( $<$  or  $\geq 25$ ) but was stronger in women with a healthy first pregnancy BMI ( $< 25 \text{ kg/m}^2$ ). The third study only found an increased risk in normal weight women who gained  $\geq 4$  BMI units between pregnancies and no association in overweight women<sup>25</sup>.

Only one published study has examined the risk of recurrent LGA (in both first and second pregnancies) in relation to maternal weight change between pregnancies<sup>26</sup>. The study, which was conducted in Aberdeen, Scotland, included 24520 women of which 813 women had LGA births in both pregnancies, and found that inter-pregnancy weight gain ( $\geq 2$  BMI

units) was associated with increased risk of recurrent LGA, while weight loss ( $\geq 2$  BMI units) was found to be protective. Women with healthy weight ( $\text{BMI} < 25 \text{ kg/m}^2$ ) were at increased risk of recurrent LGA on gaining weight whereas overweight women ( $\text{BMI} \geq 25 \text{ kg/m}^2$ ) were at reduced risk of recurrent LGA on losing weight<sup>26</sup>.

We aimed to investigate the association of the incidence of LGA, recurrent LGA and 'new' LGA births in the second pregnancy with maternal change in BMI between the first and second pregnancies in a population-based cohort in the South of England.

## Methods

This is a population-based cohort of prospectively collected routine healthcare data for antenatal care between January 2003 and September 2017 at University Hospital Southampton, Hampshire, UK. This included all women delivering at this hospital, which is a regional centre for maternity care in and around Southampton. Records of women with their first two consecutive singleton live birth pregnancies were included. Records with unfeasible weight, height and gestational age values were excluded.

### *Exposure assessment*

Maternal weight in kilograms was measured by a midwife at the first antenatal (booking) appointment of each pregnancy, which is recommended to take place between 8 to 12 weeks gestation in the UK, according to the National Institute for Health and Care Excellence Guidelines<sup>27</sup>. Any woman who had a booking appointment at or after 24 weeks of pregnancy was excluded. Height was self-reported. BMI was calculated as weight (in kg) divided by height (in metres) squared.

BMI was categorised as underweight ( $\text{BMI} < 18.5 \text{ kg/m}^2$ ), normal weight ( $18.5$  to  $24.9 \text{ kg/m}^2$ ), overweight ( $25.0$  to  $29.9 \text{ kg/m}^2$ ) and obese ( $\geq 30 \text{ kg/m}^2$ ). Change in BMI was calculated as the difference in BMI measured at the booking appointments of the first two consecutive live birth pregnancies for each woman. This change in BMI was then categorised as weight loss ( $\geq 1$  BMI unit), weight stable ( $-1$  to  $1$  BMI unit) and weight gain ( $\geq 1$  BMI unit).

### *Outcome assessment*

Birthweight (grams) was measured by midwives at birth. Gestational age was based on a dating ultrasound scan which usually takes place by 13 weeks gestation<sup>27</sup>. Birthweight centiles was calculated using reference values for England and Wales provided in the most recently released data<sup>28</sup>. Large-for-gestational age was defined as  $>90$ th percentile weight for gestational age. This was only defined for babies born between 24 to 42 weeks gestation as reference values only exist for these gestational ages.

### *Covariables*

Maternal date of birth is recorded at the booking appointment and converted to age on extraction of the dataset to maintain anonymity. Highest maternal educational qualification was self-reported and categorised as primary, secondary, college, undergraduate, postgraduate, graduate and none. For the purposes of this analysis, this was condensed to three categories - secondary (GCSE) and under, college (A levels) and university degree or

1  
2  
3 above. Self-reported ethnicity was recorded under 16 categories and condensed to White,  
4 Mixed, Asian, Black/African/Caribbean, Chinese and Other. Categories of not asked and not  
5 stated were coded as missing. Smoking was self-reported as current smoking or non-  
6 smoking. Non-smokers were further asked if they had ever smoked or had previously  
7 smoked and quit. This was categorised as stopped more than 12 months before conception,  
8 stopped less than 12 months before conception or stopped when pregnancy confirmed.  
9 Employment was self-reported at booking appointment and categorised as employed,  
10 unemployed, in education, and not specified. Infertility treatment was categorised as  
11 no/investigations only and yes (hormonal only, in-vitro fertilisation, gamete intrafallopian  
12 transfer and other surgical) in either one or both pregnancies. Inter-pregnancy interval was  
13 defined as the interval between the first live birth and conception of the second pregnancy.  
14 The difference in days between two consecutive live births was calculated and gestational  
15 age of the latter birth subtracted from this to derive the inter-pregnancy interval.  
16  
17

### 18 *Statistical analysis*

19 All analysis was performed using Stata 15<sup>29</sup>. Univariable comparisons were carried out using  
20 ANOVA for continuous variables and chi square test for categorical variables. Linear  
21 regression was used to examine the association of maternal change in BMI between  
22 pregnancies in the sub-sample of women who gained  $\geq 1$  BMI unit weight (assessed as a  
23 continuous variable in  $\text{kg/m}^2$ ) with birthweight (assessed as a continuous variable in grams).  
24

25 Logistic regression was then used to examine the association between the categorised  
26 variable of maternal change in BMI with risk of LGA first in the whole sample and then  
27 stratified by maternal BMI category in first pregnancy. Risk of LGA was explored in the full  
28 sample adjusting for previous pregnancy outcome of LGA. The risk of LGA in second  
29 pregnancy after having a non-LGA baby in the first pregnancy was explored in a sub-sample  
30 of women who had non-LGA births in the first pregnancy. The risk of recurrent LGA (LGA in  
31 both pregnancies) was explored in a sub-sample of women who had LGA births in the first  
32 pregnancy.  
33

34 Initial univariable analysis was followed by multivariable models adjusting for potential  
35 confounding factors – maternal age, ethnicity, highest educational qualification, whether or  
36 not undergone infertility treatment, employment status, smoking behaviour in second  
37 pregnancy, gestational diabetes in second pregnancy and inter-pregnancy interval. Linear  
38 regression models with birthweight as the outcome were also adjusted for gestational age at  
39 birth and birthweight in previous pregnancy.  
40

41 A statistical significance level of 0.05 with 95% confidence intervals was used in the  
42 regression models.  
43  
44

### 45 *Ethical considerations*

46 All data were anonymised to the research team. Ethics approval was granted by the  
47 University of Southampton Faculty of Medicine Ethics Committee: study ID 25508.  
48  
49

### 50 *Patient and Public Involvement*

51 Patients and public were not involved in setting the research question or the outcome  
52 measures, nor were they involved in developing plans for the design or implementation of  
53 the study.  
54  
55  
56  
57  
58  
59



## Results

The first and second pregnancies of 15940 women were included. Of these, 16.0% of women lost  $\geq 1$  BMI unit, 36.3% remained weight stable ( $-1$  to  $1$  BMI unit) and 47.7% gained  $\geq 1$  BMI unit between their first and second live birth pregnancies. Weight loss of  $>2$  BMI units was observed in 7.3% of women whereas 10.7% gained  $>2$  BMI units and 19.8% gained three or more BMI units. Mean BMI at second pregnancy booking was  $27.9 \text{ kg/m}^2$  (standard deviation (SD) 5.8) in women who gained weight ( $\geq 1$  BMI Unit),  $24.1 \text{ kg/m}^2$  (SD 5.1) in women who lost weight, and  $23.8 \text{ kg/m}^2$  (SD 4.4) women whose weight remained stable between pregnancies ( $p < 0.001$ ) (Table 1).

Women who gained  $\geq 1$  BMI unit by the start of their second pregnancy were more likely to be smokers, unemployed, with lower educational attainment and to have a longer inter-pregnancy interval, compared to those who maintained a stable weight between pregnancies. Mean maternal age was lowest in the women who gained weight (28.4 years, standard deviation 5.5) and highest in the women who remained weight stable (29.8 years, standard deviation 5.3).

Within mothers who gained weight, 35.8% were in the normal weight BMI category, 34.3% in the overweight category, and 29.5% in the obese category by the start of their second pregnancy. This compares to 66.8%, 19.7% and 9.2% respectively within those with stable inter-pregnancy weight.

Birthweight (grams) was significantly higher in babies born to women who gained weight between pregnancies (3517g, SD 45) compared to those born to women who lost weight and remained weight stable where the mean birthweight was comparable (3463g, SD 563, 3467g, SD 523 respectively) ( $p < 0.001$ ). A lower proportion of babies born to women who lost weight (12.4%) or remained weight stable (11.9%) between pregnancies were LGA compared to 14.5% in women who gained weight ( $p < 0.001$ ). Compared to normal weight women, overweight and obese women were at increased risk of LGA births in both pregnancies with risk highest in obese women (unadjusted odds ratio 2.2, 95% CI 1.9 to 2.6,  $p < 0.001$  and unadjusted odds ratio 2.1, 95% CI 1.8 to 2.3,  $p < 0.001$  in first and second pregnancy respectively).

Figure 1 shows the percentage of LGA as recurrent LGA (first and second pregnancy) or LGA in second pregnancy only (after having a non-LGA baby in the first pregnancy) by the inter-pregnancy change in maternal BMI stratified by maternal BMI category in the first pregnancy. The lowest proportion of LGA births in the second pregnancy was in underweight women in the first pregnancy who remained weight stable (5.9%), while the highest was in obese women who gained weight (20.2%). Recurrent LGA was lowest in normal weight and overweight women who lost weight and highest in obese women who lost weight.

There was a significant positive association between birthweight in the second pregnancy with each unit increase in BMI between pregnancies. The largest increase was in normal weight women who gained  $\geq 1$  BMI unit in weight between pregnancies (adjusted increase in birthweight per unit increase in maternal BMI (13.0g, 95% CI 7.1 to 19.0,  $p < 0.001$ ) (Table 2).

The logistic regression models show an increased risk of LGA in the second pregnancy in the full sample on weight gain compared to remaining weight stable. When stratified by baseline BMI category, there was a significantly increased risk of LGA birth in the second pregnancy in normal weight women who gained  $\geq 1$  BMI unit weight (adjusted odds ratio (aOR) 1.31, 95% CI 1.13 to 1.52,  $p < 0.001$ ) compared to the reference group of normal-



weight women who remained weight stable (Table 3). No association was observed between the risk of LGA and maternal BMI change in underweight, overweight and obese women.

There was a significantly reduced risk of recurrent LGA birth in the second pregnancy in overweight women who had a LGA infant in the first pregnancy and lost  $\geq 1$  BMI unit in weight (aOR 0.44, 95% CI 0.23 to 0.85,  $p=0.02$ ) (Table 4). No association was observed between risk of recurrent LGA and maternal BMI change in underweight, normal weight and obese women.

There was a significantly increased risk of 'new' LGA birth in the second pregnancy after having a non-LGA infant in the first pregnancy in normal weight and overweight women who had gained  $\geq 1$  BMI unit weight (aOR 1.39, 95% CI 1.18 to 1.63,  $p>0.001$ , aOR 1.31, 95% CI 1.03 to 1.66,  $p=0.03$  respectively) (Table 5). No association was observed between the risk of new LGA in the second pregnancy and maternal BMI inter-pregnancy change in underweight and obese women.

## Discussion

This study examined the association of change in women's BMI between their first and second live birth pregnancies with LGA risk in their second pregnancy in a population-based cohort of 15940 women in the South of England. A large proportion (48%) of women gained  $\geq 1$  BMI unit in weight when presenting to antenatal care for their second pregnancy. The proportion of LGA births in women who lost weight was 12.4% and 11.9% in those that remained weight stable compared to 14.5% in women who gained weight. Normal weight women who gained  $\geq 1$  BMI unit by the start of their second pregnancy had an increased risk of an LGA birth. Overweight women who lost  $\geq 1$  BMI unit were had a reduced risk of recurrent LGA, whereas both normal and overweight women who gained  $\geq 1$  BMI unit between pregnancies had an increased risk of LGA birth in their second pregnancy after a non-LGA birth in the first.

Compared to the population-based Swedish cohort which carried out a similar analysis for LGA and other outcomes in 151025 women, a lower proportion of women remained weight stable in this cohort (46% compared to 36%) and a higher proportion lost (11% compared to 16%) or gained (43% compared to 48%) weight. Amongst women who gained weight, a higher proportion gained 3 or more BMI units in this cohort (20%) compared to the Swedish cohort (11%)<sup>23</sup>. Similarly, in comparison to a population-based cohort of 24520 women in Aberdeen, Scotland; a larger proportion of women in this study lost (4.8% compared to 7.3%) or gained (25.6% compared to 30.5%) weight ( $>2$  BMI units)<sup>26</sup>. The Swedish cohort used data from 1992 to 2001 and the Scottish cohort from 1986 to 2013. The differences could reflect the increase in the prevalence of maternal overweight and obesity over time.

We showed an increased risk of LGA in the second pregnancy in the full sample on weight gain compared to weight remaining stable. This effect remained after adjusting for previous outcome of LGA (in first pregnancy). On stratification by BMI, this effect was only observed in normal weight woman. In a population-based cohort in the US, women were found to be at increased risk of LGA in the second pregnancy if their pre-pregnancy BMI category changed towards overweight or obese from first to second pregnancy regardless of their BMI category in first pregnancy except in underweight women who increased to normal weight. This study only examined risk in second pregnancy without adjustment for outcome in first pregnancy and considered weight change as change in BMI category only<sup>21</sup>.

In obese women in the US, inter-pregnancy weight gain of  $\geq 2$  BMI units was associated with increased risk of LGA and a weight loss of  $\geq 2$  BMI units was associated with decreased risk

1  
2  
3 compared to the reference group of weight maintained between 2 BMI units<sup>22</sup>. We found no  
4 association between weight change and risk of second pregnancy LGA in obese women  
5 although it may be that as obese women are already at increased risk of LGA births the  
6 change in BMI between-pregnancy in this cohort was not large enough to detect a further  
7 increase in risk.

8 Risk of recurrent LGA was analysed in one previous study in Scotland which found that inter-  
9 pregnancy weight gain ( $\geq 2$  BMI units) was associated with increased risk of recurrent LGA  
10 and weight loss ( $\geq 2$  BMI units) was found to be protective. Stratification by BMI showed that  
11 women with healthy weight (BMI  $< 25\text{kg/m}^2$ ) were at increased risk of recurrent LGA on  
12 gaining weight whereas overweight women (BMI  $\geq 25\text{kg/m}^2$ ) were at reduced risk of recurrent  
13 LGA on losing weight<sup>26</sup>. We showed a similar reduction in risk in overweight women who lost  
14  $\geq 1$  BMI unit between pregnancies, but found no association in normal weight women.  
15

16 We showed an increased risk of 'new' LGA in the second pregnancy (after a non-LGA birth  
17 in the first pregnancy) on weight gain compared to remaining weight stable. After  
18 stratification by BMI, we found that this association between inter-pregnancy weight gain and  
19 new LGA remained only in normal-weight and overweight women. The findings from this  
20 study are in line with findings with other studies in Scotland<sup>24</sup> and Sweden<sup>23</sup> which found  
21 increased risk of 'new' LGA with modest (1-3 BMI units) and large ( $\geq 3$  BMI units) weight  
22 gain. Both studies also found a decreased risk with between pregnancy weight loss of  $> 1$   
23 BMI unit which was not found in our study. Both studies stratified BMI as  $<$  and  $\geq 25\text{kg/m}^2$   
24 and thus this is not directly comparable with our analysis as we further stratified the  
25  $\geq 25\text{kg/m}^2$  category as overweight (BMI 25-29.9 $\text{kg/m}^2$ ) and obese ( $\geq 30\text{kg/m}^2$ ) and found an  
26 increased risk of new LGA in overweight, but not in obese women.  
27

28 Women included in this analysis had a range of inter-pregnancy interval of less than 1 to up  
29 to 12 years and thus weight change could be due to postpartum weight retention or late  
30 postpartum weight gain. A study looking at the effects of pregnancy on long-term weight gain  
31 concluded that women who had not lost pregnancy weight at one year postpartum were  
32 more likely to retain weight longer term<sup>30</sup>. We examined the risk of maternal weight gain with  
33 length of the inter-pregnancy interval and found that women with an interval of 12-23 months  
34 were least likely to start the next pregnancy at a higher weight<sup>31</sup>. We also examined inter-  
35 pregnancy interval as a predictor for risk of LGA and found no association but found that an  
36 interval of 12-23 months was associated with lower risk of small-for-gestational age (SGA)  
37 (data not shown). In this study, we have adjusted for the length of the inter-pregnancy  
38 interval in the models.  
39

40 Future research that characterises the predictors of postpartum weight change would help  
41 design interventions to support postpartum weight loss. Key to this is an understanding of  
42 the pattern of weight change during this period as well as identifying the optimal setting and  
43 delivery of the intervention. Advice regarding healthy eating and physical activity is more  
44 commonly received during pregnancy but when advice is received postpartum, it was found  
45 not to be associated with healthy diet or physical activity behaviours<sup>32</sup>. Most interventions  
46 that have been successful in limiting and promoting weight loss were combined diet and  
47 physical activity interventions with self-monitoring<sup>33</sup>. However, the timing of engaging women  
48 and length of intervention or engagement are important with one study showing that an  
49 intervention from 16 weeks pregnancy to six months postpartum was more effective than the  
50 same intervention from birth to six months postpartum intervention<sup>34</sup>.

51 As pregnancy and early postpartum is a period of major change for women and their  
52 families, interventions need to be carefully designed to be attractive, flexible and feasible for  
53 women at this stage with competing priorities and time demands. Contact as part of these  
54 interventions also needs to be medium to long term to allow for weight maintenance. The  
55 majority of appointments during the postpartum period in the UK are child health and  
56 development reviews with the health visitor and one with the general practitioner in the first  
57

two years after birth. The feasibility of using these appointments to engage and support maternal weight and health needs to be explored.

### **Strengths and limitations**

This is a relatively large population-based cohort including women from various socioeconomic and ethnic backgrounds delivering at a large maternity centre in Southampton, UK, thus representative of the regional population. One city may not be representative of the national population, and according to the UK Department of Communities and Local Government English indices of deprivation report, Southampton is more deprived than average with the situation having worsened between 2010 and 2015<sup>35</sup>. However, about half of the women included in this analysis reside in the rest of Hampshire (the region where Southampton is situated), which is less deprived. The sample was 87% White comparable to the 2011 England and Wales population census of 86% White<sup>36</sup>. The analysis was adjusted for several key confounders that were reasonably complete (96% complete for ethnicity and employment status). Both the exposure and outcome in this study were objectively measured by healthcare professionals as part of routine antenatal and delivery care.

An important limitation was the lack of information on weight gain during pregnancy, which is a key factor influencing risk of LGA births<sup>37</sup>. Women who had their first booking appointment later into the pregnancy (more than 24 weeks) were excluded from the analysis in order to ensure comparability of weight measurements between pregnancies. Some of the confounding factors which were accounted for in the analysis were self-reported, however the information was collected prospectively, therefore any measurement error is likely to be non-differential. Another limitation is that these findings are based on observational data so inferences about causation cannot be drawn and the risk of residual confounding influencing the results needs to be considered. However, it is not feasible or ethical to conduct a randomised trial to address the aim of this study.

In conclusion, a large proportion of women gained weight between their first and second pregnancy, and a higher proportion of these women had a LGA birth in their second pregnancy compared to their first in this English cohort. Overall, weight gain between pregnancies was associated with an increased risk of LGA in the second pregnancy. Risk of new LGA was higher in normal weight and overweight women who gained weight after a non-LGA birth in their first pregnancy compared who remained weight stable. Overweight women who had a LGA birth in their first pregnancy were at a lower risk of a recurrent LGA birth in their second pregnancy if they lost weight between pregnancies. Supporting efforts to lose weight in overweight and obese women between pregnancies, and stop weight gain in all women planning to have further children (except those who are underweight) are important preventive measures of subsequent adverse maternal and offspring health outcomes.

### **Author Contributions**

Study design (NZ, PJR, NSM, NAA), data analysis (NZ, SW), acquisition and interpretation of the data (NZ, NAA), drafting of the abstract (NZ), revising for content (NZ, SW, PJR, NSM, NAA) and approval of final version before submission (NZ, SW, PJR, NSM, NAA).

### **Data statement**

Anonymised data are only available upon request from the authors conditional on the approval by the appropriate institutional ethics and research governance processes.

## Acknowledgements

The authors would like to thank David Cable (Electronic Patient Records Implementation and Service Manager) at University Hospital Southampton for support in accessing the data used in this study. They would also like to thank their clinical colleagues at the Princess Anne Hospital Southampton for collecting the data and making it available for analysis.

## Funding

This work is supported by a University of Southampton Primary Care and Population Sciences PhD studentship (to NZ) , the Academy of Medical Sciences and the Wellcome Trust (Grant no: AMS\_HOP001\1060 to NAA). NAA is also in receipt of research support from the National Institute for Health Research through the NIHR Southampton Biomedical Research Centre.

## Competing interests

The authors have no competing interests to declare.

## References

1. Heslehurst N, Rankin J, Wilkinson JR, et al. A nationally representative study of maternal obesity in England, UK: trends in incidence and demographic inequalities in 619 323 births, 1989-2007. *Int J Obes (Lond)* 2010;34(3):420-8.
2. Poston L. Maternal obesity, gestational weight gain and diet as determinants of offspring long term health. *Best Pract Res Clin Endocrinol Metab* 2012;26(5):627-39.
3. Barker DJP. Fetal origins of coronary heart disease. *BMJ* 1995;311:171-74.
4. Kramer MS, Morin I, Yang H, et al. Why are babies getting bigger? Temporal trends in fetal growth and its determinants. *J Pediatr* 2002;141(4):538-42.
5. Surkan PJ, Hsieh CC, Johansson AL, et al. Reasons for increasing trends in large for gestational age births. *Obstet Gynecol* 2004;104(4):720-6.
6. Hunt KJ, Schuller KL. The Increasing Prevalence of Diabetes in Pregnancy. *Obstet Gynecol Clin North Am.* 2007;34(2):173-99.
7. Ignell C, Claesson R, Anderberg E, et al. Trends in the prevalence of gestational diabetes mellitus in southern Sweden, 2003-2012. *Acta Obstet Gynecol Scand* 2014;93(4):420-4.
8. Casey BM, Lucas MJ, McIntire DD, et al. Pregnancy Outcomes in Women With Gestational Diabetes Compared With the General Obstetric Population. *Obstetrics & Gynecology* 1997;90(6):869-73.
9. Reilly JJ, Armstrong J, Dorosty AR, et al. Early life risk factors for obesity in childhood: cohort study. *BMJ* 2005;330(7504):1357.
10. Danielzik S, Czerwinski-Mast M, Langnase K, et al. Parental overweight, socioeconomic status and high birth weight are the major determinants of overweight and obesity in 5-7 y-old children: baseline data of the Kiel Obesity Prevention Study (KOPS). *Int J Obes Relat Metab Disord* 2004;28(11):1494-502.
11. Curhan GC, Willett WC, Rimm EB, et al. Birth Weight and Adult Hypertension, Diabetes Mellitus, and Obesity in US Men. *Circulation* 1996;94:3246-50.
12. Curhan GC, Chertow GM, Willett WC, et al. Birth Weight and Adult Hypertension and Obesity in Women. *Circulation* 1996;94:1310-15.



13. Phillips DIW, Young JB. Birth weight, climate at birth and the risk of obesity in adult life. *International Journal of Obesity* 2000;24:281-87.
14. Baptiste-Roberts K, Nicholson WK, Wang NY, et al. Gestational diabetes and subsequent growth patterns of offspring: the National Collaborative Perinatal Project. *Matern Child Health J* 2012;16(1):125-32.
15. Zhu Y, Olsen SF, Mendola P, et al. Growth and obesity through the first 7 y of life in association with levels of maternal glycemia during pregnancy: a prospective cohort study. *Am J Clin Nutr* 2016;103(3):794-800.
16. Marchi J, Berg M, Dencker A, et al. Risks associated with obesity in pregnancy, for the mother and baby: a systematic review of reviews. *Obes Rev* 2015;16(8):621-38.
17. Swamy GK, Edwards S, Gelfand A, et al. Maternal age, birth order, and race: differential effects on birthweight. *J Epidemiol Community Health* 2012;66(2):136-42.
18. Wilcox MA, Chang AMZ, Johnson IR. The effects of parity on birthweight using successive pregnancies. *Acta Obstetrica et Gynecologica Scandinavica* 1996;75(5):459-63.
19. Beaty TH, Skjaerven R, Breazeale DR, et al. Analyzing Sibship Correlations in Birth Weight Using Large Sibships From Norway. *Genetic Epidemiology* 1997;14:423-33.
20. Hinkle SN, Albert PS, Mendola P, et al. The association between parity and birthweight in a longitudinal consecutive pregnancy cohort. *Paediatr Perinat Epidemiol* 2014;28(2):106-15.
21. Getahun D, Ananth CV, Peltier MR, et al. Changes in prepregnancy body mass index between the first and second pregnancies and risk of large-for-gestational-age birth. *Am J Obstet Gynecol* 2007;196(6):530 e1-8.
22. Jain AP, Gavard JA, Rice JJ, et al. The impact of interpregnancy weight change on birthweight in obese women. *Am J Obstet Gynecol* 2013;208(3):205 e1-7.
23. Villamor E, Cnattingius S. Interpregnancy weight change and risk of adverse pregnancy outcomes: a population-based study. *Lancet* 2006;368(9542):1164-70.
24. Wallace JL, Bhattacharya S, Campbell DM, et al. Inter-pregnancy weight change impacts placental weight and is associated with the risk of adverse pregnancy outcomes in the second pregnancy. *BMC Pregnancy and Childbirth* 2014;14(40).
25. McBain RD, Dekker GA, Clifton VL, et al. Impact of inter-pregnancy BMI change on perinatal outcomes: a retrospective cohort study. *Eur J Obstet Gynecol Reprod Biol* 2016;205:98-104.
26. Wallace JM, Bhattacharya S, Campbell DM, et al. Inter-Pregnancy Weight Change and the Risk of Recurrent Pregnancy Complications. *PLoS One* 2016;11(5):e0154812.
27. National Institute for Health Care and Excellence. Antenatal care for uncomplicated pregnancies. Manchester, UK, 2008.
28. Norris T, Seaton SE, Manktelow BN, et al. Updated birth weight centiles for England and Wales. *Archives of Disease in Childhood. Fetal and Neonatal Edition* 2017.
29. Stata Statistical Software: Release 15 [program]. College Station, TX: StataCorp LLC, 2017.
30. Linné Y, Dye L, Barkeling B, et al. Long-Term Weight Development in Women: A 15-Year Follow-up of the Effects of Pregnancy. *Obesity Research* 2004;12(7):1166-78.
31. Ziauddeen N, Roderick PJ, Macklon NS, et al. Length of inter-pregnancy interval and subsequent preconception adiposity: Findings from a population-based cohort in the South of England. *Revue d'Épidémiologie et de Santé Publique* 2018;66:S374.
32. van der Pligt P, Olander EK, Ball K, et al. Maternal dietary intake and physical activity habits during the postpartum period: associations with clinician advice in a sample of Australian first time mothers. *BMC Pregnancy Childbirth* 2016;16:27.
33. van der Pligt P, Willcox J, Hesketh KD, et al. Systematic review of lifestyle interventions to limit postpartum weight retention: implications for future opportunities to prevent maternal overweight and obesity following childbirth. *Obes Rev* 2013;14(10):792-805.
34. Huang TT, Yeh CY, Tsai YC. A diet and physical activity intervention for preventing weight retention among Taiwanese childbearing women: a randomised controlled trial. *Midwifery* 2011;27(2):257-64.

- 1  
2  
3 35. Department for Communities and Local Government. The English Indices of Deprivation  
4 2015, 2015.  
5 36. Office for National Statistics. Ethnicity and National Identity in England and Wales 201,  
6 2012.  
7 37. Nohr EA, Vaeth M, Baker JL, et al. Combined associations of prepregnancy body mass  
8 index and gestational weight gain with the outcome of pregnancy. *American Journal*  
9 *of Clinical Nutrition* 2008;87(6):1750-59.

### 10 11 12 **Figure legend**

13  
14 Figure 1: The percentage of LGA births in second pregnancy stratified by maternal BMI  
15 category and previous outcome of LGA  
16

### 17 18 19 20 **Table legends:**

21  
22 Table 1: Maternal and birth characteristics in second live birth pregnancy categorised by  
23 weight loss/no change and weight gain from previous pregnancy for the period of January  
24 2003 - September 2017, University Hospital Southampton NHS Foundation Trust,  
25 Southampton, Hampshire, England  
26

27 Table 2: Linear regression estimates for the association between birthweight (in g) in second  
28 live birth pregnancy with inter-pregnancy change in maternal BMI in the sub-sample of  
29 women who gained  $\geq 1$  BMI unit stratified by maternal body mass index (BMI) category at  
30 the first pregnancy  
31

32 Table 3: Logistic regression models testing the association between risk of LGA in the  
33 second pregnancy and change in maternal body mass index (BMI) measured at the first  
34 antenatal visit of each pregnancy stratified by BMI category at the start of first pregnancy  
35

36 Table 4: Logistic regression models testing the association between risk of recurrent LGA in  
37 the second pregnancy and change in maternal body mass index (BMI) measured at the first  
38 antenatal visit of each pregnancy stratified by BMI category in first pregnancy  
39

40 Table 5: Logistic regression models testing the association between the risk of LGA birth in  
41 the second pregnancy following a non-LGA birth in the first pregnancy and change in  
42 maternal body mass index (BMI) measured at the first antenatal visit of each pregnancy  
43 stratified by BMI category in first pregnancy  
44  
45  
46  
47  
48  
49  
50  
51  
52  
53  
54  
55  
56  
57  
58  
59  
60

1  
2  
3  
4  
5  
6  
7  
8  
9  
10  
11  
12  
13  
14  
15  
16  
17  
18  
19  
20  
21  
22  
23  
24  
25  
26  
27  
28  
29  
30  
31  
32  
33  
34  
35  
36  
37  
38  
39  
40  
41  
42  
43  
44  
45  
46  
47

Table 1: Maternal and birth characteristics in second live birth pregnancy categorised by weight loss/no change and weight gain from previous pregnancy for the period of January 2003 - September 2017, University Hospital Southampton NHS Foundation Trust, Southampton, Hampshire, England

|                                                        | Lost <= -1 BMI units from previous pregnancy | Weight stable (>-1 to <1 BMI unit) | Gained >=1 BMI units from previous pregnancy | p      |
|--------------------------------------------------------|----------------------------------------------|------------------------------------|----------------------------------------------|--------|
| N                                                      | 2548                                         | 5785                               | 7607                                         |        |
| Maternal age, years (mean ± SD)                        | 28.7 ± 5.4                                   | 29.8 ± 5.3                         | 28.4 ± 5.5                                   | <0.001 |
| Timing of first booking appointment, weeks (mean ± SD) | 10.8 ± 2.3                                   | 11.0 ± 2.3                         | 11.1 ± 2.5                                   | <0.001 |
| Maternal BMI at booking, kg/m <sup>2</sup> (mean ± SD) | 24.1 ± 5.1                                   | 23.8 ± 4.4                         | 27.9 ± 5.8                                   | <0.001 |
| Maternal BMI at booking (%; 95% CI)                    |                                              |                                    |                                              | <0.001 |
| Underweight (< 18.5)                                   | 6.9 (5.9 to 7.9)                             | 4.3 (3.8 to 4.8)                   | 0.4 (0.3 to 0.6)                             |        |
| Normal weight (18.5 to 24.9)                           | 61.1 (59.2 to 63.0)                          | 66.8 (65.6 to 68.1)                | 35.8 (34.7 to 36.9)                          |        |
| Overweight (25.0 to 29.9)                              | 20.1 (18.6 to 21.7)                          | 19.7 (18.7 to 20.7)                | 34.3 (33.2 to 35.4)                          |        |
| Obese (≥30.0)                                          | 11.9 (10.7 to 13.3)                          | 9.2 (8.5 to 10.0)                  | 29.5 (28.5 to 30.5)                          |        |
| Maternal smoking status at booking (%; 95% CI)         |                                              |                                    |                                              | <0.001 |
| Never smoked/quit                                      | 57.2 (55.3 to 59.2)                          | 63.0 (61.8 to 64.3)                | 56.4 (55.3 to 57.6)                          |        |
| Stopped >1 year before conceiving                      | 16.1 (14.6 to 17.5)                          | 17.2 (16.3 to 18.2)                | 16.5 (15.7 to 17.4)                          |        |
| Stopped <1 year prior to conceiving                    | 4.0 (3.3 to 4.8)                             | 2.8 (2.4 to 3.2)                   | 4.1 (3.7 to 4.6)                             |        |
| Stopped when pregnancy confirmed                       | 6.8 (5.8 to 7.8)                             | 5.9 (5.3 to 6.6)                   | 8.3 (7.7 to 9.0)                             |        |
| Continued smoking                                      | 15.9 (14.5 to 17.4)                          | 11.0 (10.2 to 11.8)                | 14.6 (13.8 to 15.4)                          |        |
| Maternal education (%; 95% CI)                         |                                              |                                    |                                              | <0.001 |
| Secondary (GCSE) or under                              | 30.7 (28.9 to 32.5)                          | 24.0 (22.9 to 25.2)                | 32.3 (31.2 to 33.3)                          |        |
| College (A levels)                                     | 40.4 (38.5 to 42.3)                          | 38.8 (37.6 to 40.1)                | 42.1 (40.1 to 43.2)                          |        |
| University degree or above                             | 28.9 (27.2 to 30.7)                          | 37.1 (35.9 to 38.4)                | 25.6 (24.6 to 26.6)                          |        |
| Maternal employment (%; 95% CI)                        |                                              |                                    |                                              | <0.001 |
| Employed                                               | 66.2 (64.3 to 68.0)                          | 71.7 (70.5 to 72.9)                | 62.7 (61.6 to 63.8)                          |        |
| Unemployed                                             | 31.8 (30.0 to 33.7)                          | 26.9 (25.8 to 28.1)                | 35.4 (34.4 to 36.5)                          |        |
| In education                                           | 0.9 (0.6 to 1.4)                             | 0.8 (0.6 to 1.1)                   | 1.2 (0.9 to 1.4)                             |        |
| Not specified                                          | 1.0 (0.7 to 1.5)                             | 0.6 (0.4 to 0.8)                   | 0.7 (0.5 to 0.9)                             |        |
| Ethnicity (%; 95% CI)                                  |                                              |                                    |                                              | <0.001 |
| White                                                  | 89.9 (88.7 to 91.1)                          | 88.0 (87.1 to 88.8)                | 85.0 (84.2 to 85.8)                          |        |
| Mixed                                                  | 0.8 (0.5 to 1.3)                             | 0.9 (0.7 to 1.2)                   | 1.5 (1.2 to 1.8)                             |        |
| Asian                                                  | 4.2 (3.5 to 5.1)                             | 5.0 (4.4 to 5.6)                   | 6.9 (6.4 to 7.5)                             |        |



|                                          |                     |                     |                     |        |
|------------------------------------------|---------------------|---------------------|---------------------|--------|
| Black/African/Caribbean                  | 0.6 (0.4 to 1.0)    | 1.0 (0.8 to 1.3)    | 1.9 (1.6 to 2.3)    |        |
| Chinese                                  | 0.5 (0.3 to 0.9)    | 0.7 (0.5 to 0.9)    | 0.5 (0.3 to 0.7)    |        |
| Other                                    | 0.7 (0.4 to 1.1)    | 1.0 (0.8 to 1.3)    | 1.1 (0.9 to 1.4)    |        |
| Not specified                            | 3.1 (2.5 to 3.9)    | 3.5 (3.0 to 4.0)    | 3.0 (2.7 to 3.5)    |        |
| Inter-pregnancy interval (median, IQR)   | 21.7 (14.4 to 32.7) | 21.6 (14.1 to 32.0) | 25.0 (15.0 to 39.7) | <0.001 |
| Inter-pregnancy interval (% , 95% CI)    |                     |                     |                     |        |
| 0-11 months                              | 17.4 (15.9 to 18.9) | 17.6 (16.6 to 18.6) | 17.5 (16.7 to 18.4) | <0.001 |
| 12-23 months                             | 39.8 (37.8 to 41.7) | 39.9 (38.6 to 41.1) | 30.3 (29.3 to 31.3) |        |
| 24-35 months                             | 22.6 (21.0 to 24.2) | 23.6 (22.5 to 24.7) | 22.8 (21.9 to 23.8) |        |
| 36 months or more                        | 20.3 (18.7 to 21.9) | 18.9 (17.9 to 20.0) | 29.4 (28.4 to 30.4) |        |
| Birthweight, grams (mean $\pm$ SD)       | 3463 $\pm$ 563      | 3467 $\pm$ 523      | 3517 $\pm$ 545      | <0.001 |
| Previous size at birth (first pregnancy) |                     |                     |                     |        |
| Small-for-gestational age                | 13.1 (11.8 to 14.4) | 12.6 (11.8 to 13.5) | 12.0 (11.3 to 12.8) | 0.17   |
| Appropriate-for-gestational age          | 79.6 (77.9 to 81.1) | 81.1 (80.0 to 82.1) | 80.7 (79.8 to 81.6) |        |
| Large-for-gestational age                | 7.4 (6.4 to 8.5)    | 6.3 (5.7 to 7.0)    | 7.3 (6.7 to 7.9)    |        |
| Size at birth (second pregnancy)         |                     |                     |                     |        |
| Small-for-gestational age                | 8.7 (7.6 to 9.8)    | 7.0 (6.4 to 7.7)    | 6.4 (5.9 to 7.0)    | <0.001 |
| Appropriate-for-gestational age          | 79.0 (77.3 to 80.5) | 81.1 (80.0 to 82.1) | 79.1 (78.2 to 80.0) |        |
| Large-for-gestational age                | 12.4 (11.1 to 13.7) | 11.9 (11.1 to 12.8) | 14.5 (13.7 to 15.3) |        |

1  
2  
3  
4  
5  
6  
7  
8  
9  
10  
11  
12  
13  
14  
15  
16  
17  
18  
19  
20  
21  
22  
23  
24  
25  
26  
27  
28  
29  
30  
31  
32  
33  
34  
35  
36  
37  
38  
39  
40  
41  
42  
43  
44  
45  
46  
47

Table 2: Linear regression estimates for the association between birthweight (in g) in second live birth pregnancy with inter-pregnancy change in maternal BMI in the sub-sample of women who gained  $\geq 1$  BMI unit stratified by maternal body mass index (BMI) category at the first pregnancy

|         | First to second pregnancy |                                                                   |        |                                |                                                                   |      |                                  |                                                                   |        |                               |                                                                   |      |                          |                                                                   |      |
|---------|---------------------------|-------------------------------------------------------------------|--------|--------------------------------|-------------------------------------------------------------------|------|----------------------------------|-------------------------------------------------------------------|--------|-------------------------------|-------------------------------------------------------------------|------|--------------------------|-------------------------------------------------------------------|------|
|         | Full sample               |                                                                   |        | Underweight at first pregnancy |                                                                   |      | Normal weight at first pregnancy |                                                                   |        | Overweight at first pregnancy |                                                                   |      | Obese at first pregnancy |                                                                   |      |
|         | n                         | Birthweight (g) per unit increase in maternal BMI change (95% CI) | p      | n                              | Birthweight (g) per unit increase in maternal BMI change (95% CI) | p    | n                                | Birthweight (g) per unit increase in maternal BMI change (95% CI) | p      | n                             | Birthweight (g) per unit increase in maternal BMI change (95% CI) | p    | n                        | Birthweight (g) per unit increase in maternal BMI change (95% CI) | p    |
| Model 1 | 7607                      | 8.3<br>3.8 to 12.9                                                | <0.001 | 353                            | 1.5<br>-20.4 to 23.3                                              | 0.89 | 4326                             | 10.0<br>3.6 to 16.5                                               | 0.002  | 1913                          | -3.8<br>-12.0 to 4.5                                              | 0.37 | 1015                     | 2.3<br>-10.0 to 14.6                                              | 0.72 |
| Model 2 | 7607                      | 6.8<br>2.8 to 10.7                                                | 0.001  | 353                            | -4.0<br>-23.0 to 15.0                                             | 0.68 | 4326                             | 9.3<br>3.7 to 14.9                                                | 0.001  | 1913                          | -1.6<br>-8.8 to 5.7                                               | 0.67 | 1015                     | 2.9<br>-8.0 to 13.7                                               | 0.60 |
| Model 3 | 7324                      | 9.9<br>5.9 to 14.0                                                | <0.001 | 338                            | -2.4<br>-21.5 to 16.8                                             | 0.81 | 4154                             | 12.0<br>6.2 to 17.7                                               | <0.001 | 1839                          | 4.3<br>-3.3 to 11.8                                               | 0.27 | 993                      | 4.6<br>-6.7 to 15.8                                               | 0.43 |
| Model 4 | 7324                      | 7.8<br>3.7 to 11.9                                                | <0.001 | 338                            | -3.0<br>-22.3 to 16.4                                             | 0.76 | 4154                             | 12.1<br>6.3 to 17.9                                               | <0.001 | 1839                          | 4.8<br>-2.7 to 12.4                                               | 0.21 | 993                      | 4.3<br>-6.9 to 15.6                                               | 0.45 |
| Model 5 | 7324                      | 9.0<br>4.8 to 13.2                                                | <0.001 | 338                            | -2.8<br>-22.3 to 16.6                                             | 0.78 | 4154                             | 13.0<br>7.1 to 19.0                                               | <0.001 | 1839                          | 6.1<br>-1.7 to 13.8                                               | 0.12 | 993                      | 6.6<br>-5.0 to 18.1                                               | 0.26 |

Model 1 is adjusted for: gestational age at birth

Model 2 is adjusted for: gestational age at birth, birth weight (previous pregnancy) and gestational age at birth (previous pregnancy)

Model 3 is adjusted for: gestational age at birth, birth weight (previous pregnancy) and gestational age at birth (previous pregnancy), maternal age, ethnicity, highest educational qualification, whether undergone infertility treatment, smoking status, employment status and infant gender

Model 4 is adjusted for: gestational age at birth, birth weight (previous pregnancy) and gestational age at birth (previous pregnancy), maternal age, ethnicity, highest educational qualification, whether undergone infertility treatment, smoking status, employment status, infant gender, baseline BMI and gestational diabetes in current pregnancy

Model 5 is adjusted for: gestational age at birth, birth weight (previous pregnancy) and gestational age at birth (previous pregnancy), maternal age, ethnicity, highest educational qualification, whether undergone infertility treatment, smoking status, employment status, infant gender, baseline BMI, gestational diabetes in current pregnancy and inter-pregnancy interval

Table 3: Logistic regression models testing the association between risk of LGA in the second pregnancy and change in maternal body mass index (BMI) measured at the first antenatal visit of each pregnancy stratified by BMI category at the start of first pregnancy

|            | Maternal BMI change (categorised)            | First to second pregnancy |                         |        |                                |                         |      |                                  |                         |        |                               |                         |      |                          |                         |      |
|------------|----------------------------------------------|---------------------------|-------------------------|--------|--------------------------------|-------------------------|------|----------------------------------|-------------------------|--------|-------------------------------|-------------------------|------|--------------------------|-------------------------|------|
|            |                                              | Full sample               |                         |        | Underweight at first pregnancy |                         |      | Normal weight at first pregnancy |                         |        | Overweight at first pregnancy |                         |      | Obese at first pregnancy |                         |      |
|            |                                              | n                         | Odds ratio, OR (95% CI) | p      | n                              | Odds ratio, OR (95% CI) | p    | n                                | Odds ratio, OR (95% CI) | p      | n                             | Odds ratio, OR (95% CI) | p    | n                        | Odds ratio, OR (95% CI) | p    |
| Unadjusted | Lost <= -1 BMI units from previous pregnancy | 15922                     | 1.04<br>0.90 to 1.20    | 0.56   | 599                            | -                       | -    | 9427                             | 0.79<br>0.63 to 0.99    | 0.04   | 3800                          | 0.86<br>0.67 to 1.12    | 0.27 | 2075                     | 1.03<br>0.75 to 1.40    | 0.87 |
|            | Gained >=1 BMI units from previous pregnancy |                           | 1.25<br>1.13 to 1.39    | <0.001 |                                | 2.19<br>0.92 to 5.24    | 0.08 |                                  | 1.23<br>1.07 to 1.41    | 0.003  |                               | 1.11<br>0.91 to 1.35    | 0.32 |                          | 1.11<br>0.84 to 1.45    | 0.46 |
| Model 1    | Lost <= -1 BMI units from previous pregnancy | 15897                     | 1.01<br>0.87 to 1.17    | 0.90   | 599                            | -                       | -    | 9409                             | 0.84<br>0.67 to 1.06    | 0.14   | 3796                          | 0.83<br>0.63 to 1.09    | 0.17 | 2072                     | 0.96<br>0.69 to 1.32    | 0.79 |
|            | Gained >=1 BMI units from previous pregnancy |                           | 1.23<br>1.11 to 1.37    | <0.001 |                                | 2.09<br>0.87 to 5.04    | 0.10 |                                  | 1.22<br>1.06 to 1.40    | 0.006  |                               | 1.11<br>0.90 to 1.37    | 0.31 |                          | 1.07<br>0.81 to 1.42    | 0.62 |
| Model 2    | Lost <= -1 BMI units from previous pregnancy | 15281                     | 1.04<br>0.89 to 1.21    | 0.64   | 553                            | -                       | -    | 9013                             | 0.89<br>0.70 to 1.13    | 0.33   | 3650                          | 0.85<br>0.64 to 1.12    | 0.25 | 2024                     | 0.95<br>0.68 to 1.32    | 0.75 |
|            | Gained >=1 BMI units from previous           |                           | 1.29<br>1.16 to 1.45    | <0.001 |                                | 1.65<br>0.65 to 4.20    | 0.29 |                                  | 1.30<br>1.12 to 1.51    | <0.001 |                               | 1.17<br>0.94 to 1.44    | 0.16 |                          | 1.09<br>0.82 to 1.45    | 0.56 |

|         |                                                                                                                                   |       |                         |        |     |                         |      |      |                         |       |      |                         |      |      |                         |      |
|---------|-----------------------------------------------------------------------------------------------------------------------------------|-------|-------------------------|--------|-----|-------------------------|------|------|-------------------------|-------|------|-------------------------|------|------|-------------------------|------|
| Model 3 | pregnancy<br>Lost <= -1<br>BMI units<br>from<br>previous<br>pregnancy<br>Gained >=1<br>BMI units<br>from<br>previous<br>pregnancy | 15281 | 0.88<br>0.76 to<br>1.03 | 0.13   | 544 | -                       | -    | 9013 | 0.84<br>0.66 to<br>1.07 | 0.16  | 3650 | 0.84<br>0.64 to<br>1.11 | 0.23 | 2024 | 0.92<br>0.66 to<br>1.28 | 0.61 |
|         |                                                                                                                                   |       | 1.23<br>1.10 to<br>1.37 | <0.001 |     | 1.67<br>0.66 to<br>4.26 | 0.28 |      | 1.29<br>1.11 to<br>1.49 | 0.001 |      | 1.16<br>0.94 to<br>1.44 | 0.17 |      | 1.08<br>0.81 to<br>1.44 | 0.61 |
| Model 4 | Lost <= -1<br>BMI units<br>from<br>previous<br>pregnancy<br>Gained >=1<br>BMI units<br>from<br>previous<br>pregnancy              | 15281 | 0.89<br>0.76 to<br>1.04 | 0.14   | 544 | -                       | -    | 9013 | 0.84<br>0.66 to<br>1.07 | 0.16  | 3650 | 0.84<br>0.64 to<br>1.12 | 0.24 | 2024 | 0.95<br>0.68 to<br>1.33 | 0.77 |
|         |                                                                                                                                   |       | 1.24<br>1.11 to<br>1.39 | <0.001 |     | 1.62<br>0.63 to<br>4.20 | 0.32 |      | 1.29<br>1.11 to<br>1.50 | 0.001 |      | 1.17<br>0.94 to<br>1.45 | 0.16 |      | 1.13<br>0.84 to<br>1.51 | 0.42 |

\* Weight stable (>-1 to <1 BMI unit) was used as the reference group.

Model 1 is adjusted for: previous outcome of LGA

Model 2 is adjusted for: previous outcome of LGA, maternal age, ethnicity, highest educational qualification, whether undergone infertility treatment, smoking status, employment status and infant gender

Model 3 is adjusted for: previous outcome of LGA, maternal age, ethnicity, highest educational qualification, whether undergone infertility treatment, smoking status, employment status, infant gender, baseline BMI and gestational diabetes in current pregnancy

Model 4 is adjusted for: previous outcome of LGA, maternal age, ethnicity, highest educational qualification, whether undergone infertility treatment, smoking status, employment status, infant gender, baseline BMI, gestational diabetes in current pregnancy and inter-pregnancy interval

Table 4: Logistic regression models testing the association between risk of recurrent LGA in the second pregnancy and change in maternal body mass index (BMI) measured at the first antenatal visit of each pregnancy stratified by BMI category in first pregnancy

|            | Maternal BMI change (categorised)            | First to second pregnancy |                         |      |                                  |                         |      |                               |                         |      |                          |                         |      |
|------------|----------------------------------------------|---------------------------|-------------------------|------|----------------------------------|-------------------------|------|-------------------------------|-------------------------|------|--------------------------|-------------------------|------|
|            |                                              | Full sample               |                         |      | Normal weight at first pregnancy |                         |      | Overweight at first pregnancy |                         |      | Obese at first pregnancy |                         |      |
|            |                                              | n                         | Odds ratio, OR (95% CI) | p    | n                                | Odds ratio, OR (95% CI) | p    | n                             | Odds ratio, OR (95% CI) | p    | n                        | Odds ratio, OR (95% CI) | P    |
| Unadjusted | Lost <= -1 BMI units from previous pregnancy | 1109                      | 0.80<br>0.56 to 1.14    | 0.23 | 521                              | 0.68<br>0.35 to 1.32    | 0.25 | 338                           | 0.47<br>0.25 to 0.87    | 0.02 | 236                      | 1.33<br>0.64 to 2.75    | 0.44 |
|            | Gained >=1 BMI units from previous pregnancy |                           | 0.93<br>0.72 to 1.21    | 0.60 |                                  | 0.89<br>0.62 to 1.28    | 0.54 |                               | 0.67<br>0.41 to 1.12    | 0.13 |                          | 1.45<br>0.75 to 2.80    | 0.27 |
| Model 1    | Lost <= -1 BMI units from previous pregnancy | 1066                      | 0.85<br>0.59 to 1.23    | 0.38 | 500                              | 0.67<br>0.34 to 1.35    | 0.26 | 324                           | 0.45<br>0.23 to 0.86    | 0.02 | 229                      | 1.42<br>0.66 to 3.05    | 0.37 |
|            | Gained >=1 BMI units from previous pregnancy |                           | 1.01<br>0.77 to 1.34    | 0.94 |                                  | 0.99<br>0.67 to 1.46    | 0.95 |                               | 0.71<br>0.42 to 1.21    | 0.21 |                          | 1.50<br>0.75 to 3.00    | 0.25 |
| Model 2    | Lost <= -1 BMI units from previous pregnancy | 1066                      | 0.72<br>0.49 to 1.06    | 0.09 | 500                              | 0.63<br>0.32 to 1.28    | 0.20 | 324                           | 0.44<br>0.23 to 0.85    | 0.02 | 229                      | 1.34<br>0.62 to 2.89    | 0.46 |
|            | Gained >=1 BMI units from previous pregnancy |                           | 0.97<br>0.73 to 1.29    | 0.84 |                                  | 0.97<br>0.65 to 1.43    | 0.86 |                               | 0.70<br>0.41 to 1.20    | 0.20 |                          | 1.51<br>0.75 to 3.01    | 0.25 |
| Model 3    | Lost <= -1 BMI units from previous pregnancy | 1066                      | 0.72<br>0.49 to 1.06    | 0.09 | 500                              | 0.63<br>0.31 to 1.27    | 0.20 | 324                           | 0.44<br>0.23 to 0.85    | 0.02 | 229                      | 1.39<br>0.64 to 3.02    | 0.41 |
|            | Gained >=1 BMI units from previous pregnancy |                           | 0.97<br>0.73 to 1.29    | 0.86 |                                  | 0.96<br>0.64 to 1.42    | 0.83 |                               | 0.70<br>0.41 to 1.20    | 0.20 |                          | 1.59<br>0.79 to 3.22    | 0.19 |

1  
2  
3  
4  
5  
6  
7  
8  
9  
10  
11  
12  
13  
14  
15  
16  
17  
18  
19  
20  
21  
22  
23  
24  
25  
26  
27  
28  
29  
30  
31  
32  
33  
34  
35  
36  
37  
38  
39  
40  
41  
42  
43  
44  
45  
46  
47

\* Weight stable (>-1 to <1 BMI unit) was used as the reference group.

Model 1 is adjusted for: maternal age, ethnicity, highest educational qualification, whether undergone infertility treatment, smoking status, employment status and infant gender

Model 2 is adjusted for: maternal age, ethnicity, highest educational qualification, whether undergone infertility treatment, smoking status, employment status, infant gender, baseline BMI and gestational diabetes in current pregnancy

Model 3 is adjusted for: maternal age, ethnicity, highest educational qualification, whether undergone infertility treatment, smoking status, employment status, infant gender, baseline BMI, gestational diabetes in current pregnancy and inter-pregnancy interval

For peer review only

Table 5: Logistic regression models testing the association between the risk of LGA birth in the second pregnancy following a non-LGA birth in the first pregnancy and change in maternal body mass index (BMI) measured at the first antenatal visit of each pregnancy stratified by BMI category in first pregnancy

|            | Maternal BMI change (categorised)            | First to second pregnancy |                         |        |                                |                         |      |                                  |                         |        |                               |                         |      |                          |                         |      |
|------------|----------------------------------------------|---------------------------|-------------------------|--------|--------------------------------|-------------------------|------|----------------------------------|-------------------------|--------|-------------------------------|-------------------------|------|--------------------------|-------------------------|------|
|            |                                              | Full sample               |                         |        | Underweight at first pregnancy |                         |      | Normal weight at first pregnancy |                         |        | Overweight at first pregnancy |                         |      | Obese at first pregnancy |                         |      |
|            |                                              | n                         | Odds ratio, OR (95% CI) | p      | n                              | Odds ratio, OR (95% CI) | p    | n                                | Odds ratio, OR (95% CI) | p      | n                             | Odds ratio, OR (95% CI) | p    | n                        | Odds ratio, OR (95% CI) | p    |
| Unadjusted | Lost <= -1 BMI units from previous pregnancy | 14788                     | 1.06<br>0.90 to 1.24    | 0.51   | 585                            | -                       | -    | 8888                             | 0.87<br>0.68 to 1.12    | 0.29   | 3458                          | 0.95<br>0.70 to 1.28    | 0.72 | 1836                     | 0.89<br>0.62 to 1.27    | 0.52 |
|            | Gained >=1 BMI units from previous pregnancy |                           | 1.30<br>1.16 to 1.46    | <0.001 |                                | 1.78<br>0.73 to 4.35    | 0.21 |                                  | 1.29<br>1.10 to 1.50    | 0.001  |                               | 1.24<br>0.98 to 1.56    | 0.07 |                          | 1.01<br>0.74 to 1.37    | 0.97 |
| Model 1    | Lost <= -1 BMI units from previous pregnancy | 14215                     | 1.08<br>0.92 to 1.28    | 0.34   | 540                            | -                       | -    | 8513                             | 0.92<br>0.71 to 1.19    | 0.53   | 3326                          | 0.98<br>0.72 to 1.33    | 0.89 | 1795                     | 0.87<br>0.60 to 1.25    | 0.44 |
|            | Gained >=1 BMI units from previous pregnancy |                           | 1.36<br>1.21 to 1.54    | <0.001 |                                | 1.41<br>0.54 to 3.67    | 0.48 |                                  | 1.38<br>1.17 to 1.62    | <0.001 |                               | 1.30<br>1.02 to 1.65    | 0.03 |                          | 1.02<br>0.75 to 1.40    | 0.89 |
| Model 2    | Lost <= -1 BMI units from previous pregnancy | 14215                     | 0.93<br>0.78 to 1.10    | 0.40   | 531                            | -                       | -    | 8513                             | 0.87<br>0.67 to 1.13    | 0.30   | 3326                          | 0.97<br>0.71 to 1.32    | 0.84 | 1795                     | 0.84<br>0.58 to 1.21    | 0.35 |
|            | Gained >=1 BMI units from previous pregnancy |                           | 1.29<br>1.14 to 1.45    | <0.001 |                                | 1.43<br>0.55 to 3.71    | 0.47 |                                  | 1.36<br>1.16 to 1.60    | <0.001 |                               | 1.29<br>1.02 to 1.64    | 0.04 |                          | 1.00<br>0.73 to 1.38    | 0.98 |
| Model 3    | Lost <= -1 BMI units from previous pregnancy | 14215                     | 0.93<br>0.79 to 1.11    | 0.43   | 531                            | -                       | -    | 8513                             | 0.87<br>0.67 to 1.13    | 0.30   | 3326                          | 0.97<br>0.71 to 1.32    | 0.86 | 1795                     | 0.87<br>0.60 to 1.26    | 0.47 |
|            | Gained >=1 BMI units from previous pregnancy |                           | 1.30                    | <0.001 |                                | 1.39                    | 0.51 |                                  | 1.37                    | <0.001 |                               | 1.30                    | 0.03 |                          | 1.05                    | 0.77 |



1  
2  
3  
4  
5  
6  
7  
8  
9  
10  
11  
12  
13  
14  
15  
16  
17  
18  
19  
20  
21  
22  
23  
24  
25  
26  
27  
28  
29  
30  
31  
32  
33  
34  
35  
36  
37  
38  
39  
40  
41  
42  
43  
44  
45  
46  
47

|  |                                         |  |                 |  |  |                 |  |  |                 |  |  |                 |  |  |                 |  |
|--|-----------------------------------------|--|-----------------|--|--|-----------------|--|--|-----------------|--|--|-----------------|--|--|-----------------|--|
|  | BMI units<br>from previous<br>pregnancy |  | 1.15 to<br>1.47 |  |  | 0.53 to<br>3.68 |  |  | 1.16 to<br>1.61 |  |  | 1.02 to<br>1.65 |  |  | 0.76 to<br>1.44 |  |
|--|-----------------------------------------|--|-----------------|--|--|-----------------|--|--|-----------------|--|--|-----------------|--|--|-----------------|--|

\* Weight stable (>-1 to <1 BMI unit) was used as the reference group.

Model 1 is adjusted for: maternal age, ethnicity, highest educational qualification, whether undergone infertility treatment, smoking status, employment status and infant gender

Model 2 is adjusted for: maternal age, ethnicity, highest educational qualification, whether undergone infertility treatment, smoking status, employment status, infant gender, baseline BMI and gestational diabetes in current pregnancy

Model 3 is adjusted for: maternal age, ethnicity, highest educational qualification, whether undergone infertility treatment, smoking status, employment status, infant gender, baseline BMI, gestational diabetes in current pregnancy and inter-pregnancy interval

peer review only

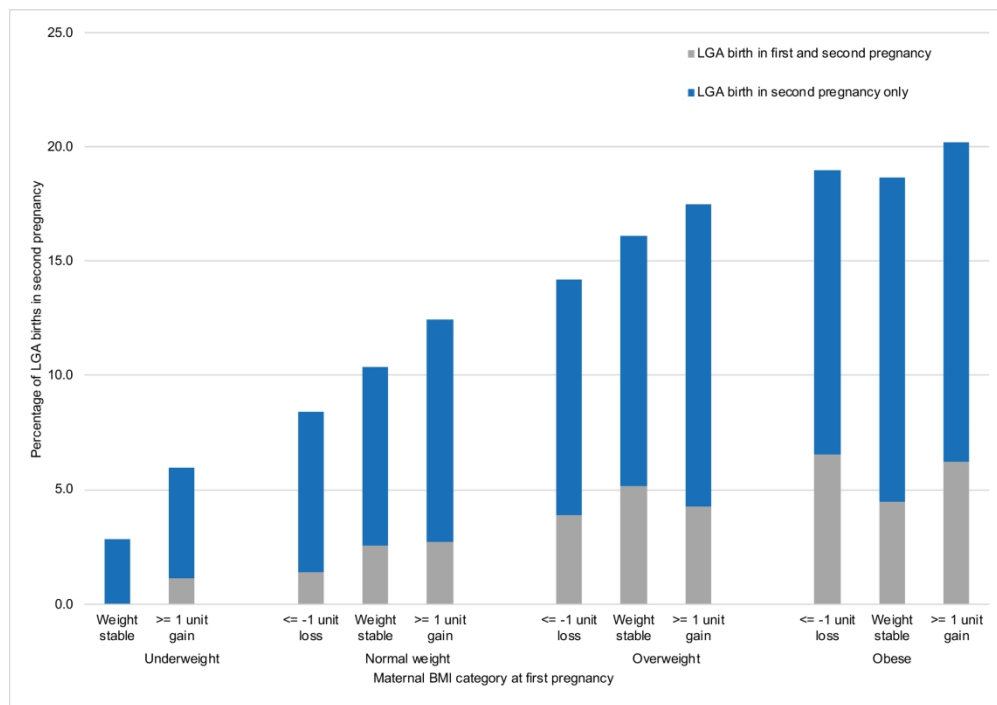

Figure 1: The percentage of LGA births in second pregnancy stratified by maternal BMI category and previous outcome of LGA

203x142mm (300 x 300 DPI)

# Reporting checklist for cohort study.

Based on the STROBE cohort guidelines.

## Instructions to authors

Complete this checklist by entering the page numbers from your manuscript where readers will find each of the items listed below.

Your article may not currently address all the items on the checklist. Please modify your text to include the missing information. If you are certain that an item does not apply, please write "n/a" and provide a short explanation.

Upload your completed checklist as an extra file when you submit to a journal.

In your methods section, say that you used the STROBE cohort reporting guidelines, and cite them as:

von Elm E, Altman DG, Egger M, Pocock SJ, Gøtzsche PC, Vandenbroucke JP. The Strengthening the Reporting of Observational Studies in Epidemiology (STROBE) Statement: guidelines for reporting observational studies.

|                        |     | Reporting Item                                                                                                                  | Page Number |
|------------------------|-----|---------------------------------------------------------------------------------------------------------------------------------|-------------|
| Title                  | #1a | Indicate the study's design with a commonly used term in the title or the abstract                                              | 1 and 2     |
| Abstract               | #1b | Provide in the abstract an informative and balanced summary of what was done and what was found                                 | 2           |
| Background / rationale | #2  | Explain the scientific background and rationale for the investigation being reported                                            | 3-4         |
| Objectives             | #3  | State specific objectives, including any prespecified hypotheses                                                                | 4           |
| Study design           | #4  | Present key elements of study design early in the paper                                                                         | 4           |
| Setting                | #5  | Describe the setting, locations, and relevant dates, including periods of recruitment, exposure, follow-up, and data collection | 4           |
| Eligibility criteria   | #6a | Give the eligibility criteria, and the sources and methods of selection of participants. Describe methods of follow-up.         | 4           |

|    |                  |      |                                                                   |     |
|----|------------------|------|-------------------------------------------------------------------|-----|
| 1  |                  | #6b  | For matched studies, give matching criteria and number of         | n/a |
| 2  |                  |      | exposed and unexposed                                             |     |
| 3  |                  |      |                                                                   |     |
| 4  | Variables        | #7   | Clearly define all outcomes, exposures, predictors, potential     | 4-5 |
| 5  |                  |      | confounders, and effect modifiers. Give diagnostic criteria, if   |     |
| 6  |                  |      | applicable                                                        |     |
| 7  |                  |      |                                                                   |     |
| 8  |                  |      |                                                                   |     |
| 9  |                  |      |                                                                   |     |
| 10 | Data sources /   | #8   | For each variable of interest give sources of data and details of | 4-5 |
| 11 | measurement      |      | methods of assessment (measurement). Describe                     |     |
| 12 |                  |      | comparability of assessment methods if there is more than one     |     |
| 13 |                  |      | group. Give information separately for for exposed and            |     |
| 14 |                  |      | unexposed groups if applicable.                                   |     |
| 15 |                  |      |                                                                   |     |
| 16 |                  |      |                                                                   |     |
| 17 |                  |      |                                                                   |     |
| 18 | Bias             | #9   | Describe any efforts to address potential sources of bias         | n/a |
| 19 |                  |      |                                                                   |     |
| 20 | Study size       | #10  | Explain how the study size was arrived at                         | 4   |
| 21 |                  |      |                                                                   |     |
| 22 |                  |      |                                                                   |     |
| 23 | Quantitative     | #11  | Explain how quantitative variables were handled in the            | 4-5 |
| 24 | variables        |      | analyses. If applicable, describe which groupings were chosen,    |     |
| 25 |                  |      | and why                                                           |     |
| 26 |                  |      |                                                                   |     |
| 27 |                  |      |                                                                   |     |
| 28 | Statistical      | #12a | Describe all statistical methods, including those used to control | 5   |
| 29 | methods          |      | for confounding                                                   |     |
| 30 |                  |      |                                                                   |     |
| 31 |                  |      |                                                                   |     |
| 32 |                  | #12b | Describe any methods used to examine subgroups and                | 5   |
| 33 |                  |      | interactions                                                      |     |
| 34 |                  |      |                                                                   |     |
| 35 |                  |      |                                                                   |     |
| 36 |                  | #12c | Explain how missing data were addressed                           | n/a |
| 37 |                  |      |                                                                   |     |
| 38 |                  | #12d | If applicable, explain how loss to follow-up was addressed        | n/a |
| 39 |                  |      |                                                                   |     |
| 40 |                  |      |                                                                   |     |
| 41 |                  | #12e | Describe any sensitivity analyses                                 | n/a |
| 42 |                  |      |                                                                   |     |
| 43 | Participants     | #13a | Report numbers of individuals at each stage of study—eg           | 5   |
| 44 |                  |      | numbers potentially eligible, examined for eligibility, confirmed |     |
| 45 |                  |      | eligible, included in the study, completing follow-up, and        |     |
| 46 |                  |      | analysed. Give information separately for for exposed and         |     |
| 47 |                  |      | unexposed groups if applicable.                                   |     |
| 48 |                  |      |                                                                   |     |
| 49 |                  |      |                                                                   |     |
| 50 |                  |      |                                                                   |     |
| 51 |                  | #13b | Give reasons for non-participation at each stage                  | n/a |
| 52 |                  |      |                                                                   |     |
| 53 |                  | #13c | Consider use of a flow diagram                                    | n/a |
| 54 |                  |      |                                                                   |     |
| 55 |                  |      |                                                                   |     |
| 56 | Descriptive data | #14a | Give characteristics of study participants (eg demographic,       | 5-6 |
| 57 |                  |      | clinical, social) and information on exposures and potential      |     |
| 58 |                  |      |                                                                   |     |
| 59 |                  |      |                                                                   |     |
| 60 |                  |      |                                                                   |     |

|    |                  |                                                                        |          |
|----|------------------|------------------------------------------------------------------------|----------|
| 1  |                  | confounders. Give information separately for exposed and               |          |
| 2  |                  | unexposed groups if applicable.                                        |          |
| 3  |                  |                                                                        |          |
| 4  |                  | #14b Indicate number of participants with missing data for each        | 13-14    |
| 5  |                  | variable of interest                                                   |          |
| 6  |                  |                                                                        |          |
| 7  |                  | #14c Summarise follow-up time (eg, average and total amount)           | n/a      |
| 8  |                  |                                                                        |          |
| 9  |                  |                                                                        |          |
| 10 | Outcome data     | #15 Report numbers of outcome events or summary measures               | 5-6, 13- |
| 11 |                  | over time. Give information separately for exposed and                 | 14       |
| 12 |                  | unexposed groups if applicable.                                        |          |
| 13 |                  |                                                                        |          |
| 14 |                  |                                                                        |          |
| 15 | Main results     | #16a Give unadjusted estimates and, if applicable, confounder-         | 6-7, 15- |
| 16 |                  | adjusted estimates and their precision (eg, 95% confidence             | 21       |
| 17 |                  | interval). Make clear which confounders were adjusted for and          |          |
| 18 |                  | why they were included                                                 |          |
| 19 |                  |                                                                        |          |
| 20 |                  |                                                                        |          |
| 21 |                  |                                                                        |          |
| 22 |                  | #16b Report category boundaries when continuous variables were         | 4-5, 13- |
| 23 |                  | categorized                                                            | 14       |
| 24 |                  |                                                                        |          |
| 25 |                  |                                                                        |          |
| 26 |                  | #16c If relevant, consider translating estimates of relative risk into | n/a      |
| 27 |                  | absolute risk for a meaningful time period                             |          |
| 28 |                  |                                                                        |          |
| 29 |                  |                                                                        |          |
| 30 | Other analyses   | #17 Report other analyses done—e.g., analyses of subgroups and         | n/a      |
| 31 |                  | interactions, and sensitivity analyses                                 |          |
| 32 |                  |                                                                        |          |
| 33 |                  |                                                                        |          |
| 34 | Key results      | #18 Summarise key results with reference to study objectives           | 7        |
| 35 |                  |                                                                        |          |
| 36 | Limitations      | #19 Discuss limitations of the study, taking into account sources of   | 8-9      |
| 37 |                  | potential bias or imprecision. Discuss both direction and              |          |
| 38 |                  | magnitude of any potential bias.                                       |          |
| 39 |                  |                                                                        |          |
| 40 |                  |                                                                        |          |
| 41 | Interpretation   | #20 Give a cautious overall interpretation considering objectives,     | 9        |
| 42 |                  | limitations, multiplicity of analyses, results from similar studies,   |          |
| 43 |                  | and other relevant evidence.                                           |          |
| 44 |                  |                                                                        |          |
| 45 |                  |                                                                        |          |
| 46 | Generalisability | #21 Discuss the generalisability (external validity) of the study      | 8-9      |
| 47 |                  | results                                                                |          |
| 48 |                  |                                                                        |          |
| 49 |                  |                                                                        |          |
| 50 | Funding          | #22 Give the source of funding and the role of the funders for the     | 10       |
| 51 |                  | present study and, if applicable, for the original study on which      |          |
| 52 |                  | the present article is based                                           |          |
| 53 |                  |                                                                        |          |
| 54 |                  |                                                                        |          |
| 55 |                  |                                                                        |          |

The STROBE checklist is distributed under the terms of the Creative Commons Attribution License CC-BY. This checklist was completed on 22. August 2018 using <http://www.goodreports.org/>, a tool made by the [EQUATOR Network](#) in collaboration with [Penelope.ai](#)

# BMJ Open

## Is maternal weight gain between pregnancies associated with risk of large-for-gestational age birth? Analysis of a UK population-based cohort

|                                 |                                                                                                                                                                                                                                                                                                                                                                                                                                                                                                                                                                                                                                                                                                                                                                               |
|---------------------------------|-------------------------------------------------------------------------------------------------------------------------------------------------------------------------------------------------------------------------------------------------------------------------------------------------------------------------------------------------------------------------------------------------------------------------------------------------------------------------------------------------------------------------------------------------------------------------------------------------------------------------------------------------------------------------------------------------------------------------------------------------------------------------------|
| Journal:                        | <i>BMJ Open</i>                                                                                                                                                                                                                                                                                                                                                                                                                                                                                                                                                                                                                                                                                                                                                               |
| Manuscript ID                   | bmjopen-2018-026220.R1                                                                                                                                                                                                                                                                                                                                                                                                                                                                                                                                                                                                                                                                                                                                                        |
| Article Type:                   | Research                                                                                                                                                                                                                                                                                                                                                                                                                                                                                                                                                                                                                                                                                                                                                                      |
| Date Submitted by the Author:   | 03-Dec-2018                                                                                                                                                                                                                                                                                                                                                                                                                                                                                                                                                                                                                                                                                                                                                                   |
| Complete List of Authors:       | Ziauddeen, Nida; University of Southampton, Academic unit of Primary Care and Population Sciences, Faculty of Medicine<br>Wilding, Sam; University of Southampton, Academic unit of Primary Care and Population Sciences, Faculty of Medicine<br>Roderick, Paul; University of Southampton, Academic unit of Primary Care and Population Sciences, Faculty of Medicine<br>Macklon, Nicholas; University of Copenhagen, Zealand University Hospital, Department of Obstetrics and Gynaecology; London Women's Clinic<br>Alwan, Nisreen; University of Southampton, Academic unit of Primary Care and Population Sciences, Faculty of Medicine; University of Southampton and University Hospital Southampton NHS Foundation Trust, NIHR Southampton Biomedical Research Centre |
| <b>Primary Subject Heading</b>: | Epidemiology                                                                                                                                                                                                                                                                                                                                                                                                                                                                                                                                                                                                                                                                                                                                                                  |
| Secondary Subject Heading:      | Epidemiology, Public health                                                                                                                                                                                                                                                                                                                                                                                                                                                                                                                                                                                                                                                                                                                                                   |
| Keywords:                       | obesity, pregnancy, pregnancy outcome, weight gain, large-for-gestational age                                                                                                                                                                                                                                                                                                                                                                                                                                                                                                                                                                                                                                                                                                 |
|                                 |                                                                                                                                                                                                                                                                                                                                                                                                                                                                                                                                                                                                                                                                                                                                                                               |

SCHOLARONE™  
Manuscripts

1  
2  
3 1 **Is maternal weight gain between pregnancies associated with risk of large-for-**  
4 2 **gestational age birth? Analysis of a UK population-based cohort**  
5  
6 3

7 4 Nida Ziauddeen<sup>1</sup>, Sam Wilding<sup>1</sup>, Paul J. Roderick<sup>1</sup>, Nicholas S. Macklon<sup>2,3</sup>, Nisreen A.  
8 5 Alwan<sup>1,4</sup>  
9  
10 6

11 7 <sup>1</sup> Academic Unit of Primary Care and Population Sciences, Faculty of Medicine, University of  
12 8 Southampton, Southampton, UK

13 9 <sup>2</sup> Department of Obstetrics and Gynaecology, University of Copenhagen, Zealand University  
14 10 Hospital, Roskilde 4000, Denmark

15 11 <sup>3</sup> London Women's Clinic, 113-115 Harley Street, London W1G 6AP

16 12 <sup>4</sup> NIHR Southampton Biomedical Research Centre, University of Southampton and  
17 13 University Hospital Southampton NHS Foundation Trust, Southampton SO16 6YD, UK  
18  
19  
20  
21  
22  
23  
24  
25  
26  
27  
28  
29  
30  
31  
32  
33  
34  
35  
36  
37  
38  
39  
40  
41  
42  
43  
44  
45  
46  
47  
48  
49  
50  
51  
52  
53  
54  
55  
56  
57  
58  
59  
60

16 Author emails: N.Ziauddeen@soton.ac.uk, S.A.Wilding@soton.ac.uk, pjr@soton.ac.uk,  
17 nism@regionsjaelland.dk, N.A.Alwan@soton.ac.uk

20 Corresponding author: Nida Ziauddeen

21 Academic Unit of Primary Care and Population Sciences, Faculty of Medicine, Mailpoint 805,  
22 Level C (AC22), South Academic Block, Southampton General Hospital, Tremona Road,  
23 Southampton SO16 6YD, UK

24 Email: N.Ziauddeen@soton.ac.uk

25 Telephone number: 023 81 206287

28 **Keywords:** obesity, pregnancy, pregnancy outcome, weight gain, birth weight

29 **Word count:** 4206 words



## 34 Abstract

35 **Objective:** Maternal overweight and obesity during pregnancy increases the risk of large-for-  
36 gestational age (LGA) birth and childhood obesity. We aimed to investigate the association  
37 between maternal weight change between subsequent pregnancies and risk of having a  
38 LGA birth.

39 **Design:** Population-based cohort.

40 **Setting:** Routinely collected antenatal healthcare data between January 2003 and  
41 September 2017 at University Hospital Southampton, England.

42 **Participants:** Health records of women with their first two consecutive singleton live-birth  
43 pregnancies were analysed (n=15940).

44 **Primary outcome measure:** Risk of LGA, recurrent LGA and 'new' LGA births in the  
45 second pregnancy.

46 **Results:** Of the 15940 women included, 16.0% lost and 47.7% gained weight ( $\geq 1$  kg/m<sup>2</sup>)  
47 between pregnancies. A lower proportion of babies born to women who lost  $\geq 1$  kg/m<sup>2</sup>  
48 (12.4%) and remained weight stable between -1 to 1 kg/m<sup>2</sup> (11.9%) between pregnancies  
49 were LGA compared to 13.5% and 15.9% in women who gained 1-3 and  $\geq 3$  kg/m<sup>2</sup>  
50 respectively. Overweight women were at lower risk of recurrent LGA in the second  
51 pregnancy if they lost  $\geq 1$  kg/m<sup>2</sup> (adjusted risk ratio (aRR) 0.69, 95% CI 0.48 to 0.97)  
52 whereas overweight women who gained weight ( $\geq 3$  kg/m<sup>2</sup>) were at increased risk of 'new'  
53 LGA after having a non-LGA birth in their first pregnancy (aRR 1.35, 95% CI 1.05 to 1.75).  
54 Normal-weight women who gained weight were also at increased risk of 'new' LGA in the  
55 second pregnancy (aRR 1.26, 95% CI 1.06 to 1.50 with weight gain of 1-3 kg/m<sup>2</sup> and aRR  
56 1.34, 95% CI 1.09 to 1.65 with gain of  $\geq 3$  kg/m<sup>2</sup>).

57 **Conclusions:** Losing weight after an LGA birth reduced the risk of recurrent LGA in the next  
58 pregnancy in overweight women, while gaining weight increased LGA risk in women with no  
59 previous history of LGA birth. Preventing weight gain between pregnancies is an important  
60 prevention measure to achieve better maternal and offspring outcomes.

61

62

## 63 Article summary

### 64 Strengths and limitations of this study

- 65 • Utilises antenatal care and birth data from a large population-based cohort including  
66 women from all socioeconomic backgrounds
- 67 • Objective measurement of both exposure (maternal weight) and outcome in two  
68 pregnancies per woman
- 69 • Self-reported data for covariables
- 70 • Lack of information on breastfeeding and maternal weight gain during pregnancy

71

72

73

74

## 75 Introduction

76 The prevalence of maternal obesity has been rising over time. It has more than doubled in  
77 England between 1989 and 2007 (7.6% to 15.6%), with the proportion of normal weight  
78 pregnancies showing a 12% decrease from 65.6% to 53.6%<sup>1</sup>. Maternal overweight and  
79 obesity is a key risk factor for adverse maternal and birth outcomes. It also increases the risk  
80 of long-term health problems in the child including obesity, cardiovascular disease, diabetes  
81 and cognitive and behavioural disorders<sup>2</sup>. Birthweight is a key early life predictor of long-term  
82 health outcomes such as obesity and cardiovascular disease<sup>3</sup> and potentially acts as a  
83 mediator on the causal pathway between maternal obesity and long-term offspring  
84 outcomes. The incidence of large-for-gestational age (LGA) birth, defined as >90th  
85 percentile weight for gestational age, has increased over time in high-income countries<sup>4,5</sup>.  
86 LGA is associated with both childhood<sup>6,7</sup> and adult obesity<sup>8-10</sup>. A key risk factor for LGA birth  
87 is gestational diabetes (GDM)<sup>11</sup>, the incidence of which has also increased over time<sup>12,13</sup>.  
88 Offspring of mothers with gestational diabetes have increased risk of childhood overweight  
89 and obesity<sup>14,15</sup>. Maternal obesity is an established risk factor for both GDM and LGA birth<sup>16</sup>.  
90 Change in maternal body mass index (BMI) between pregnancies could modify the risk of  
91 LGA birth in the subsequent pregnancy.

92 Birthweight, on average, increases with parity. First-born infants tend to have the lowest  
93 birthweight among their younger siblings<sup>17-19</sup> up to the fourth pregnancy<sup>20</sup>. However,  
94 birthweight was found to decrease with parity for women who had short intervals between  
95 their pregnancies (<12 months) while the increase in birthweight with parity was more  
96 pronounced in women with long intervals (>24 months)<sup>20</sup>. Also, maternal weight change  
97 between pregnancies was found to modify the relationship between parity and birthweight.  
98 Women who returned to their pre-pregnancy weight before the next conception had infants  
99 who weighed less than infants of women who retained or gained weight between  
100 pregnancies<sup>20</sup>. In a UK-based study, women who lost at least six kilograms between their  
101 first and second pregnancy had a smaller average increase in birthweight of the second  
102 baby compared to women who gained ten kilograms or more (in a 1.60m tall woman, 6 kg  
103 equates to approximately 2.3 kg/m<sup>2</sup> and 10 kg to approximately 3.8 kg/m<sup>2</sup>)<sup>18</sup>.

104 A large US study showed that women were at an increased risk of having an LGA baby in  
105 the second pregnancy if their pre-pregnancy BMI category increased towards overweight or  
106 obese between their first and second pregnancies. This applied to all first pregnancy BMI  
107 categories, except underweight women who became normal weight by the start of their  
108 second pregnancy. Overweight and obese women who dropped BMI category by their  
109 second pregnancy remained at an increased risk of LGA birth, but had a lower risk  
110 compared to women whose BMI category increased between pregnancies<sup>21</sup>.

111 Another US-based study showed that inter-pregnancy weight gain of  $\geq 2$  kg/m<sup>2</sup> in obese  
112 women was associated with increased risk of LGA. Weight loss of  $\geq 2$  kg/m<sup>2</sup> was associated  
113 with a lower adjusted LGA risk compared to the women who maintained their weight within 2  
114 kg/m<sup>2</sup> change between pregnancies<sup>22</sup>.

115 Two studies found a reduced risk of 'new' LGA in the second pregnancy following a non-  
116 LGA birth in the first pregnancy with inter-pregnancy weight loss of  $>1$  kg/m<sup>2</sup>, and an  
117 increased risk with modest (1-3 kg/m<sup>2</sup>) and large ( $\geq 3$  kg/m<sup>2</sup>) weight gain. In stratified  
118 analysis, the association was stronger in women with a first pregnancy BMI of  $<25$  kg/m<sup>2</sup>  
119 <sup>23,24</sup>. A third study only found an increased risk of 'new' LGA in normal weight women who  
120 gained  $\geq 4$  kg/m<sup>2</sup> between pregnancies and no association in overweight women<sup>25</sup>.

121 To our knowledge, only one study has examined the risk of recurrent LGA (occurring in both  
122 first and second pregnancies) in relation to maternal weight change between pregnancies <sup>26</sup>.  
123 The study, conducted in Aberdeen, Scotland, included 24520 women of which 813 women  
124 had LGA births in both pregnancies. Inter-pregnancy weight gain ( $\geq 2$  kg/m<sup>2</sup>) was associated

1  
2  
3 125 with increased risk of recurrent LGA, while weight loss ( $\geq 2$  kg/m<sup>2</sup>) was protective. Women  
4 126 with BMI  $< 25$ kg/m<sup>2</sup> were at increased risk of recurrent LGA on gaining weight whereas  
5 127 women with BMI  $\geq 25$ kg/m<sup>2</sup> were at reduced risk of recurrent LGA on losing weight<sup>26</sup>.

7 128 In this study, we aimed to investigate the association between the incidence of LGA,  
8 129 recurrent LGA and 'new' LGA births in the second pregnancy and maternal change in BMI  
9 130 between the first and second pregnancies, stratifying by maternal BMI category in the first  
10 131 pregnancy, in a population-based cohort in the South of England.

12 132

14 133

## 16 134 **Methods**

18 135 This is a population-based cohort of prospectively collected routine healthcare data for  
19 136 antenatal care between January 2003 and September 2017 at University Hospital  
20 137 Southampton, Hampshire, UK. This included all women delivering at this hospital (n= 82098  
21 138 pregnancies), which is a regional centre for maternity care in and around Southampton.  
22 139 Records of women with their first two consecutive singleton live birth pregnancies were  
23 140 included. Records with unfeasible weight ( $< 30$ kg), height ( $> 2$ m) and gestational age ( $> 301$   
24 141 days) values were excluded.

26 142

### 28 143 *Exposure assessment*

30 144 Maternal weight in kilograms was routinely measured by a midwife at the first antenatal  
31 145 (booking) appointment of each pregnancy, which is recommended to take place ideally by 10  
32 146 weeks gestation in the UK, according to the National Institute for Health and Care  
33 147 Excellence Guidelines<sup>27</sup>. Any woman who had a booking appointment at or after 24 weeks  
34 148 of pregnancy was excluded. Height was self-reported. BMI was calculated as weight (in kg)  
35 149 divided by height (in metres) squared.

36 150 BMI at the start of the first pregnancy was categorised as underweight (BMI  $< 18.5$  kg/m<sup>2</sup>),  
37 151 normal weight (18.5 to 24.9 kg/m<sup>2</sup>), overweight (25.0 to 29.9 kg/m<sup>2</sup>) and obese ( $\geq 30$  kg/m<sup>2</sup>).  
38 152 Change in BMI was calculated as the difference in BMI measured at the booking  
39 153 appointments of the first two consecutive live birth pregnancies for each woman. This  
40 154 change in BMI was then categorised as weight loss ( $\geq 1$  kg/m<sup>2</sup>), weight stable ( $-1$  to 1 kg/m<sup>2</sup>)  
42 155 and two categories of weight gain ( $1-3$  kg/m<sup>2</sup> and  $\geq 3$  kg/m<sup>2</sup>).

44 156

### 46 157 *Outcome assessment*

47 158 Birthweight (grams) was measured by healthcare professionals at birth as part of routine  
48 159 care. Gestational age was based on a dating ultrasound scan which routinely takes place  
49 160 between 10 and 13 weeks gestation<sup>27</sup>. Age- and gender- specific birthweight centiles were  
50 161 calculated using reference values for England and Wales provided in the most recently  
51 162 released national data<sup>28</sup>. Large-for-gestational age was defined as  $> 90$ th percentile weight  
52 163 for gestational age. This was only defined for babies born between 24 to 42 weeks gestation  
53 164 as reference values only exist for these gestational ages and with determinate gender.

55 165

### 57 166 *Covariables*

58 167 Maternal date of birth is recorded at the booking appointment and converted to age (in  
59 168 years) on extraction of the dataset to maintain anonymity. Highest maternal educational

1  
2  
3 169 qualification was self-reported and categorised as primary, secondary, college,  
4 170 undergraduate, postgraduate, graduate and none. For the purposes of this analysis, this was  
5 171 condensed to three categories - secondary (GCSE) and under, college (A levels) and  
6 172 university degree or above. Self-reported ethnicity was recorded under 16 categories and  
7 173 condensed to White, Mixed, Asian, Black/African/Caribbean and Other. Categories of not  
8 174 asked and not stated were coded as missing. Smoking was self-reported as current smoking  
9 175 or non-smoking. Non-smokers were further asked if they had ever smoked or had previously  
10 176 smoked and quit. This was categorised as stopped more than 12 months before conception,  
11 177 stopped less than 12 months before conception or stopped when pregnancy confirmed.  
12 178 Employment status was self-reported at booking appointment and categorised as employed,  
13 179 unemployed, in education, and not specified. Infertility treatment was categorised as  
14 180 no/investigations only and yes (hormonal only, in-vitro fertilisation, gamete intrafallopian  
15 181 transfer and other surgical) in either one or both pregnancies. In this population, an oral  
16 182 glucose tolerance test was used for screening for GDM in women with one or more risk  
17 183 factors (BMI > 30kg/m<sup>2</sup>; GDM in previous pregnancy; previous baby weighing ≥4.5kg;  
18 184 diabetes in parents or siblings and of Asian, African-Caribbean or Middle Eastern  
19 185 ethnicity)<sup>29</sup>. GDM diagnosis was then reported in the database. Inter-pregnancy interval was  
20 186 defined as the interval between the first live birth and conception of the second pregnancy.  
21 187 The difference in days between two consecutive live births was calculated and gestational  
22 188 age of the latter birth subtracted from this to derive the inter-pregnancy interval.

25 189

### 27 190 *Statistical analysis*

28  
29 191 All analysis was performed using Stata 15<sup>30</sup>. Univariable comparisons were carried out using  
30 192 ANOVA for continuous variables and chi square test for categorical variables. Generalised  
31 193 linear regression with log link<sup>31</sup> was used to examine the association between the  
32 194 categorised variable of maternal change in BMI between pregnancies with risk of LGA in the  
33 195 second pregnancy. This was analysed first in the whole sample and then stratified by  
34 196 'baseline' maternal BMI category as calculated in the first antenatal appointment of the first  
35 197 pregnancy.

37 198 Risk of LGA in the second pregnancy was explored in the whole sample adjusting for  
38 199 previous pregnancy outcome of LGA. The risk of 'new' LGA in second pregnancy after  
39 200 having a non-LGA baby in the first pregnancy was explored in the sub-sample of women  
40 201 who had non-LGA births in the first pregnancy. The risk of recurrent LGA (LGA in both  
41 202 pregnancies) was explored in a sub-sample of women who had LGA births in the first  
42 203 pregnancy.

44  
45 204 Initial univariable analysis was followed by multivariable models adjusting for potential  
46 205 confounding factors – maternal age, ethnicity, highest educational qualification, whether or  
47 206 not undergone infertility treatment, employment status, smoking behaviour in second  
48 207 pregnancy, baseline BMI, GDM in second pregnancy and inter-pregnancy interval.  
49 208 Sensitivity analysis was conducted adding gestational age at booking in the second  
50 209 pregnancy to the models.

51  
52 210 A statistical significance level of 0.05 with 95% confidence intervals was used in the  
53 211 regression models.

54 212

### 56 213 *Ethical considerations*

57  
58 214 All data were fully anonymised by the data holder before being accessed by the research  
59 215 team. Ethics approval was granted by the University of Southampton Faculty of Medicine  
60 216 Ethics Committee: study ID 25508.



217

## 218 *Patient and Public Involvement*

219 Patients and public were not involved in setting the research question or the outcome  
220 measures, nor were they involved in developing plans for the design or implementation of  
221 the study. However, pregnant woman and mothers of young children have been involved in  
222 the planning stages of a research project building on this analysis.

223

224

## 225 **Results**

226 The first and second pregnancies of 15940 women were included. Of these, 16.0% of  
227 women lost  $\geq 1$  kg/m<sup>2</sup>, 36.3% remained weight stable ( $-1$  to  $1$  kg/m<sup>2</sup>), 27.9% gained 1-3 kg/m<sup>2</sup>  
228 and 19.8% gained  $\geq 3$  kg/m<sup>2</sup> between their first and second live birth pregnancies. Weight  
229 loss of  $>2$  kg/m<sup>2</sup> was observed in 7.3% of women whereas 10.7% gained  $>2$  kg/m<sup>2</sup>. Mean  
230 BMI at second pregnancy booking was 30.8 kg/m<sup>2</sup> (standard deviation (SD) 5.9) in women  
231 who gained  $\geq 3$  kg/m<sup>2</sup>, 25.9 kg/m<sup>2</sup> (SD 4.7) in women who gained 1-3kg/m<sup>2</sup>, 24.1 kg/m<sup>2</sup> (SD  
232 5.1) in women who lost weight, and 23.8 kg/m<sup>2</sup> (SD 4.4) women whose weight remained  
233 stable between pregnancies ( $p < 0.001$ ) (Table 1).

234 Women who gained  $\geq 3$  kg/m<sup>2</sup> by the start of their second pregnancy were more likely to be  
235 smokers, unemployed, with lower educational attainment and to have a longer inter-  
236 pregnancy interval, compared to those who maintained a stable weight between  
237 pregnancies. Mean maternal age was lowest in the women who gained  $\geq 3$  kg/m<sup>2</sup> (27.3  
238 years, SD 5.5) and highest in the women who remained weight stable (29.8 years, SD 5.3).  
239 Mean maternal age in women who lost weight was 28.7 years (SD 5.4).

240 Mothers who gained  $\geq 3$  kg/m<sup>2</sup> were more likely to be obese (48.3%) at the start of the  
241 second pregnancy compared to 16.1% in women who gained 1-3 kg/m<sup>2</sup>, 9.2% in women  
242 who remained weight stable and 11.9% in women who lost  $\leq 1$  kg/m<sup>2</sup>.

243 A lower proportion of babies born to women who lost weight (12.4%) or remained weight  
244 stable (11.9%) between pregnancies were LGA compared to 13.5% in women who gained 1-  
245 3 kg/m<sup>2</sup> and 15.9% in women who gained  $\geq 3$  kg/m<sup>2</sup> ( $p < 0.001$ ) (Table 1, Figure 1). Compared  
246 to normal weight women, overweight and obese women were at increased risk of LGA births  
247 in both pregnancies with risk highest in obese women (unadjusted relative risk (RR) 2.06,  
248 95% CI 1.78 to 2.38 and 1.86, 95% CI 1.69 to 2.05 in first and second pregnancy  
249 respectively). Figure 2 shows the percentage of all LGA as recurrent LGA or 'new' LGA in  
250 second pregnancy by the inter-pregnancy change in maternal BMI stratified by maternal BMI  
251 category calculated at the start of the first pregnancy. The lowest proportion of LGA births in  
252 the second pregnancy was in underweight women in the first pregnancy who remained  
253 weight stable (2.8%), while the highest was in obese women who gained  $\geq 3$  kg/m<sup>2</sup> (21.2%).  
254 Within BMI categories, recurrent LGA was lowest in normal weight and overweight women  
255 who lost weight and highest in obese women who gained 1-3 kg/m<sup>2</sup>.

256 Women who gained  $\geq 3$  kg/m<sup>2</sup> were at increased risk of LGA in the second pregnancy in the  
257 full sample compared to remaining weight stable (aRR 1.28, 95% CI 1.14 to 1.44) (Figure 1).  
258 There was a significantly reduced risk of recurrent LGA birth in the second pregnancy in  
259 overweight women who had a LGA infant in the first pregnancy and lost  $\geq 1$  kg/m<sup>2</sup> in weight  
260 (aRR 0.69, 95% CI 0.48 to 0.97) (Table 2). No association was observed between risk of  
261 recurrent LGA and maternal BMI change between pregnancies in underweight, normal  
262 weight and obese women.

1  
2  
3 263 There was an increased risk of 'new' LGA birth in the second pregnancy after having a non-  
4 264 LGA infant in the first pregnancy in normal weight women who gained 1-3 kg/m<sup>2</sup> (aRR 1.26,  
5 265 95% CI 1.06 to 1.50) and in normal weight and overweight women who had gained  $\geq 3$  kg/m<sup>2</sup>  
6 266 weight (aRR 1.34, 95% CI 1.09 to 1.65, aRR 1.35, 95% CI 1.05 to 1.75, respectively) (Table  
7 267 3). No association was observed between the risk of 'new' LGA in the second pregnancy  
8 268 and maternal BMI inter-pregnancy change in obese women.  
9

10 269

11 270

12  
13  
14 271 **Discussion**

15  
16 272 This study examined the association between change in women's BMI between their first  
17 273 and second live birth pregnancies and risk of LGA birth in the second pregnancy in a  
18 274 population-based cohort of 15940 women in the South of England. Almost half of the sample  
19 275 (48%) of women gained  $\geq 1$  kg/m<sup>2</sup> in the time between the first antenatal care visits during  
20 276 their first and second pregnancies. The proportion of LGA births was significantly higher in  
21 277 women with an inter-pregnancy weight gain of  $\geq 3$  kg/m<sup>2</sup> (16%) compared to women who lost  
22 278 weight (12%) and those who remained weight stable (12%) between pregnancies.  
23 279 Overweight women who lost  $\geq 1$  kg/m<sup>2</sup> had a reduced risk of recurrent LGA. Normal weight  
24 280 women who gained 1–3 kg/m<sup>2</sup> and both normal weight and overweight women who gained  
25 281  $\geq 3$  kg/m<sup>2</sup> between pregnancies had an increased risk of LGA birth in their second pregnancy  
26 282 after a non-LGA birth in the first.

27  
28  
29 283 Compared to the population-based Swedish cohort which carried out a similar analysis for  
30 284 LGA and other outcomes in 151025 women using data from 1992 to 2001, a lower  
31 285 proportion of women remained weight stable in our cohort (46% compared to 36%) and a  
32 286 higher proportion lost (11% compared to 16%) or gained (43% compared to 48%) weight.  
33 287 Amongst women who gained weight, a higher proportion gained  $\geq 3$  kg/m<sup>2</sup> in this cohort  
34 288 (20%) compared to the Swedish cohort (11%)<sup>23</sup>. Similarly, in comparison to a population-  
35 289 based cohort of 24520 women in Aberdeen, Scotland; for the period 1986 to 2013, a larger  
36 290 proportion of women in our study both lost and gained weight<sup>26</sup>. The differences could reflect  
37 291 the increase in the prevalence of maternal overweight and obesity over time since our data  
38 292 are more recent.

39  
40  
41 293 In the adjusted model utilising the full sample, we showed an increased risk of LGA in the  
42 294 second pregnancy for inter-pregnancy weight gain compared to weight remaining stable. In a  
43 295 population-based cohort in the US, women were found to be at increased risk of LGA in the  
44 296 second pregnancy if their pre-pregnancy BMI category changed towards overweight or  
45 297 obese from first to second pregnancy regardless of their BMI category in first pregnancy  
46 298 except in underweight women who increased to normal weight<sup>21</sup>. This study is different to  
47 299 ours in that it only examined risk in second pregnancy without adjustment for LGA outcome  
48 300 in first pregnancy. It also considered weight change as change in BMI category only, while  
49 301 we studied change in maternal BMI regardless of whether BMI category has changed or not  
50 302 in the second pregnancy.

51  
52 303 In obese women in the US, inter-pregnancy weight gain of  $\geq 2$  kg/m<sup>2</sup> was associated  
53 304 with increased risk of LGA and a weight loss of  $\geq 2$  kg/m<sup>2</sup> was associated with  
54 305 decreased risk compared to the reference group of weight maintained (between  $> -2$   
55 306 and  $< 2$  kg/m<sup>2</sup>)<sup>22</sup>. We found no association between weight change and risk of  
56 307 second pregnancy LGA in women who were obese at the start of their first  
57 308 pregnancy. This may be because obese women are already at increased risk of LGA  
58 309 births, and the average inter-pregnancy BMI change in this subgroup was not large  
60

310 enough to detect a further increase in risk. Greater efforts are needed for primary  
311 prevention of obesity in women of child bearing age and obese women need more effective  
312 weight loss strategies in inter-partum period to assess impact on LGA and other outcomes.

313 Risk of recurrent LGA was analysed in one previous study in Scotland which found that inter-  
314 pregnancy weight gain ( $\geq 2$  kg/m<sup>2</sup>) was associated with increased risk of recurrent LGA. In  
315 that study, weight loss ( $\geq 2$  kg/m<sup>2</sup>) was associated with reduced LGA risk. Stratification by  
316 first pregnancy BMI showed that women with BMI  $< 25$ kg/m<sup>2</sup> were at increased risk of  
317 recurrent LGA on gaining  $\geq 2$  kg/m<sup>2</sup> whereas women with BMI  $\geq 25$ kg/m<sup>2</sup> were at reduced risk  
318 of recurrent LGA on losing  $\geq 2$  kg/m<sup>2</sup> weight<sup>26</sup>. We showed a similar reduction in risk in  
319 overweight women who lost  $\geq 1$  BMI unit between pregnancies, but found no association in  
320 normal weight women. This difference in findings may be because the  $< 25$ kg/m<sup>2</sup> group in the  
321 previous Scottish study included underweight women whereas our stratified analysis  
322 examined normal weight women separately to underweight women.

323 We showed an increased risk of 'new' LGA in the second pregnancy (after a non-LGA birth  
324 in the first pregnancy) with inter-pregnancy weight gain compared to remaining weight  
325 stable. After stratification by BMI, we found that this association between inter-pregnancy  
326 weight gain and new LGA remained only in normal-weight and overweight women. The  
327 findings from this study are in line with findings with other studies in Scotland<sup>24</sup> and  
328 Sweden<sup>23</sup> which found increased risk of 'new' LGA with modest (1-3 kg/m<sup>2</sup>) and large ( $\geq 3$   
329 kg/m<sup>2</sup>) weight gain. Both studies also found a decreased risk with inter-pregnancy weight  
330 loss of  $> 1$  kg/m<sup>2</sup> which was not found in our study. Both studies stratified BMI as  $<$  and  
331  $\geq 25$ kg/m<sup>2</sup>, while we further stratified the  $\geq 25$ kg/m<sup>2</sup> category as overweight (BMI 25-  
332 29.9kg/m<sup>2</sup>) and obese ( $\geq 30$ kg/m<sup>2</sup>) and found an increased risk of 'new' LGA in overweight,  
333 but not in obese women. We carried out sensitivity analysis merging overweight and obese  
334 categories and found increased risk in this category (data not shown) suggesting that the  
335 results are comparable to previous studies.

336 Women included in this analysis had a range of inter-pregnancy interval of less than 1 to up  
337 to 12 years and thus weight change could be due to postpartum weight retention or late  
338 postpartum weight gain. There is evidence that women who do not lose pregnancy weight at  
339 one year postpartum are more likely to retain weight longer term<sup>32</sup>. We examined the risk of  
340 maternal inter-pregnancy weight gain with length of the inter-pregnancy interval and found  
341 that women with an interval of 12-23 months were least likely to start the next pregnancy at a  
342 higher weight<sup>33</sup>. We also examined the length of the inter-pregnancy interval as a predictor  
343 for LGA risk adjusting for inter-pregnancy weight change and found no association<sup>34</sup>.

344 The Development Origins of Health and Disease concept suggests that adverse exposures  
345 during development could lead to enhanced susceptibility in the foetus thus increasing the  
346 risk of non-communicable diseases in later life. Although the focus has previously been on  
347 exposures during pregnancy, the importance of the preconception period is now  
348 recognised<sup>35-37</sup>. Efforts to systematically identify women in the preconception period to  
349 improve health and lifestyle during conception are underway<sup>37</sup>. Promoting health of all  
350 women of child-bearing age with targeting of women and partners planning a pregnancy has  
351 been identified as an effective approach to improving preconception health<sup>36</sup>. It is difficult to  
352 identify all women who are planning a pregnancy but as the inter-conception period is also  
353 the preconception period for the next pregnancy, it is important to engage with women  
354 during this period to optimise their and their children's health.

355 Future research that characterises the predictors of postpartum weight change would help  
356 design interventions to support postpartum weight loss and prevent weight gain. Key to this  
357 is an understanding of the pattern of weight change during this period as well as identifying  
358 the optimal setting and delivery of the intervention. Support with healthy eating and physical  
359 activity is more commonly received during pregnancy than after birth. Even when lifestyle



advice is received postpartum, it was found not to be associated with healthy diet or physical activity behaviours<sup>38</sup>. Most interventions that have been successful in limiting and promoting postpartum weight loss were combined diet and physical activity interventions with self-monitoring<sup>39</sup>. However, the timing of engaging women and length of intervention or engagement are important with one study showing that an intervention from 16 weeks pregnancy to six months postpartum was more effective than the same intervention from birth to six months postpartum intervention<sup>40</sup>.

As pregnancy and early postpartum is a period of major change for women and their families, interventions need to be carefully designed to be attractive, flexible, affordable and feasible for women at this stage with competing priorities and time demands. Focus during the postpartum period in the UK healthcare system is mostly on child health and development. The feasibility and effectiveness of better utilising contact time with health professionals during the two years after birth to engage and support maternal health needs to be explored. There may also be a role for mutual support groups for mothers. There is additionally a need to recognise that weight management issues are greater in more disadvantaged mothers so there is also the issue of identifying the most effective weight management strategies for such mothers to reduce social inequity in subsequent birth and maternal outcomes. Weight gain does not occur in isolation and usually combined with other risk factors particularly in socioeconomically disadvantaged groups and hence a holistic approach taking into account priority setting for these families should be considered.

### Strengths and limitations

This is a relatively large population-based cohort including women from all socioeconomic and ethnic backgrounds delivering at a large maternity centre in Southampton, UK, thus representative of the regional population. According to the UK Department of Communities and Local Government English indices of deprivation report, Southampton is more deprived than average with the situation having worsened between 2010 and 2015<sup>41</sup>. However, about half of the women included in this analysis reside in the rest of Hampshire (the region where Southampton is situated), which is less deprived. Our sample was 87% of White ethnicity, which is comparable to the 2011 England and Wales population census of 86% White<sup>42</sup>. The analysis was adjusted for several key confounders that were reasonably complete (96% complete for ethnicity and employment status). Both the maternal weight (used to calculate exposure) and birthweight in this study were objectively measured by healthcare professionals as part of routine antenatal and delivery care.

An important limitation was the lack of information on gestational weight gain during pregnancy, breastfeeding and paternal characteristics/behaviour, which are potential confounders in the association between maternal inter-pregnancy weight gain and LGA birth<sup>43</sup>. Women who had their first booking appointment later into the pregnancy (more than 24 weeks) were excluded from the analysis in order to ensure comparability of weight measurements between pregnancies. We also adjusted for gestational age at booking, as this was the point when maternal BMI was measured, in sensitivity analysis and the estimates remained similar. Some of the confounding factors which were accounted for in the analysis were self-reported, however the information was collected prospectively, therefore any measurement error is likely to be non-differential. Another limitation is that these findings are based on observational data so inferences about causation cannot be drawn and the risk of residual confounding influencing the results needs to be considered.

In conclusion, maternal weight gain of 1 or more kg/m<sup>2</sup> between first and second pregnancy had a prevalence of 48%, and it was associated with risk of LGA in the second pregnancy in this English cohort. Risk of 'new' LGA was higher in normal weight and overweight women who gained weight after a non-LGA birth in their first pregnancy compared to those who remained weight stable. Overweight women were at a lower risk of a recurrent LGA birth in

1  
2  
3 411 their second pregnancy if they lost weight between pregnancies. Greater efforts are needed  
4 412 for primary prevention of overweight and obesity in women of child bearing age. Supporting  
5 413 efforts to lose weight in overweight and obese women between pregnancies, and stop  
6 414 weight gain in all women planning to have further children (except those who are  
7 415 underweight) are important preventive measures of subsequent adverse maternal and  
8 416 offspring health outcomes.

9  
10 417

## 11 418 **Author Contributions**

12  
13  
14 419 Study design (NZ, PJR, NSM, NAA), data analysis (NZ, SW), acquisition and interpretation  
15 420 of the data (NZ, NAA), drafting of the abstract (NZ), revising for content (NZ, SW, PJR, NSM,  
16 421 NAA) and approval of final version before submission (NZ, SW, PJR, NSM, NAA).

17 422

## 18 423 **Data statement**

19  
20  
21 424 Anonymised data are only available upon request from the authors conditional on approval  
22 425 of the appropriate institutional ethics and research governance processes.

23 426

## 24 427 **Acknowledgements**

25  
26  
27 428 We would like to thank David Cable (Electronic Patient Records Implementation and Service  
28 429 Manager) and Florina Borca (Senior Information Analyst R&D) at University Hospital  
29 430 Southampton for support in accessing the data used in this study. We also thank clinical  
30 431 colleagues at the Princess Anne Hospital, Southampton for collecting the data.

31 432

## 32 433 **Funding**

33  
34  
35 434 This work is supported by a University of Southampton Primary Care and Population  
36 435 Sciences PhD studentship (to NZ) , the Academy of Medical Sciences and the Wellcome  
37 436 Trust (Grant no: AMS\_HOP001\1060 to NAA). NAA is also in receipt of research support  
38 437 from the National Institute for Health Research through the NIHR Southampton Biomedical  
39 438 Research Centre.

40 439

## 41 440 **Competing interests**

42 441 The authors have no competing interests to declare.

43 442

## 44 443 **References**

- 45  
46  
47 444 1. Heslehurst N, Rankin J, Wilkinson JR, et al. A nationally representative study of maternal  
48 445 obesity in England, UK: trends in incidence and demographic inequalities in 619 323  
49 446 births, 1989-2007. *Int J Obes (Lond)* 2010;34(3):420-8.  
50 447 2. Poston L. Maternal obesity, gestational weight gain and diet as determinants of offspring  
51 448 long term health. *Best Pract Res Clin Endocrinol Metab* 2012;26(5):627-39.  
52 449 3. Barker DJP. Fetal origins of coronary heart disease. *BMJ* 1995;311:171-74.

1  
2  
3  
4  
5  
6  
7  
8  
9  
10  
11  
12  
13  
14  
15  
16  
17  
18  
19  
20  
21  
22  
23  
24  
25  
26  
27  
28  
29  
30  
31  
32  
33  
34  
35  
36  
37  
38  
39  
40  
41  
42  
43  
44  
45  
46  
47  
48  
49  
50  
51  
52  
53  
54  
55  
56  
57  
58  
59  
60

4. Kramer MS, Morin I, Yang H, et al. Why are babies getting bigger? Temporal trends in fetal growth and its determinants. *J Pediatr* 2002;141(4):538-42.
5. Surkan PJ, Hsieh CC, Johansson AL, et al. Reasons for increasing trends in large for gestational age births. *Obstet Gynecol* 2004;104(4):720-6.
6. Reilly JJ, Armstrong J, Dorosty AR, et al. Early life risk factors for obesity in childhood: cohort study. *BMJ* 2005;330(7504):1357.
7. Danielzik S, Czerwinski-Mast M, Langnase K, et al. Parental overweight, socioeconomic status and high birth weight are the major determinants of overweight and obesity in 5-7 y-old children: baseline data of the Kiel Obesity Prevention Study (KOPS). *Int J Obes Relat Metab Disord* 2004;28(11):1494-502.
8. Curhan GC, Willett WC, Rimm EB, et al. Birth Weight and Adult Hypertension, Diabetes Mellitus, and Obesity in US Men. *Circulation* 1996;94:3246-50.
9. Curhan GC, Chertow GM, Willett WC, et al. Birth Weight and Adult Hypertension and Obesity in Women. *Circulation* 1996;94:1310-15.
10. Phillips DIW, Young JB. Birth weight, climate at birth and the risk of obesity in adult life. *International Journal of Obesity* 2000;24:281-87.
11. Casey BM, Lucas MJ, McIntire DD, et al. Pregnancy Outcomes in Women With Gestational Diabetes Compared With the General Obstetric Population. *Obstetrics & Gynecology* 1997;90(6):869-73.
12. Hunt KJ, Schuller KL. The Increasing Prevalence of Diabetes in Pregnancy. *Obstet Gynecol Clin North Am.* 2007;34(2):173-99.
13. Ignell C, Claesson R, Anderberg E, et al. Trends in the prevalence of gestational diabetes mellitus in southern Sweden, 2003-2012. *Acta Obstet Gynecol Scand* 2014;93(4):420-4.
14. Baptiste-Roberts K, Nicholson WK, Wang NY, et al. Gestational diabetes and subsequent growth patterns of offspring: the National Collaborative Perinatal Project. *Matern Child Health J* 2012;16(1):125-32.
15. Zhu Y, Olsen SF, Mendola P, et al. Growth and obesity through the first 7 y of life in association with levels of maternal glycemia during pregnancy: a prospective cohort study. *Am J Clin Nutr* 2016;103(3):794-800.
16. Marchi J, Berg M, Dencker A, et al. Risks associated with obesity in pregnancy, for the mother and baby: a systematic review of reviews. *Obes Rev* 2015;16(8):621-38.
17. Swamy GK, Edwards S, Gelfand A, et al. Maternal age, birth order, and race: differential effects on birthweight. *J Epidemiol Community Health* 2012;66(2):136-42.
18. Wilcox MA, Chang AMZ, Johnson IR. The effects of parity on birthweight using successive pregnancies. *Acta Obstetrica et Gynecologica Scandinavica* 1996;75(5):459-63.
19. Beaty TH, Skjaerven R, Breazeale DR, et al. Analyzing Sibship Correlations in Birth Weight Using Large Sibships From Norway. *Genetic Epidemiology* 1997;14:423-33.
20. Hinkle SN, Albert PS, Mendola P, et al. The association between parity and birthweight in a longitudinal consecutive pregnancy cohort. *Paediatr Perinat Epidemiol* 2014;28(2):106-15.
21. Getahun D, Ananth CV, Peltier MR, et al. Changes in prepregnancy body mass index between the first and second pregnancies and risk of large-for-gestational-age birth. *Am J Obstet Gynecol* 2007;196(6):530 e1-8.
22. Jain AP, Gavard JA, Rice JJ, et al. The impact of interpregnancy weight change on birthweight in obese women. *Am J Obstet Gynecol* 2013;208(3):205 e1-7.
23. Villamor E, Cnattingius S. Interpregnancy weight change and risk of adverse pregnancy outcomes: a population-based study. *Lancet* 2006;368(9542):1164-70.
24. Wallace JL, Bhattacharya S, Campbell DM, et al. Inter-pregnancy weight change impacts placental weight and is associated with the risk of adverse pregnancy outcomes in the second pregnancy. *BMC Pregnancy and Childbirth* 2014;14(40).
25. McBain RD, Dekker GA, Clifton VL, et al. Impact of inter-pregnancy BMI change on perinatal outcomes: a retrospective cohort study. *Eur J Obstet Gynecol Reprod Biol* 2016;205:98-104.

- 1  
2  
3 505 26. Wallace JM, Bhattacharya S, Campbell DM, et al. Inter-Pregnancy Weight Change and  
4 506 the Risk of Recurrent Pregnancy Complications. *PLoS One* 2016;11(5):e0154812.  
5 507 27. National Institute for Health Care and Excellence. Antenatal care for uncomplicated  
6 508 pregnancies. Manchester, UK, 2008.  
7 509 28. Norris T, Seaton SE, Manktelow BN, et al. Updated birth weight centiles for England  
8 510 and Wales. *Archives of Disease in Childhood. Fetal and Neonatal Edition* 2017.  
9 511 29. National Health Service. *Gestational Diabetes*.  
10 512 <https://www.nhs.uk/conditions/gestational-diabetes/> (accessed 26/11/2018).  
11 513 30. Stata Statistical Software: Release 15 [program]. College Station, TX: StataCorp LLC,  
12 514 2017.  
13 515 31. Cummings P. Methods for estimating adjusted risk ratios. *The Stata Journal*  
14 516 2009;9(2):175-96.  
15 517 32. Linné Y, Dye L, Barkeling B, et al. Long-Term Weight Development in Women: A 15-  
16 518 Year Follow-up of the Effects of Pregnancy. *Obesity Research* 2004;12(7):1166-78.  
17 519 33. Ziauddeen N, Roderick PJ, Macklon NS, et al. Length of inter-pregnancy interval and  
18 520 subsequent preconception adiposity: Findings from a population-based cohort in the  
19 521 South of England. *Revue d'Épidémiologie et de Santé Publique* 2018;66:S374.  
20 522 34. Ziauddeen N, Roderick PJ, Macklon NS, et al. LB5 Is the duration of the preceding inter-  
21 523 pregnancy interval associated with offspring's size at birth? – analysis of a UK  
22 524 population-based cohort. *Journal of Epidemiology and Community Health*  
23 525 2018;72(Suppl 1):A43.  
24 526 35. Fleming TP, Watkins AJ, Velazquez MA, et al. Origins of lifetime health around the time  
25 527 of conception: causes and consequences. *The Lancet* 2018;391(10132):P1842-52.  
26 528 36. Barker M, Dombrowski SU, Colbourn T, et al. Intervention strategies to improve nutrition  
27 529 and health behaviours before conception. *The Lancet* 2018;391(10132):P1853-64.  
28 530 37. Stephenson J, Heslehurst N, Hall H, et al. Before the beginning: nutrition and lifestyle in  
29 531 the preconception period and its importance for future health. *The Lancet*  
30 532 2018;391(10132):P1830-41.  
31 533 38. van der Pligt P, Olander EK, Ball K, et al. Maternal dietary intake and physical activity  
32 534 habits during the postpartum period: associations with clinician advice in a sample of  
33 535 Australian first time mothers. *BMC Pregnancy Childbirth* 2016;16:27.  
34 536 39. van der Pligt P, Willcox J, Hesketh KD, et al. Systematic review of lifestyle interventions  
35 537 to limit postpartum weight retention: implications for future opportunities to prevent  
36 538 maternal overweight and obesity following childbirth. *Obes Rev* 2013;14(10):792-805.  
37 539 40. Huang TT, Yeh CY, Tsai YC. A diet and physical activity intervention for preventing  
38 540 weight retention among Taiwanese childbearing women: a randomised controlled  
39 541 trial. *Midwifery* 2011;27(2):257-64.  
40 542 41. Department for Communities and Local Government. The English Indices of Deprivation  
41 543 2015, 2015.  
42 544 42. Office for National Statistics. Ethnicity and National Identity in England and Wales 201,  
43 545 2012.  
44 546 43. Nohr EA, Vaeth M, Baker JL, et al. Combined associations of prepregnancy body mass  
45 547 index and gestational weight gain with the outcome of pregnancy. *American Journal*  
46 548 *of Clinical Nutrition* 2008;87(6):1750-59.

50 549

51 550 **Figure legends**52 551 Figure 1: The percentage and risk of LGA births in second pregnancy stratified by maternal  
53 552 inter-pregnancy weight change categories54 553 Figure 2: The absolute percentage of LGA births in second pregnancy by inter-pregnancy  
55 554 change in maternal body mass (BMI) stratified by maternal BMI category in the first  
56 555 pregnancy and previous outcome of LGA  
57  
58  
59  
60

1  
2  
3  
4  
5  
6  
7  
8  
9  
10  
11  
12  
13  
14  
15  
16  
17  
18  
19  
20  
21  
22  
23  
24  
25  
26  
27  
28  
29  
30  
31  
32  
33  
34  
35  
36  
37  
38  
39  
40  
41  
42  
43  
44  
45  
46  
47  
48  
49  
50  
51  
52  
53  
54  
55  
56  
57  
58  
59  
60

556

557

558

559 **Table legends:**

560 Table 1: Maternal and birth characteristics in the second live birth pregnancy categorised by  
561 maternal weight change from the first livebirth pregnancy for the period of January 2003 -  
562 September 2017, University Hospital Southampton NHS Foundation Trust, Hampshire,  
563 England

564 Table 2: Associations between risk of recurrent large-for-gestational age (LGA) birth in the  
565 second pregnancy and change in maternal body mass index (BMI) between pregnancies as  
566 measured at the first antenatal visit of each pregnancy stratified by BMI category in the first  
567 pregnancy

568 Table 3: Associations between the risk of 'new' large-for-gestational age (LGA) birth in the  
569 second pregnancy following a non-LGA birth in the first pregnancy and change in maternal  
570 body mass index (BMI) between pregnancies measured at the first antenatal visit of each  
571 pregnancy stratified by BMI category in the first pregnancy

Peer review only



Table 1: Maternal and birth characteristics in the second live birth pregnancy categorised by maternal weight change gain from the first live birth pregnancy for the period of January 2003 - September 2017, University Hospital Southampton NHS Foundation Trust, Hampshire, England

|                                                            | Lost $\leq -1$ kg/m <sup>2</sup> from previous pregnancy | Weight stable ( $>-1$ to $<1$ kg/m <sup>2</sup> ) | Gained 1-3 kg/m <sup>2</sup> from previous pregnancy | Gained $\geq 3$ kg/m <sup>2</sup> from previous pregnancy | p*     |
|------------------------------------------------------------|----------------------------------------------------------|---------------------------------------------------|------------------------------------------------------|-----------------------------------------------------------|--------|
| N                                                          | 2548                                                     | 5785                                              | 4446                                                 | 3161                                                      |        |
| Maternal age, years (mean $\pm$ SD)                        | 28.7 $\pm$ 5.4                                           | 29.8 $\pm$ 5.3                                    | 29.2 $\pm$ 5.4                                       | 27.3 $\pm$ 5.5                                            | <0.001 |
| Timing of first booking appointment, weeks (mean $\pm$ SD) | 10.8 $\pm$ 2.3                                           | 11.0 $\pm$ 2.3                                    | 11.1 $\pm$ 2.4                                       | 11.0 $\pm$ 2.6                                            | <0.001 |
| Maternal BMI at booking, kg/m <sup>2</sup> (mean $\pm$ SD) | 24.1 $\pm$ 5.1                                           | 23.8 $\pm$ 4.4                                    | 25.9 $\pm$ 4.7                                       | 30.8 $\pm$ 5.9                                            | <0.001 |
| Maternal BMI at booking in first pregnancy (%; 95% CI)     |                                                          |                                                   |                                                      |                                                           | <0.001 |
| Underweight ( $< 18.5$ )                                   | 0.8 (0.5 to 1.2)                                         | 4.3 (3.8 to 4.8)                                  | 5.3 (4.7 to 6.0)                                     | 3.7 (3.1 to 4.4)                                          |        |
| Normal weight (18.5 to 24.9)                               | 47.6 (45.6 to 49.5)                                      | 67.4 (66.2 to 68.6)                               | 62.5 (61.0 to 63.9)                                  | 49.0 (47.2 to 50.7)                                       |        |
| Overweight (25.0 to 29.9)                                  | 30.1 (28.3 to 31.9)                                      | 19.4 (18.4 to 20.5)                               | 22.0 (20.8 to 23.3)                                  | 29.5 (28.0 to 31.2)                                       |        |
| Obese ( $\geq 30.0$ )                                      | 21.5 (19.9 to 23.2)                                      | 8.9 (8.2 to 9.7)                                  | 10.2 (9.3 to 11.1)                                   | 17.8 (16.5 to 19.2)                                       |        |
| Maternal BMI at booking in second pregnancy (%; 95% CI)    |                                                          |                                                   |                                                      |                                                           | <0.001 |
| Underweight ( $< 18.5$ )                                   | 6.9 (5.9 to 7.9)                                         | 4.3 (3.8 to 4.8)                                  | 0.6 (0.4 to 0.9)                                     | 0.0 (0.0 to 0.2)                                          |        |
| Normal weight (18.5 to 24.9)                               | 61.1 (59.2 to 63.0)                                      | 66.8 (65.6 to 68.1)                               | 50.7 (49.2 to 52.1)                                  | 14.9 (13.7 to 16.2)                                       |        |
| Overweight (25.0 to 29.9)                                  | 20.1 (18.6 to 21.7)                                      | 19.7 (18.7 to 20.7)                               | 32.6 (31.2 to 34.0)                                  | 36.7 (35.0 to 38.4)                                       |        |
| Obese ( $\geq 30.0$ )                                      | 11.9 (10.7 to 13.3)                                      | 9.2 (8.5 to 10.0)                                 | 16.1 (15.0 to 17.2)                                  | 48.3 (46.6 to 50.1)                                       |        |
| Maternal smoking status at booking (%; 95% CI)             |                                                          |                                                   |                                                      |                                                           | <0.001 |
| Never smoked/quit                                          | 57.2 (55.3 to 59.2)                                      | 63.0 (61.8 to 64.3)                               | 60.5 (59.0 to 62.0)                                  | 50.7 (48.9 to 52.4)                                       |        |
| Stopped $>1$ year before conceiving                        | 16.1 (14.6 to 17.5)                                      | 17.2 (16.3 to 18.2)                               | 17.7 (16.5 to 18.8)                                  | 14.9 (13.7 to 16.2)                                       |        |
| Stopped $<1$ year prior to conceiving                      | 4.0 (3.3 to 4.8)                                         | 2.8 (2.4 to 3.2)                                  | 3.5 (3.0 to 4.1)                                     | 4.9 (4.2 to 5.7)                                          |        |
| Stopped when pregnancy confirmed                           | 6.8 (5.8 to 7.8)                                         | 5.9 (5.3 to 6.6)                                  | 6.9 (6.2 to 7.7)                                     | 10.3 (9.3 to 11.4)                                        |        |
| Continued smoking                                          | 15.9 (14.5 to 17.4)                                      | 11.0 (10.2 to 11.8)                               | 11.4 (10.5 to 12.4)                                  | 19.1 (17.8 to 20.6)                                       |        |
| Maternal education (%; 95% CI)                             |                                                          |                                                   |                                                      |                                                           | <0.001 |
| Secondary (GCSE) or under                                  | 30.7 (28.9 to 32.5)                                      | 24.0 (22.9 to 25.2)                               | 29.4 (28.1 to 30.8)                                  | 36.3 (34.6 to 38.0)                                       |        |
| College (A levels)                                         | 40.4 (38.5 to 42.3)                                      | 38.8 (37.6 to 40.1)                               | 39.5 (38.1 to 41.0)                                  | 45.8 (44.0 to 47.5)                                       |        |

|                                          |                     |                     |                     |                     |        |
|------------------------------------------|---------------------|---------------------|---------------------|---------------------|--------|
| University degree or above               | 28.9 (27.2 to 30.7) | 37.1 (35.9 to 38.4) | 31.1 (29.7 to 32.5) | 17.9 (16.6 to 19.3) |        |
| Maternal employment (% , 95% CI)         |                     |                     |                     |                     |        |
| Employed                                 | 66.2 (64.3 to 68.0) | 71.7 (70.5 to 72.9) | 67.2 (65.8 to 68.5) | 56.5 (54.8 to 58.2) | <0.001 |
| Unemployed                               | 31.8 (30.0 to 33.7) | 26.9 (25.8 to 28.1) | 31.1 (29.7 to 32.5) | 41.6 (39.8 to 43.3) |        |
| In education                             | 0.9 (0.6 to 1.4)    | 0.8 (0.6 to 1.1)    | 1.1 (0.8 to 1.4)    | 1.3 (0.9 to 1.8)    |        |
| Not specified                            | 1.0 (0.7 to 1.5)    | 0.6 (0.4 to 0.8)    | 0.7 (0.5 to 1.0)    | 0.6 (0.4 to 1.0)    |        |
| Ethnicity (% , 95% CI)                   |                     |                     |                     |                     |        |
| White                                    | 89.9 (88.7 to 91.1) | 88.0 (87.1 to 88.8) | 85.1 (84.0 to 86.1) | 84.8 (83.5 to 86.1) | <0.001 |
| Mixed                                    | 0.8 (0.5 to 1.3)    | 0.9 (0.7 to 1.2)    | 1.4 (1.1 to 1.8)    | 1.6 (1.1 to 2.0)    |        |
| Asian                                    | 4.8 (4.0 to 5.7)    | 5.6 (5.0 to 6.0)    | 7.2 (6.5 to 8.0)    | 7.7 (6.8 to 8.7)    |        |
| Black/African/Caribbean                  | 0.6 (0.4 to 1.0)    | 1.0 (0.8 to 1.3)    | 1.6 (1.3 to 2.1)    | 2.4 (1.9 to 3.0)    |        |
| Other                                    | 0.7 (0.4 to 1.1)    | 1.0 (0.8 to 1.3)    | 1.0 (0.8 to 1.4)    | 1.3 (0.9 to 1.7)    |        |
| Not specified                            | 3.1 (2.5 to 3.9)    | 3.5 (3.0 to 4.0)    | 3.6 (3.1 to 4.2)    | 2.2 (1.8 to 2.8)    |        |
| Inter-pregnancy interval (median, IQR)   | 21.7 (14.4 to 32.7) | 21.6 (14.1 to 32.0) | 23.7 (14.4 to 35.6) | 27.7 (16.0 to 45.6) | <0.001 |
| Inter-pregnancy interval (% , 95% CI)    |                     |                     |                     |                     |        |
| 0-11 months                              | 17.4 (15.9 to 18.9) | 17.6 (16.6 to 18.6) | 18.1 (17.0 to 19.3) | 16.6 (15.4 to 17.9) | <0.001 |
| 12-23 months                             | 39.8 (37.8 to 41.7) | 39.9 (38.6 to 41.1) | 33.1 (31.7 to 34.5) | 26.3 (24.8 to 27.9) |        |
| 24-35 months                             | 22.6 (21.0 to 24.2) | 23.6 (22.5 to 24.7) | 24.4 (23.2 to 25.7) | 20.5 (19.1 to 21.9) |        |
| 36 months or more                        | 20.3 (18.7 to 21.9) | 18.9 (17.9 to 20.0) | 24.3 (23.1 to 25.6) | 36.5 (34.9 to 38.2) |        |
| Birthweight, grams (mean ± SD)           | 3463 ± 563          | 3467 ± 523          | 3507 ± 536          | 3531 ± 558          |        |
| Previous size at birth (first pregnancy) |                     |                     |                     |                     |        |
| Small-for-gestational age                | 13.1 (11.8 to 14.4) | 12.6 (11.8 to 13.5) | 11.7 (10.8 to 12.7) | 12.4 (11.3 to 13.6) | 0.11   |
| Appropriate-for-gestational age          | 79.6 (77.9 to 81.1) | 81.1 (80.0 to 82.1) | 81.2 (80.1 to 82.4) | 79.9 (78.4 to 81.3) |        |
| Large-for-gestational age                | 7.4 (6.4 to 8.5)    | 6.3 (5.7 to 7.0)    | 7.1 (6.3 to 7.8)    | 7.7 (6.8 to 8.7)    |        |
| Size at birth (second pregnancy)         |                     |                     |                     |                     |        |
| Small-for-gestational age                | 8.7 (7.6 to 9.8)    | 7.0 (6.4 to 7.7)    | 6.2 (5.5 to 6.9)    | 6.7 (5.9 to 7.6)    | <0.001 |
| Appropriate-for-gestational age          | 79.0 (77.3 to 80.5) | 81.1 (80.0 to 82.1) | 80.3 (79.1 to 81.5) | 77.4 (75.9 to 78.9) |        |
| Large-for-gestational age                | 12.4 (11.1 to 13.7) | 11.9 (11.1 to 12.8) | 13.5 (12.5 to 14.5) | 15.9 (14.6 to 17.2) |        |

\*p values calculated using ANOVA for continuous and chi square test for categorical variables

Table 2: Associations between risk of recurrent large-for-gestational age (LGA) birth in the second pregnancy and change in maternal body mass index (BMI) between pregnancies as measured at the first antenatal visit of each pregnancy stratified by BMI category in the first pregnancy

| Maternal BMI change (categorised)                         |            | Full sample |                      |              | Normal weight at first pregnancy |      |              | Overweight at first pregnancy |             |                     | Obese at first pregnancy |      |              |
|-----------------------------------------------------------|------------|-------------|----------------------|--------------|----------------------------------|------|--------------|-------------------------------|-------------|---------------------|--------------------------|------|--------------|
|                                                           |            | n           | Relative risk, (RR)* | 95% CI       | n                                | RR*  | 95% CI       | n                             | RR*         | 95% CI              | n                        | RR*  | 95% CI       |
| Lost $\leq$ -1 kg/m <sup>2</sup> from previous pregnancy  | Unadjusted | 1109        | 0.89                 | 0.74 to 1.08 | 521                              | 0.80 | 0.54 to 1.20 | 338                           | <b>0.68</b> | <b>0.50 to 0.94</b> | 236                      | 1.16 | 0.79 to 1.69 |
|                                                           | Adjusted** | 1066        | 0.88                 | 0.72 to 1.07 | 500                              | 0.79 | 0.54 to 1.17 | 324                           | <b>0.69</b> | <b>0.48 to 0.97</b> | 229                      | 1.21 | 0.79 to 1.83 |
|                                                           |            |             | Ref                  |              |                                  | Ref  |              |                               | Ref         |                     |                          | Ref  |              |
| Weight stable (>-1 to <1 kg/m <sup>2</sup> )              |            |             |                      |              |                                  |      |              |                               |             |                     |                          |      |              |
| Gained 1-3 kg/m <sup>2</sup> from previous pregnancy      | Unadjusted |             | 0.97                 | 0.83 to 1.13 |                                  | 0.97 | 0.78 to 1.21 |                               | 0.81        | 0.62 to 1.06        |                          | 1.25 | 0.85 to 1.83 |
|                                                           | Adjusted** |             | 0.98                 | 0.84 to 1.15 |                                  | 1.02 | 0.83 to 1.27 |                               | 0.81        | 0.61 to 1.08        |                          | 1.28 | 0.86 to 1.91 |
| Gained $\geq$ 3 kg/m <sup>2</sup> from previous pregnancy | Unadjusted |             | 0.96                 | 0.81 to 1.14 |                                  | 0.89 | 0.68 to 1.17 |                               | 0.87        | 0.66 to 1.14        |                          | 1.16 | 0.79 to 1.71 |
|                                                           | Adjusted** |             | 1.00                 | 0.83 to 1.20 |                                  | 0.91 | 0.68 to 1.21 |                               | 0.91        | 0.67 to 1.25        |                          | 1.28 | 0.84 to 1.94 |

\*Generalised linear model with log link and robust variance estimator used to derive RR

\*\*Adjusted for: maternal age, ethnicity, highest educational qualification, whether undergone infertility treatment, smoking status, employment status, baseline BMI, gestational diabetes in current pregnancy and inter-pregnancy interval



Table 3: Associations between the risk of 'new' large-for-gestational age (LGA) birth in the second pregnancy following a non-LGA birth in the first pregnancy and change in maternal body mass index (BMI) between pregnancies measured at the first antenatal visit of each pregnancy stratified by BMI category in the first pregnancy

| Maternal BMI change (categorised)                    |            | Full sample |                      |                     | Underweight at first pregnancy |             |                     | Normal weight at first pregnancy |             |                     | Overweight at first pregnancy |             |                     | Obese at first pregnancy |      |              |
|------------------------------------------------------|------------|-------------|----------------------|---------------------|--------------------------------|-------------|---------------------|----------------------------------|-------------|---------------------|-------------------------------|-------------|---------------------|--------------------------|------|--------------|
|                                                      |            | n           | Relative risk, (RR)* | 95% CI              | n                              | RR*         | 95% CI              | n                                | RR*         | 95% CI              | n                             | RR*         | 95% CI              | n                        | RR*  | 95% CI       |
| Lost ≤ -1 kg/m <sup>2</sup> from previous pregnancy  | Unadjusted | 14788       | 1.05                 | 0.91 to 1.22        | 606                            | -           | -                   | 8888                             | 0.88        | 0.68 to 1.14        | 3458                          | 0.95        | 0.73 to 1.24        | 1836                     | 0.90 | 0.67 to 1.23 |
|                                                      | Adjusted** | 14215       | 0.94                 | 0.80 to 1.10        |                                | -           | -                   | 8513                             | 0.87        | 0.68 to 1.12        | 3326                          | 0.96        | 0.72 to 1.29        |                          | 0.95 | 0.67 to 1.34 |
| Weight stable (>-1 to <1 kg/m <sup>2</sup> )         |            |             | Ref                  |                     |                                | Ref         |                     | Ref                              |             |                     | Ref                           |             |                     | Ref                      |      |              |
| Gained 1-3 kg/m <sup>2</sup> from previous pregnancy | Unadjusted |             | <b>1.16</b>          | <b>1.03 to 1.31</b> |                                | 1.21        | 0.45 to 3.29        |                                  | <b>1.20</b> | <b>1.02 to 1.40</b> |                               | 1.19        | 0.94 to 1.50        |                          | 0.89 | 0.65 to 1.23 |
|                                                      | Adjusted** |             | 1.13                 | 0.99 to 1.28        |                                | 1.04        | 0.36 to 3.04        |                                  | <b>1.26</b> | <b>1.06 to 1.50</b> |                               | 1.16        | 0.89 to 1.50        |                          | 0.86 | 0.61 to 1.22 |
| Gained ≥3 kg/m <sup>2</sup> from previous pregnancy  | Unadjusted |             | <b>1.40</b>          | <b>1.24 to 1.59</b> |                                | <b>2.83</b> | <b>1.08 to 7.40</b> |                                  | <b>1.37</b> | <b>1.14 to 1.64</b> |                               | 1.22        | 0.96 to 1.53        |                          | 1.10 | 0.82 to 1.46 |
|                                                      | Adjusted** |             | <b>1.34</b>          | <b>1.17 to 1.54</b> |                                | 2.08        | 0.67 to 6.51        |                                  | <b>1.34</b> | <b>1.09 to 1.65</b> |                               | <b>1.35</b> | <b>1.05 to 1.75</b> |                          | 1.21 | 0.89 to 1.65 |

\*Generalised linear model with log link and robust variance estimator used to derive RR

\*\*Adjusted for: maternal age, ethnicity, highest educational qualification, whether undergone infertility treatment, smoking status, employment status, baseline BMI, gestational diabetes in current pregnancy and inter-pregnancy interval

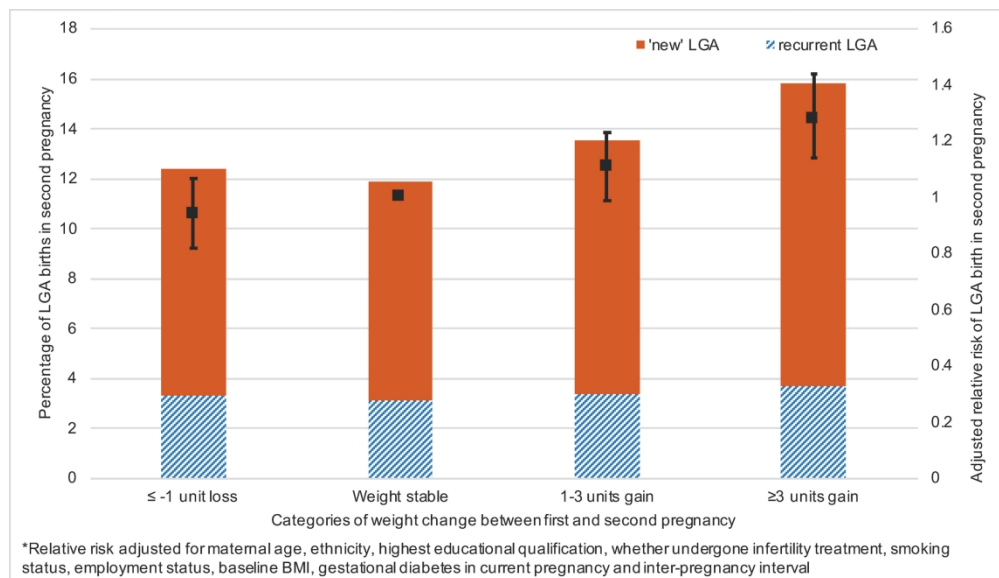

Figure 1: The percentage and risk of LGA births in second pregnancy stratified by maternal inter-pregnancy weight change categories

222x128mm (300 x 300 DPI)

1  
2  
3  
4  
5  
6  
7  
8  
9  
10  
11  
12  
13  
14  
15  
16  
17  
18  
19  
20  
21  
22  
23  
24  
25  
26  
27  
28  
29  
30  
31  
32  
33  
34  
35  
36  
37  
38  
39  
40  
41  
42  
43  
44  
45  
46  
47  
48  
49  
50  
51  
52  
53  
54  
55  
56  
57  
58  
59  
60

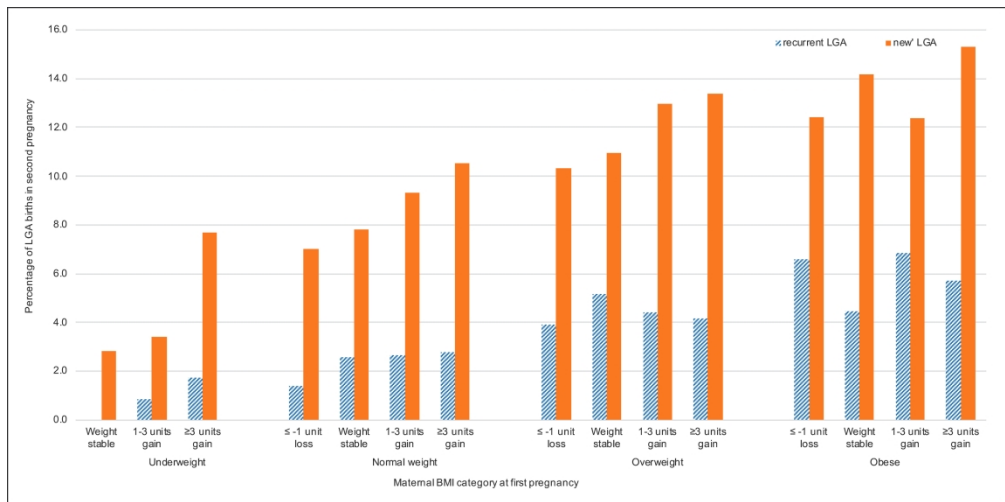

Figure 2: The absolute percentage of LGA births in second pregnancy by inter-pregnancy change in maternal body mass (BMI) stratified by maternal BMI category in the first pregnancy and previous outcome of LGA

346x171mm (300 x 300 DPI)

# Reporting checklist for cohort study.

Based on the STROBE cohort guidelines.

## Instructions to authors

Complete this checklist by entering the page numbers from your manuscript where readers will find each of the items listed below.

Your article may not currently address all the items on the checklist. Please modify your text to include the missing information. If you are certain that an item does not apply, please write "n/a" and provide a short explanation.

Upload your completed checklist as an extra file when you submit to a journal.

In your methods section, say that you used the STROBE cohort reporting guidelines, and cite them as:

von Elm E, Altman DG, Egger M, Pocock SJ, Gøtzsche PC, Vandenbroucke JP. The Strengthening the Reporting of Observational Studies in Epidemiology (STROBE) Statement: guidelines for reporting observational studies.

|                        |     | Reporting Item                                                                                                                  | Page Number |
|------------------------|-----|---------------------------------------------------------------------------------------------------------------------------------|-------------|
| Title                  | #1a | Indicate the study's design with a commonly used term in the title or the abstract                                              | 1 and 2     |
| Abstract               | #1b | Provide in the abstract an informative and balanced summary of what was done and what was found                                 | 2           |
| Background / rationale | #2  | Explain the scientific background and rationale for the investigation being reported                                            | 3-4         |
| Objectives             | #3  | State specific objectives, including any prespecified hypotheses                                                                | 4           |
| Study design           | #4  | Present key elements of study design early in the paper                                                                         | 4           |
| Setting                | #5  | Describe the setting, locations, and relevant dates, including periods of recruitment, exposure, follow-up, and data collection | 4           |
| Eligibility criteria   | #6a | Give the eligibility criteria, and the sources and methods of selection of participants. Describe methods of follow-up.         | 4           |

|    |                  |      |                                                                   |     |
|----|------------------|------|-------------------------------------------------------------------|-----|
| 1  |                  | #6b  | For matched studies, give matching criteria and number of         | n/a |
| 2  |                  |      | exposed and unexposed                                             |     |
| 3  |                  |      |                                                                   |     |
| 4  |                  |      |                                                                   |     |
| 5  | Variables        | #7   | Clearly define all outcomes, exposures, predictors, potential     | 4-5 |
| 6  |                  |      | confounders, and effect modifiers. Give diagnostic criteria, if   |     |
| 7  |                  |      | applicable                                                        |     |
| 8  |                  |      |                                                                   |     |
| 9  |                  |      |                                                                   |     |
| 10 | Data sources /   | #8   | For each variable of interest give sources of data and details of | 4-5 |
| 11 | measurement      |      | methods of assessment (measurement). Describe                     |     |
| 12 |                  |      | comparability of assessment methods if there is more than one     |     |
| 13 |                  |      | group. Give information separately for for exposed and            |     |
| 14 |                  |      | unexposed groups if applicable.                                   |     |
| 15 |                  |      |                                                                   |     |
| 16 |                  |      |                                                                   |     |
| 17 |                  |      |                                                                   |     |
| 18 | Bias             | #9   | Describe any efforts to address potential sources of bias         | n/a |
| 19 |                  |      |                                                                   |     |
| 20 |                  |      |                                                                   |     |
| 21 | Study size       | #10  | Explain how the study size was arrived at                         | 4   |
| 22 |                  |      |                                                                   |     |
| 23 | Quantitative     | #11  | Explain how quantitative variables were handled in the            | 4-5 |
| 24 | variables        |      | analyses. If applicable, describe which groupings were chosen,    |     |
| 25 |                  |      | and why                                                           |     |
| 26 |                  |      |                                                                   |     |
| 27 |                  |      |                                                                   |     |
| 28 | Statistical      | #12a | Describe all statistical methods, including those used to control | 5   |
| 29 | methods          |      | for confounding                                                   |     |
| 30 |                  |      |                                                                   |     |
| 31 |                  |      |                                                                   |     |
| 32 |                  | #12b | Describe any methods used to examine subgroups and                | 5   |
| 33 |                  |      | interactions                                                      |     |
| 34 |                  |      |                                                                   |     |
| 35 |                  |      |                                                                   |     |
| 36 |                  | #12c | Explain how missing data were addressed                           | n/a |
| 37 |                  |      |                                                                   |     |
| 38 |                  | #12d | If applicable, explain how loss to follow-up was addressed        | n/a |
| 39 |                  |      |                                                                   |     |
| 40 |                  |      |                                                                   |     |
| 41 |                  | #12e | Describe any sensitivity analyses                                 | n/a |
| 42 |                  |      |                                                                   |     |
| 43 | Participants     | #13a | Report numbers of individuals at each stage of study—eg           | 5   |
| 44 |                  |      | numbers potentially eligible, examined for eligibility, confirmed |     |
| 45 |                  |      | eligible, included in the study, completing follow-up, and        |     |
| 46 |                  |      | analysed. Give information separately for for exposed and         |     |
| 47 |                  |      | unexposed groups if applicable.                                   |     |
| 48 |                  |      |                                                                   |     |
| 49 |                  |      |                                                                   |     |
| 50 |                  |      |                                                                   |     |
| 51 |                  | #13b | Give reasons for non-participation at each stage                  | n/a |
| 52 |                  |      |                                                                   |     |
| 53 |                  | #13c | Consider use of a flow diagram                                    | n/a |
| 54 |                  |      |                                                                   |     |
| 55 |                  |      |                                                                   |     |
| 56 | Descriptive data | #14a | Give characteristics of study participants (eg demographic,       | 5-6 |
| 57 |                  |      | clinical, social) and information on exposures and potential      |     |
| 58 |                  |      |                                                                   |     |
| 59 |                  |      |                                                                   |     |
| 60 |                  |      |                                                                   |     |

|                  |      |                                                                                                                                                                                                          |            |
|------------------|------|----------------------------------------------------------------------------------------------------------------------------------------------------------------------------------------------------------|------------|
|                  |      | confounders. Give information separately for exposed and unexposed groups if applicable.                                                                                                                 |            |
|                  | #14b | Indicate number of participants with missing data for each variable of interest                                                                                                                          | 13-14      |
|                  | #14c | Summarise follow-up time (eg, average and total amount)                                                                                                                                                  | n/a        |
| Outcome data     | #15  | Report numbers of outcome events or summary measures over time. Give information separately for exposed and unexposed groups if applicable.                                                              | 5-6, 13-14 |
| Main results     | #16a | Give unadjusted estimates and, if applicable, confounder-adjusted estimates and their precision (eg, 95% confidence interval). Make clear which confounders were adjusted for and why they were included | 6-7, 15-21 |
|                  | #16b | Report category boundaries when continuous variables were categorized                                                                                                                                    | 4-5, 13-14 |
|                  | #16c | If relevant, consider translating estimates of relative risk into absolute risk for a meaningful time period                                                                                             | n/a        |
| Other analyses   | #17  | Report other analyses done—e.g., analyses of subgroups and interactions, and sensitivity analyses                                                                                                        | n/a        |
| Key results      | #18  | Summarise key results with reference to study objectives                                                                                                                                                 | 7          |
| Limitations      | #19  | Discuss limitations of the study, taking into account sources of potential bias or imprecision. Discuss both direction and magnitude of any potential bias.                                              | 8-9        |
| Interpretation   | #20  | Give a cautious overall interpretation considering objectives, limitations, multiplicity of analyses, results from similar studies, and other relevant evidence.                                         | 9          |
| Generalisability | #21  | Discuss the generalisability (external validity) of the study results                                                                                                                                    | 8-9        |
| Funding          | #22  | Give the source of funding and the role of the funders for the present study and, if applicable, for the original study on which the present article is based                                            | 10         |

The STROBE checklist is distributed under the terms of the Creative Commons Attribution License CC-BY. This checklist was completed on 22. August 2018 using <http://www.goodreports.org/>, a tool made by the [EQUATOR Network](#) in collaboration with [Penelope.ai](#)

# BMJ Open

## Is maternal weight gain between pregnancies associated with risk of large-for-gestational age birth? Analysis of a UK population-based cohort

|                                 |                                                                                                                                                                                                                                                                                                                                                                                                                                                                                                                                                                                                                                                                                                                                                   |
|---------------------------------|---------------------------------------------------------------------------------------------------------------------------------------------------------------------------------------------------------------------------------------------------------------------------------------------------------------------------------------------------------------------------------------------------------------------------------------------------------------------------------------------------------------------------------------------------------------------------------------------------------------------------------------------------------------------------------------------------------------------------------------------------|
| Journal:                        | <i>BMJ Open</i>                                                                                                                                                                                                                                                                                                                                                                                                                                                                                                                                                                                                                                                                                                                                   |
| Manuscript ID                   | bmjopen-2018-026220.R2                                                                                                                                                                                                                                                                                                                                                                                                                                                                                                                                                                                                                                                                                                                            |
| Article Type:                   | Research                                                                                                                                                                                                                                                                                                                                                                                                                                                                                                                                                                                                                                                                                                                                          |
| Date Submitted by the Author:   | 22-Feb-2019                                                                                                                                                                                                                                                                                                                                                                                                                                                                                                                                                                                                                                                                                                                                       |
| Complete List of Authors:       | Ziauddeen, Nida; University of Southampton, School of Primary Care and Population Sciences, Faculty of Medicine<br>Wilding, Sam; University of Southampton, School of Primary Care and Population Sciences, Faculty of Medicine<br>Roderick, Paul; University of Southampton, School of Primary Care and Population Sciences, Faculty of Medicine<br>Macklon, Nicholas; University of Copenhagen, Zealand University Hospital, Department of Obstetrics and Gynaecology; London Women's Clinic<br>Alwan, Nisreen; University of Southampton, School of Primary Care and Population Sciences, Faculty of Medicine; University of Southampton and University Hospital Southampton NHS Foundation Trust, NIHR Southampton Biomedical Research Centre |
| <b>Primary Subject Heading</b>: | Epidemiology                                                                                                                                                                                                                                                                                                                                                                                                                                                                                                                                                                                                                                                                                                                                      |
| Secondary Subject Heading:      | Epidemiology, Public health                                                                                                                                                                                                                                                                                                                                                                                                                                                                                                                                                                                                                                                                                                                       |
| Keywords:                       | obesity, pregnancy, pregnancy outcome, weight gain, large-for-gestational age                                                                                                                                                                                                                                                                                                                                                                                                                                                                                                                                                                                                                                                                     |
|                                 |                                                                                                                                                                                                                                                                                                                                                                                                                                                                                                                                                                                                                                                                                                                                                   |

SCHOLARONE™  
Manuscripts

1  
2  
3 1 **Is maternal weight gain between pregnancies associated with risk of large-for-**  
4 2 **gestational age birth? Analysis of a UK population-based cohort**  
5  
6 3

7 4 Nida Ziauddeen<sup>1</sup>, Sam Wilding<sup>1</sup>, Paul J. Roderick<sup>1</sup>, Nicholas S. Macklon<sup>2,3</sup>, Nisreen A.  
8 5 Alwan<sup>1,4</sup>  
9  
10 6

11 7 <sup>1</sup> School of Primary Care and Population Sciences, Faculty of Medicine, University of  
12 8 Southampton, Southampton, UK

13 9 <sup>2</sup> Department of Obstetrics and Gynaecology, University of Copenhagen, Zealand University  
14 10 Hospital, Roskilde 4000, Denmark

15 11 <sup>3</sup> London Women's Clinic, 113-115 Harley Street, London W1G 6AP

16 12 <sup>4</sup> NIHR Southampton Biomedical Research Centre, University of Southampton and  
17 13 University Hospital Southampton NHS Foundation Trust, Southampton SO16 6YD, UK  
18  
19  
20  
21  
22  
23  
24  
25  
26  
27  
28  
29  
30  
31  
32  
33  
34  
35  
36  
37  
38  
39  
40  
41  
42  
43  
44  
45  
46  
47  
48  
49  
50  
51  
52  
53  
54  
55  
56  
57  
58  
59  
60

16 Author emails: N.Ziauddeen@soton.ac.uk, S.A.Wilding@soton.ac.uk, pjr@soton.ac.uk,  
17 nism@regionsjaelland.dk, N.A.Alwan@soton.ac.uk

20 Corresponding author: Nida Ziauddeen

21 Academic Unit of Primary Care and Population Sciences, Faculty of Medicine, Mailpoint 805,  
22 Level C (AC22), South Academic Block, Southampton General Hospital, Tremona Road,  
23 Southampton SO16 6YD, UK

24 Email: N.Ziauddeen@soton.ac.uk

25 Telephone number: 023 81 206287

28 **Keywords:** obesity, pregnancy, pregnancy outcome, weight gain, birth weight

29 **Word count:** 4287 words



## 34 Abstract

35 **Objective:** Maternal overweight and obesity during pregnancy increases the risk of large-for-  
36 gestational age (LGA) birth and childhood obesity. We aimed to investigate the association  
37 between maternal weight change between subsequent pregnancies and risk of having a  
38 LGA birth.

39 **Design:** Population-based cohort.

40 **Setting:** Routinely collected antenatal healthcare data between January 2003 and  
41 September 2017 at University Hospital Southampton, England.

42 **Participants:** Health records of women with their first two consecutive singleton live-birth  
43 pregnancies were analysed (n=15940).

44 **Primary outcome measure:** Risk of LGA, recurrent LGA and 'new' LGA births in the  
45 second pregnancy.

46 **Results:** Of the 15940 women, 16.0% lost and 47.7% gained weight ( $\geq 1$  kg/m<sup>2</sup>) between  
47 pregnancies. A lower proportion of babies born to women who lost  $\geq 1$  kg/m<sup>2</sup> (12.4%) and  
48 remained weight stable between -1 to 1 kg/m<sup>2</sup> (11.9%) between pregnancies were LGA  
49 compared to 13.5% and 15.9% in women who gained 1-3 and  $\geq 3$  kg/m<sup>2</sup> respectively. The  
50 highest proportion was in obese women who gained  $\geq 3$  kg/m<sup>2</sup> (21.2%). Overweight women  
51 had a reduced risk of recurrent LGA in the second pregnancy if they lost  $\geq 1$  kg/m<sup>2</sup> (adjusted  
52 relative risk (aRR) 0.69, 95% CI 0.48-0.97) whereas overweight women who gained  $\geq 3$   
53 kg/m<sup>2</sup> were at increased risk of 'new' LGA after having a non-LGA birth in their first  
54 pregnancy (aRR 1.35, 95% CI 1.05-1.75). Normal-weight women who gained weight were  
55 also at increased risk of 'new' LGA in the second pregnancy (aRR 1.26, 95% CI 1.06-1.50  
56 with gain of 1-3 kg/m<sup>2</sup> and aRR 1.34, 95% CI 1.09-1.65 with gain of  $\geq 3$  kg/m<sup>2</sup>).

57 **Conclusions:** Losing weight after an LGA birth was associated with a reduced LGA risk in  
58 the next pregnancy in overweight women, while inter-pregnancy weight gain was associated  
59 with an increased 'new' LGA risk. Preventing weight gain between pregnancies is an  
60 important prevention measure to achieve better maternal and offspring outcomes.

61

62

## 63 Article summary

### 64 Strengths and limitations of this study

- 65 • Utilises antenatal care and birth data from a large population-based cohort including  
66 women from all socioeconomic backgrounds
- 67 • Objective measurement of both exposure (maternal weight) and outcome in two  
68 pregnancies per woman
- 69 • Self-reported data for covariates
- 70 • Lack of information on breastfeeding duration and maternal weight gain during  
71 pregnancy

72

73

74

75

## 76 Introduction

77 The prevalence of maternal obesity has been rising over time. It has more than doubled in  
78 England between 1989 and 2007 (7.6% to 15.6%), with the proportion of normal weight  
79 pregnancies showing a 12% decrease from 65.6% to 53.6%<sup>1</sup>. Maternal overweight and  
80 obesity is a key risk factor for adverse maternal and birth outcomes. It also increases the risk  
81 of long-term health problems in the child including obesity, cardiovascular disease, diabetes  
82 and cognitive and behavioural disorders<sup>2</sup>. Birthweight is a key early life predictor of long-term  
83 health outcomes such as obesity and cardiovascular disease<sup>3</sup> and potentially acts as a  
84 mediator on the causal pathway between maternal obesity and long-term offspring  
85 outcomes. The incidence of large-for-gestational age (LGA) birth, defined as >90th  
86 percentile weight for gestational age, has increased over time in high-income countries<sup>4,5</sup>.  
87 LGA is associated with both childhood<sup>6,7</sup> and adult obesity<sup>8-10</sup>. A key risk factor for LGA birth  
88 is gestational diabetes (GDM)<sup>11</sup>, the incidence of which has also increased over time<sup>12,13</sup>.  
89 Offspring of mothers with gestational diabetes have increased risk of childhood overweight  
90 and obesity<sup>14,15</sup>. Maternal obesity is an established risk factor for both GDM and LGA birth<sup>16</sup>.  
91 Change in maternal body mass index (BMI) between pregnancies could modify the risk of  
92 LGA birth in the subsequent pregnancy.

93 Birthweight, on average, increases with parity. First-born infants tend to have the lowest  
94 birthweight among their younger siblings<sup>17-19</sup> up to the fourth pregnancy<sup>20</sup>. However,  
95 birthweight was found to decrease with parity for women who had short intervals between  
96 their pregnancies (<12 months) while the increase in birthweight with parity was more  
97 pronounced in women with long intervals (>24 months)<sup>20</sup>. Also, maternal weight change  
98 between pregnancies was found to modify the relationship between parity and birthweight.  
99 Women who returned to their pre-pregnancy weight before the next conception had infants  
100 who weighed less than infants of women who retained or gained weight between  
101 pregnancies<sup>20</sup>. In a UK-based study, women who lost at least six kilograms between their  
102 first and second pregnancy had a smaller average increase in birthweight of the second  
103 baby compared to women who gained ten kilograms or more (in a 1.60m tall woman, 6 kg  
104 equates to approximately 2.3 kg/m<sup>2</sup> and 10 kg to approximately 3.8 kg/m<sup>2</sup>)<sup>18</sup>.

105 A large US study showed that women were at an increased risk of having an LGA baby in  
106 the second pregnancy if their pre-pregnancy BMI category increased towards overweight or  
107 obese between their first and second pregnancies. This applied to all first pregnancy BMI  
108 categories, except underweight women who became normal weight by the start of their  
109 second pregnancy. Overweight and obese women who dropped BMI category by their  
110 second pregnancy remained at an increased risk of LGA birth, but had a lower risk  
111 compared to women whose BMI category increased between pregnancies<sup>21</sup>.

112 Another US-based study showed that inter-pregnancy weight gain of  $\geq 2$  kg/m<sup>2</sup> in obese  
113 women was associated with increased risk of LGA. Weight loss of  $\geq 2$  kg/m<sup>2</sup> was associated  
114 with a lower adjusted LGA risk compared to the women who maintained their weight within 2  
115 kg/m<sup>2</sup> change between pregnancies<sup>22</sup>.

116 Two studies found a reduced risk of 'new' LGA in the second pregnancy following a non-  
117 LGA birth in the first pregnancy with inter-pregnancy weight loss of  $>1$  kg/m<sup>2</sup>, and an  
118 increased risk with modest (1-3 kg/m<sup>2</sup>) and large ( $\geq 3$  kg/m<sup>2</sup>) weight gain. In stratified  
119 analysis, the association was stronger in women with a first pregnancy BMI of  $<25$  kg/m<sup>2</sup>  
120 <sup>23,24</sup>. A third study only found an increased risk of 'new' LGA in normal weight women who  
121 gained  $\geq 4$  kg/m<sup>2</sup> between pregnancies and no association in overweight women<sup>25</sup>.

122 To our knowledge, only one study has examined the risk of recurrent LGA (occurring in both  
123 first and second pregnancies) in relation to maternal weight change between pregnancies <sup>26</sup>.  
124 The study, conducted in Aberdeen, Scotland, included 24520 women of which 813 women  
125 had LGA births in both pregnancies. Inter-pregnancy weight gain ( $\geq 2$  kg/m<sup>2</sup>) was associated

1  
2  
3 126 with increased risk of recurrent LGA, while weight loss ( $\geq 2$  kg/m<sup>2</sup>) was protective. Women  
4 127 with BMI  $< 25$  kg/m<sup>2</sup> were at increased risk of recurrent LGA on gaining weight whereas  
5 128 women with BMI  $\geq 25$  kg/m<sup>2</sup> were at reduced risk of recurrent LGA on losing weight<sup>26</sup>.

7 129 In this study, we aimed to investigate the association between the incidence of LGA,  
8 130 recurrent LGA and 'new' LGA births in the second pregnancy and maternal change in BMI  
9 131 between the first and second pregnancies, stratifying by maternal BMI category in the first  
10 132 pregnancy, in a population-based cohort in the South of England.

12 133

14 134

## 16 135 **Methods**

18 136 This is a population-based cohort of prospectively collected routine healthcare data for  
19 137 antenatal care between January 2003 and September 2017 at University Hospital  
20 138 Southampton, Hampshire, UK. This included all women delivering at this hospital (n= 82098  
21 139 pregnancies), which is a regional centre for maternity care in and around Southampton.  
22 140 Records of women with their first two consecutive singleton live birth pregnancies were  
23 141 included. Records with unfeasible weight ( $< 30$  kg), height ( $> 2$  m) and gestational age ( $> 301$   
24 142 days) values were excluded.

26 143

### 28 144 *Exposure assessment*

30 145 Maternal weight in kilograms was routinely measured by a midwife at the first antenatal  
31 146 (booking) appointment of each pregnancy, which is recommended to take place ideally by 10  
32 147 weeks gestation in the UK, according to the National Institute for Health and Care  
33 148 Excellence Guidelines<sup>27</sup>. Any woman who had a booking appointment at or after 24 weeks  
34 149 of pregnancy was excluded. Height was self-reported. BMI was calculated as weight (in kg)  
35 150 divided by height (in metres) squared.

36 151 BMI at the start of the first pregnancy was categorised as underweight (BMI  $< 18.5$  kg/m<sup>2</sup>),  
37 152 normal weight (18.5 to 24.9 kg/m<sup>2</sup>), overweight (25.0 to 29.9 kg/m<sup>2</sup>) and obese ( $\geq 30$  kg/m<sup>2</sup>).  
38 153 Change in BMI was calculated as the difference in BMI measured at the booking  
39 154 appointments of the first two consecutive live birth pregnancies for each woman. This  
40 155 change in BMI was then categorised as weight loss ( $\geq 1$  kg/m<sup>2</sup>), weight stable ( $-1$  to  $1$  kg/m<sup>2</sup>)  
41 156 and two categories of weight gain ( $1-3$  kg/m<sup>2</sup> and  $\geq 3$  kg/m<sup>2</sup>).

44 157

### 46 158 *Outcome assessment*

47 159 Birthweight (grams) was measured by healthcare professionals at birth as part of routine  
48 160 care. Gestational age was based on a dating ultrasound scan which routinely takes place  
49 161 between 10 and 13 weeks gestation<sup>27</sup>. Age- and gender- specific birthweight centiles were  
50 162 calculated using reference values for England and Wales provided in the most recently  
51 163 released national data<sup>28</sup>. Large-for-gestational age was defined as  $> 90$ th percentile weight  
52 164 for gestational age. This was only defined for babies born between 24 to 42 weeks gestation  
53 165 as reference values only exist for these gestational ages and with determinate gender.

55 166

### 57 167 *Covariates*

58 168 Maternal date of birth is recorded at the booking appointment and converted to age (in  
59 169 years) on extraction of the dataset to maintain anonymity. Highest maternal educational

1  
2  
3 170 qualification was self-reported and categorised as primary, secondary, college,  
4 171 undergraduate, postgraduate, graduate and none. For the purposes of this analysis, this was  
5 172 condensed to three categories - secondary (GCSE) and under, college (A levels) and  
6 173 university degree or above. Self-reported ethnicity was recorded under 16 categories and  
7 174 condensed to White, Mixed, Asian, Black/African/Caribbean and Other. Categories of not  
8 175 asked and not stated were coded as missing. Smoking was self-reported as current smoking  
9 176 or non-smoking. Non-smokers were further asked if they had ever smoked or had previously  
10 177 smoked and quit. This was categorised as stopped more than 12 months before conception,  
11 178 stopped less than 12 months before conception or stopped when pregnancy confirmed.  
12 179 Employment status was self-reported at booking appointment and categorised as employed,  
13 180 unemployed, in education, and not specified. Infertility treatment was categorised as  
14 181 no/investigations only and yes (hormonal only, in-vitro fertilisation, gamete intrafallopian  
15 182 transfer and other surgical) in either one or both pregnancies. In this population, an oral  
16 183 glucose tolerance test was used for screening for GDM in women with one or more risk  
17 184 factors (BMI > 30kg/m<sup>2</sup>; GDM in previous pregnancy; previous baby weighing ≥4.5kg;  
18 185 diabetes in parents or siblings and of Asian, African-Caribbean or Middle Eastern  
19 186 ethnicity)<sup>29</sup>. GDM diagnosis was then reported in the database. Inter-pregnancy interval was  
20 187 defined as the interval between the first live birth and conception of the second pregnancy.  
21 188 The difference in days between two consecutive live births was calculated and gestational  
22 189 age of the latter birth subtracted from this to derive the inter-pregnancy interval.

25 190

### 27 191 *Statistical analysis*

28  
29 192 All analysis was performed using Stata 15<sup>30</sup>. Univariable comparisons were carried out using  
30 193 ANOVA for continuous variables and chi square test for categorical variables. Generalised  
31 194 linear regression with log link<sup>31</sup> was used to examine the association between the  
32 195 categorised variable of maternal change in BMI between pregnancies with risk of LGA in the  
33 196 second pregnancy. This was analysed first in the whole sample and then stratified by  
34 197 'baseline' maternal BMI category as calculated in the first antenatal appointment of the first  
35 198 pregnancy.

37 199 Risk of LGA in the second pregnancy was explored in the whole sample adjusting for  
38 200 previous pregnancy outcome of LGA. The risk of 'new' LGA in second pregnancy after  
39 201 having a non-LGA baby in the first pregnancy was explored in the sub-sample of women  
40 202 who had non-LGA births in the first pregnancy. The risk of recurrent LGA (LGA in both  
41 203 pregnancies) was explored in a sub-sample of women who had LGA births in the first  
42 204 pregnancy.

45 205 Initial univariable analysis was followed by multivariable models adjusting for potential  
46 206 confounding factors – maternal age, ethnicity, highest educational qualification, whether or  
47 207 not undergone infertility treatment, employment status, smoking behaviour in second  
48 208 pregnancy, baseline BMI, GDM in second pregnancy and inter-pregnancy interval.  
49 209 Sensitivity analysis was conducted adding gestational age at booking in the second  
50 210 pregnancy to the models.

51 211 A statistical significance level of 0.05 with 95% confidence intervals was used in the  
52 212 regression models.

54 213

### 56 214 *Ethical considerations*

58 215 All data were fully anonymised by the data holder before being accessed by the research  
59 216 team. Ethics approval was granted by the University of Southampton Faculty of Medicine  
60 217 Ethics Committee: study ID 25508.



218

### 219 *Patient and Public Involvement*

220 Patients and public were not involved in setting the research question or the outcome  
221 measures, nor were they involved in developing plans for the design or implementation of  
222 the study. However, pregnant woman and mothers of young children have been involved in  
223 the planning stages of a research project building on this analysis.

224

225

### 226 **Results**

227 The first and second pregnancies of 15940 women were included. Of these, 16.0% of  
228 women lost  $\geq 1$  kg/m<sup>2</sup>, 36.3% remained weight stable (-1 to 1 kg/m<sup>2</sup>), 27.9% gained 1-3 kg/m<sup>2</sup>  
229 and 19.8% gained  $\geq 3$  kg/m<sup>2</sup> between their first and second live birth pregnancies. Weight  
230 loss of  $>2$  kg/m<sup>2</sup> was observed in 7.3% of women whereas 30.5% gained  $>2$  kg/m<sup>2</sup>. Mean  
231 BMI at second pregnancy booking was 30.8 kg/m<sup>2</sup> (standard deviation (SD) 5.9) in women  
232 who gained  $\geq 3$  kg/m<sup>2</sup>, 25.9 kg/m<sup>2</sup> (SD 4.7) in women who gained 1-3kg/m<sup>2</sup>, 24.1 kg/m<sup>2</sup> (SD  
233 5.1) in women who lost weight, and 23.8 kg/m<sup>2</sup> (SD 4.4) women whose weight remained  
234 stable between pregnancies ( $p < 0.001$ ) (Table 1).

235 Women who gained  $\geq 3$  kg/m<sup>2</sup> by the start of their second pregnancy were more likely to be  
236 smokers, unemployed, with lower educational attainment and to have a longer inter-  
237 pregnancy interval, compared to those who maintained a stable weight between  
238 pregnancies. Mean maternal age was lowest in the women who gained  $\geq 3$  kg/m<sup>2</sup> (27.3  
239 years, SD 5.5) and highest in the women who remained weight stable (29.8 years, SD 5.3).  
240 Mean maternal age in women who lost weight was 28.7 years (SD 5.4).

241 Mothers who gained  $\geq 3$  kg/m<sup>2</sup> were more likely to be obese (48.3%) at the start of the  
242 second pregnancy compared to 16.1% in women who gained 1-3 kg/m<sup>2</sup>, 9.2% in women  
243 who remained weight stable and 11.9% in women who lost  $\leq 1$  kg/m<sup>2</sup>.

244 Figure 1 shows the percentage of women in each BMI category in the first and second  
245 pregnancy and the weight gain over time. There has been a decline in normal weight women  
246 at first pregnancy and a slight increase in overweight and obese women over time. There  
247 also was a slight decline in the percentage of women gaining  $\geq 3$  kg/m<sup>2</sup> and a slight increase  
248 in those gaining 1-3 kg/m<sup>2</sup>.

249 The proportion of LGA births were higher in all BMI categories in the second pregnancy  
250 (Figure 2). A lower proportion of babies born to women who lost weight (12.4%) or remained  
251 weight stable (11.9%) between pregnancies were LGA compared to 13.5% in women who  
252 gained 1-3 kg/m<sup>2</sup> and 15.9% in women who gained  $\geq 3$  kg/m<sup>2</sup> ( $p < 0.001$ ) (Table 1, Figure 3).

253 Compared to normal weight women, overweight and obese women were at increased risk of  
254 LGA births in both pregnancies with risk highest in obese women (unadjusted relative risk  
255 (RR) 2.06, 95% CI 1.78 to 2.38 and 1.86, 95% CI 1.69 to 2.05 in first and second pregnancy  
256 respectively). The lowest proportion of LGA births in the second pregnancy was in  
257 underweight women in the first pregnancy who remained weight stable (2.8%), while the  
258 highest was in obese women who gained  $\geq 3$  kg/m<sup>2</sup> (21.2%). Within BMI categories, recurrent  
259 LGA was lowest in normal weight and overweight women who lost weight and highest in  
260 obese women who gained 1-3 kg/m<sup>2</sup>.

261 Women who gained  $\geq 3$  kg/m<sup>2</sup> were at increased risk of LGA in the second pregnancy in the  
262 full sample compared to remaining weight stable (aRR 1.28, 95% CI 1.14 to 1.44) (Figure 3).

263 There was a significantly reduced risk of recurrent LGA birth in the second pregnancy in  
264 overweight women who had a LGA infant in the first pregnancy and lost  $\geq 1$  kg/m<sup>2</sup> in weight  
265 (aRR 0.69, 95% CI 0.48 to 0.97) (Table 2, supplementary Figure 1). No association was  
266 observed between risk of recurrent LGA and maternal BMI change between pregnancies in  
267 underweight, normal weight and obese women.

268 There was an increased risk of 'new' LGA birth in the second pregnancy after having a non-  
269 LGA infant in the first pregnancy in normal weight women who gained 1-3 kg/m<sup>2</sup> (aRR 1.26,  
270 95% CI 1.06 to 1.50) and in normal weight and overweight women who had gained  $\geq 3$  kg/m<sup>2</sup>  
271 weight (aRR 1.34, 95% CI 1.09 to 1.65, aRR 1.35, 95% CI 1.05 to 1.75, respectively) (Table  
272 3, supplementary Figure 2). No association was observed between the risk of 'new' LGA in  
273 the second pregnancy and maternal BMI inter-pregnancy change in obese women.

274

275

## 276 Discussion

277 This study examined the association between change in women's BMI between their first  
278 and second live birth pregnancies and risk of LGA birth in the second pregnancy in a  
279 population-based cohort of 15940 women in the South of England. Almost half of the sample  
280 (48%) of women gained  $\geq 1$  kg/m<sup>2</sup> in the time between the first antenatal care visits during  
281 their first and second pregnancies. The proportion of LGA births was significantly higher in  
282 women with an inter-pregnancy weight gain of  $\geq 3$  kg/m<sup>2</sup> (16%) compared to women who lost  
283 weight (12%) and those who remained weight stable (12%) between pregnancies.  
284 Overweight women who lost  $\geq 1$  kg/m<sup>2</sup> had a reduced risk of recurrent LGA. Normal weight  
285 women who gained 1-3 kg/m<sup>2</sup> and both normal weight and overweight women who gained  
286  $\geq 3$  kg/m<sup>2</sup> between pregnancies had an increased risk of LGA birth in their second pregnancy  
287 after a non-LGA birth in the first.

288 Compared to the population-based Swedish cohort which carried out a similar analysis for  
289 LGA and other outcomes in 151025 women using data from 1992 to 2001, a lower  
290 proportion of women remained weight stable in our cohort (46% compared to 36%) and a  
291 higher proportion lost (11% compared to 16%) or gained (43% compared to 48%) weight.  
292 Amongst women who gained weight, a higher proportion gained  $\geq 3$  kg/m<sup>2</sup> in this cohort  
293 (20%) compared to the Swedish cohort (11%)<sup>23</sup>. Similarly, in comparison to a population-  
294 based cohort of 24520 women in Aberdeen, Scotland; for the period 1986 to 2013, a larger  
295 proportion of women in our study both lost and gained weight<sup>26</sup>. The differences could reflect  
296 the increase in the prevalence of maternal overweight and obesity over time since our data  
297 are more recent.

298 In the adjusted model utilising the full sample, we showed an increased risk of LGA in the  
299 second pregnancy for inter-pregnancy weight gain compared to weight remaining stable. In a  
300 population-based cohort in the US, women were found to be at increased risk of LGA in the  
301 second pregnancy if their pre-pregnancy BMI category changed towards overweight or  
302 obese from first to second pregnancy regardless of their BMI category in first pregnancy  
303 except in underweight women who increased to normal weight<sup>21</sup>. This study is different to  
304 ours in that it only examined risk in second pregnancy without adjustment for LGA outcome  
305 in first pregnancy. It also considered weight change as change in BMI category only, while  
306 we studied change in maternal BMI regardless of whether BMI category has changed or not  
307 in the second pregnancy.

308 In obese women in the US, inter-pregnancy weight gain of  $\geq 2$  kg/m<sup>2</sup> was associated  
309 with increased risk of LGA and a weight loss of  $\geq 2$  kg/m<sup>2</sup> was associated with

1  
2  
3 310 decreased risk compared to the reference group of weight maintained (between  $>-2$   
4 311 and  $<2 \text{ kg/m}^2$ )<sup>22</sup>. We found no association between weight change and risk of  
5 312 second pregnancy LGA in women who were obese at the start of their first  
6 313 pregnancy. This may be because obese women are already at increased risk of LGA  
7 314 births, and the average inter-pregnancy BMI change in this subgroup was not large  
8 315 enough to detect a further increase in risk. Greater efforts are needed for primary  
9 316 prevention of obesity in women of child bearing age and obese women need more effective  
10 317 weight loss strategies in inter-partum period to assess impact on LGA and other outcomes.

11  
12  
13 318 Risk of recurrent LGA was analysed in one previous study in Scotland which found that inter-  
14 319 pregnancy weight gain ( $\geq 2 \text{ kg/m}^2$ ) was associated with increased risk of recurrent LGA. In  
15 320 that study, weight loss ( $\geq 2 \text{ kg/m}^2$ ) was associated with reduced LGA risk. Stratification by  
16 321 first pregnancy BMI showed that women with BMI  $<25 \text{ kg/m}^2$  were at increased risk of  
17 322 recurrent LGA on gaining  $\geq 2 \text{ kg/m}^2$  whereas women with BMI  $\geq 25 \text{ kg/m}^2$  were at reduced risk  
18 323 of recurrent LGA on losing  $\geq 2 \text{ kg/m}^2$  weight<sup>26</sup>. We showed a similar reduction in risk in  
19 324 overweight women who lost  $\geq 1$  BMI unit between pregnancies, but found no association in  
20 325 normal weight women. This difference in findings may be because the  $<25 \text{ kg/m}^2$  group in the  
21 326 previous Scottish study included underweight women whereas our stratified analysis  
22 327 examined normal weight women separately to underweight women.

23  
24  
25 328 We showed an increased risk of 'new' LGA in the second pregnancy (after a non-LGA birth  
26 329 in the first pregnancy) with inter-pregnancy weight gain compared to remaining weight  
27 330 stable. After stratification by BMI, we found that this association between inter-pregnancy  
28 331 weight gain and new LGA remained only in normal-weight and overweight women. The  
29 332 findings from this study are in line with findings with other studies in Scotland<sup>24</sup> and  
30 333 Sweden<sup>23</sup> which found increased risk of 'new' LGA with modest ( $1-3 \text{ kg/m}^2$ ) and large ( $\geq 3$   
31 334  $\text{kg/m}^2$ ) weight gain. Both studies also found a decreased risk with inter-pregnancy weight  
32 335 loss of  $>1 \text{ kg/m}^2$  which was not found in our study. Both studies stratified BMI as  $<$  and  
33 336  $\geq 25 \text{ kg/m}^2$ , while we further stratified the  $\geq 25 \text{ kg/m}^2$  category as overweight (BMI 25-  
34 337  $29.9 \text{ kg/m}^2$ ) and obese ( $\geq 30 \text{ kg/m}^2$ ) and found an increased risk of 'new' LGA in overweight,  
35 338 but not in obese women. We carried out sensitivity analysis merging overweight and obese  
36 339 categories and found increased risk in this category (data not shown) suggesting that the  
37 340 results are comparable to previous studies.

38  
39  
40 341 Women included in this analysis had a range of inter-pregnancy interval of less than 1 to up  
41 342 to 12 years and thus weight change could be due to postpartum weight retention or late  
42 343 postpartum weight gain. There is evidence that women who do not lose pregnancy weight at  
43 344 one year postpartum are more likely to retain weight longer term<sup>32</sup>. We examined the risk of  
44 345 maternal inter-pregnancy weight gain with length of the inter-pregnancy interval and found  
45 346 that women with an interval of 12-23 months were least likely to start the next pregnancy at a  
46 347 higher weight<sup>33</sup>. We also examined the length of the inter-pregnancy interval as a predictor  
47 348 for LGA risk adjusting for inter-pregnancy weight change and found no association<sup>34</sup>.

48  
49 349 The Development Origins of Health and Disease concept suggests that adverse exposures  
50 350 during development could lead to enhanced susceptibility in the foetus thus increasing the  
51 351 risk of non-communicable diseases in later life. Although the focus has previously been on  
52 352 exposures during pregnancy, the importance of the preconception period is now  
53 353 recognised<sup>35-37</sup>. Efforts to systematically identify women in the preconception period to  
54 354 improve health and lifestyle during conception are underway<sup>37</sup>. Promoting health of all  
55 355 women of child-bearing age with targeting of women and partners planning a pregnancy has  
56 356 been identified as an effective approach to improving preconception health<sup>36</sup>. It is difficult to  
57 357 identify all women who are planning a pregnancy but as the inter-conception period is also  
58 358 the preconception period for the next pregnancy, it is important to engage with women  
59 359 during this period to optimise their and their children's health.



1  
2  
3 360 Future research that characterises the predictors of postpartum weight change would help  
4 361 design interventions to support postpartum weight loss and prevent weight gain. Key to this  
5 362 is an understanding of the pattern of weight change during this period as well as identifying  
6 363 the optimal setting and delivery of the intervention. Support with healthy eating and physical  
7 364 activity is more commonly received during pregnancy than after birth. Even when lifestyle  
8 365 advice is received postpartum, it was found not to be associated with healthy diet or physical  
9 366 activity behaviours<sup>38</sup>. Most interventions that have been successful in limiting and promoting  
10 367 postpartum weight loss were combined diet and physical activity interventions with self-  
11 368 monitoring<sup>39</sup>. However, the timing of engaging women and length of intervention or  
12 369 engagement are important with one study showing that an intervention from 16 weeks  
13 370 pregnancy to six months postpartum was more effective than the same intervention from  
14 371 birth to six months postpartum intervention<sup>40</sup>.

16 372 As pregnancy and early postpartum is a period of major change for women and their  
17 373 families, interventions need to be carefully designed to be attractive, flexible, affordable and  
18 374 feasible for women at this stage with competing priorities and time demands. Focus during  
19 375 the postpartum period in the UK healthcare system is mostly on child health and  
20 376 development. The feasibility and effectiveness of better utilising contact time with health  
21 377 professionals during the two years after birth to engage and support maternal health needs  
22 378 to be explored. There may also be a role for mutual support groups for mothers. There is  
23 379 additionally a need to recognise that weight management issues are greater in more  
24 380 disadvantaged mothers so there is also the issue of identifying the most effective weight  
25 381 management strategies for such mothers to reduce social inequity in subsequent birth and  
26 382 maternal outcomes. Weight gain does not occur in isolation and usually combined with other  
27 383 risk factors particularly in socioeconomically disadvantaged groups and hence a holistic  
28 384 approach taking into account priority setting for these families should be considered.

### 31 385 **Strengths and limitations**

32 386 This is a relatively large population-based cohort including women from all socioeconomic  
33 387 and ethnic backgrounds delivering at a large maternity centre in Southampton, UK, thus  
34 388 representative of the regional population. According to the UK Department of Communities  
35 389 and Local Government English indices of deprivation report, Southampton is more deprived  
36 390 than average with the situation having worsened between 2010 and 2015<sup>41</sup>. However, about  
37 391 half of the women included in this analysis reside in the rest of Hampshire (the region where  
38 392 Southampton is situated), which is less deprived. Our sample was 87% of White ethnicity,  
39 393 which is comparable to the 2011 England and Wales population census of 86% White<sup>42</sup>. The  
40 394 analysis was adjusted for several key confounders that were reasonably complete (96%  
41 395 complete for ethnicity and employment status). Both the maternal weight (used to calculate  
42 396 exposure) and birthweight in this study were objectively measured by healthcare  
43 397 professionals as part of routine antenatal and delivery care.

46 398 An important limitation was the lack of information on gestational weight gain during  
47 399 pregnancy, breastfeeding duration/exclusivity and paternal characteristics/behaviour, which  
48 400 are potential confounders in the association between maternal inter-pregnancy weight gain  
49 401 and LGA birth<sup>43</sup>. We adjusted for if first feed was breast milk as a proxy for breastfeeding  
50 402 initiation in sensitivity analysis and the results remained unchanged (not shown). Women  
51 403 who had their first booking appointment later into the pregnancy (more than 24 weeks) were  
52 404 excluded from the analysis in order to ensure comparability of weight measurements  
53 405 between pregnancies. We also adjusted for gestational age at booking, as this was the point  
54 406 when maternal BMI was measured, in sensitivity analysis and the estimates remained  
55 407 similar. Some of the confounding factors which were accounted for in the analysis were self-  
56 408 reported, however the information was collected prospectively, therefore any measurement  
57 409 error is likely to be non-differential. Another limitation is that these findings are based on  
58 410 observational data so inferences about causation cannot be drawn and the risk of residual  
59 411 confounding influencing the results needs to be considered.

1  
2  
3 412 In conclusion, maternal weight gain of 1 or more kg/m<sup>2</sup> between first and second pregnancy  
4 413 had a prevalence of 48%, and it was associated with risk of LGA in the second pregnancy in  
5 414 this English cohort. Risk of 'new' LGA was higher in normal weight and overweight women  
6 415 who gained weight after a non-LGA birth in their first pregnancy compared to those who  
7 416 remained weight stable. Overweight women were at a lower risk of a recurrent LGA birth in  
8 417 their second pregnancy if they lost weight between pregnancies. Greater efforts are needed  
9 418 for primary prevention of overweight and obesity in women of child bearing age. Supporting  
10 419 efforts to lose weight in overweight and obese women between pregnancies, and stop  
11 420 weight gain in all women planning to have further children (except those who are  
12 421 underweight) are important preventive measures of subsequent adverse maternal and  
13 422 offspring health outcomes.

14 423

### 15 16 424 **Author Contributions**

17  
18  
19 425 Study design (NZ, PJR, NSM, NAA), data analysis (NZ, SW), acquisition and interpretation  
20 426 of the data (NZ, NAA), drafting of the manuscript (NZ), revising for content (NZ, SW, PJR,  
21 427 NSM, NAA) and approval of final version before submission (NZ, SW, PJR, NSM, NAA).  
22 428 NAA is the project's PI.

23 429

### 24 25 430 **Data statement**

26  
27  
28 431 The data owner is University Hospital Southampton NHS Trust. Anonymised data are only  
29 432 available upon request from the PI (NAA) conditional on approval of the appropriate  
30 433 institutional ethics and research governance processes.

31 434

### 32 33 435 **Acknowledgements**

34  
35  
36 436 We would like to thank David Cable (Electronic Patient Records Implementation and Service  
37 437 Manager) and Florina Borca (Senior Information Analyst R&D) at University Hospital  
38 438 Southampton for support in accessing the data used in this study. We also thank clinical  
39 439 colleagues at the Princess Anne Hospital, Southampton for collecting the data.

40 440

### 41 42 441 **Funding**

43  
44  
45 442 This work is supported by a University of Southampton Primary Care and Population  
46 443 Sciences PhD studentship (to NZ), and an Academy of Medical Sciences and Wellcome  
47 444 Trust Grant [AMS\_HOP001\1060 to NAA]. NAA is also in receipt of research support from  
48 445 the National Institute for Health Research through the NIHR Southampton Biomedical  
49 446 Research Centre.

50 447

### 51 52 448 **Competing interests**

53  
54 449 The authors have no competing interests to declare.

55 450

### 56 57 451 **References**

58  
59  
60

1  
2  
3  
4  
5  
6  
7  
8  
9  
10  
11  
12  
13  
14  
15  
16  
17  
18  
19  
20  
21  
22  
23  
24  
25  
26  
27  
28  
29  
30  
31  
32  
33  
34  
35  
36  
37  
38  
39  
40  
41  
42  
43  
44  
45  
46  
47  
48  
49  
50  
51  
52  
53  
54  
55  
56  
57  
58  
59  
60

1. Heslehurst N, Rankin J, Wilkinson JR, et al. A nationally representative study of maternal obesity in England, UK: trends in incidence and demographic inequalities in 619 323 births, 1989-2007. *Int J Obes (Lond)* 2010;34(3):420-8.
2. Poston L. Maternal obesity, gestational weight gain and diet as determinants of offspring long term health. *Best Pract Res Clin Endocrinol Metab* 2012;26(5):627-39.
3. Barker DJP. Fetal origins of coronary heart disease. *BMJ* 1995;311:171-74.
4. Kramer MS, Morin I, Yang H, et al. Why are babies getting bigger? Temporal trends in fetal growth and its determinants. *J Pediatr* 2002;141(4):538-42.
5. Surkan PJ, Hsieh CC, Johansson AL, et al. Reasons for increasing trends in large for gestational age births. *Obstet Gynecol* 2004;104(4):720-6.
6. Reilly JJ, Armstrong J, Dorosty AR, et al. Early life risk factors for obesity in childhood: cohort study. *BMJ* 2005;330(7504):1357.
7. Danielzik S, Czerwinski-Mast M, Langnase K, et al. Parental overweight, socioeconomic status and high birth weight are the major determinants of overweight and obesity in 5-7 y-old children: baseline data of the Kiel Obesity Prevention Study (KOPS). *Int J Obes Relat Metab Disord* 2004;28(11):1494-502.
8. Curhan GC, Willett WC, Rimm EB, et al. Birth Weight and Adult Hypertension, Diabetes Mellitus, and Obesity in US Men. *Circulation* 1996;94:3246-50.
9. Curhan GC, Chertow GM, Willett WC, et al. Birth Weight and Adult Hypertension and Obesity in Women. *Circulation* 1996;94:1310-15.
10. Phillips DIW, Young JB. Birth weight, climate at birth and the risk of obesity in adult life. *International Journal of Obesity* 2000;24:281-87.
11. Casey BM, Lucas MJ, McIntire DD, et al. Pregnancy Outcomes in Women With Gestational Diabetes Compared With the General Obstetric Population. *Obstetrics & Gynecology* 1997;90(6):869-73.
12. Hunt KJ, Schuller KL. The Increasing Prevalence of Diabetes in Pregnancy. *Obstet Gynecol Clin North Am.* 2007;34(2):173-99.
13. Ignell C, Claesson R, Anderberg E, et al. Trends in the prevalence of gestational diabetes mellitus in southern Sweden, 2003-2012. *Acta Obstet Gynecol Scand* 2014;93(4):420-4.
14. Baptiste-Roberts K, Nicholson WK, Wang NY, et al. Gestational diabetes and subsequent growth patterns of offspring: the National Collaborative Perinatal Project. *Matern Child Health J* 2012;16(1):125-32.
15. Zhu Y, Olsen SF, Mendola P, et al. Growth and obesity through the first 7 y of life in association with levels of maternal glycemia during pregnancy: a prospective cohort study. *Am J Clin Nutr* 2016;103(3):794-800.
16. Marchi J, Berg M, Dencker A, et al. Risks associated with obesity in pregnancy, for the mother and baby: a systematic review of reviews. *Obes Rev* 2015;16(8):621-38.
17. Swamy GK, Edwards S, Gelfand A, et al. Maternal age, birth order, and race: differential effects on birthweight. *J Epidemiol Community Health* 2012;66(2):136-42.
18. Wilcox MA, Chang AMZ, Johnson IR. The effects of parity on birthweight using successive pregnancies. *Acta Obstetrica et Gynecologica Scandinavica* 1996;75(5):459-63.
19. Beaty TH, Skjaerven R, Breazeale DR, et al. Analyzing Sibship Correlations in Birth Weight Using Large Sibships From Norway. *Genetic Epidemiology* 1997;14:423-33.
20. Hinkle SN, Albert PS, Mendola P, et al. The association between parity and birthweight in a longitudinal consecutive pregnancy cohort. *Paediatr Perinat Epidemiol* 2014;28(2):106-15.
21. Getahun D, Ananth CV, Peltier MR, et al. Changes in prepregnancy body mass index between the first and second pregnancies and risk of large-for-gestational-age birth. *Am J Obstet Gynecol* 2007;196(6):530 e1-8.
22. Jain AP, Gavard JA, Rice JJ, et al. The impact of interpregnancy weight change on birthweight in obese women. *Am J Obstet Gynecol* 2013;208(3):205 e1-7.
23. Villamor E, Cnattingius S. Interpregnancy weight change and risk of adverse pregnancy outcomes: a population-based study. *Lancet* 2006;368(9542):1164-70.

- 1  
2  
3 507 24. Wallace JL, Bhattacharya S, Campbell DM, et al. Inter-pregnancy weight change impacts  
4 508 placental weight and is associated with the risk of adverse pregnancy outcomes in  
5 509 the second pregnancy. *BMC Pregnancy and Childbirth* 2014;14(40).
- 6 510 25. McBain RD, Dekker GA, Clifton VL, et al. Impact of inter-pregnancy BMI change on  
7 511 perinatal outcomes: a retrospective cohort study. *Eur J Obstet Gynecol Reprod Biol*  
8 512 2016;205:98-104.
- 9 513 26. Wallace JM, Bhattacharya S, Campbell DM, et al. Inter-Pregnancy Weight Change and  
10 514 the Risk of Recurrent Pregnancy Complications. *PLoS One* 2016;11(5):e0154812.
- 11 515 27. National Institute for Health Care and Excellence. Antenatal care for uncomplicated  
12 516 pregnancies. Manchester, UK, 2008.
- 13 517 28. Norris T, Seaton SE, Manktelow BN, et al. Updated birth weight centiles for England  
14 518 and Wales. *Archives of Disease in Childhood. Fetal and Neonatal Edition* 2017.
- 15 519 29. National Health Service. *Gestational Diabetes*.  
16 520 <https://www.nhs.uk/conditions/gestational-diabetes/> (accessed 26/11/2018).
- 17 521 30. Stata Statistical Software: Release 15 [program]. College Station, TX: StataCorp LLC,  
18 522 2017.
- 19 523 31. Cummings P. Methods for estimating adjusted risk ratios. *The Stata Journal*  
20 524 2009;9(2):175-96.
- 21 525 32. Linné Y, Dye L, Barkeling B, et al. Long-Term Weight Development in Women: A 15-  
22 526 Year Follow-up of the Effects of Pregnancy. *Obesity Research* 2004;12(7):1166-78.
- 23 527 33. Ziauddeen N, Roderick PJ, Macklon NS, et al. Length of inter-pregnancy interval and  
24 528 subsequent preconception adiposity: Findings from a population-based cohort in the  
25 529 South of England. *Revue d'Épidémiologie et de Santé Publique* 2018;66:S374.
- 26 530 34. Ziauddeen N, Roderick PJ, Macklon NS, et al. LB5 Is the duration of the preceding inter-  
27 531 pregnancy interval associated with offspring's size at birth? – analysis of a UK  
28 532 population-based cohort. *Journal of Epidemiology and Community Health*  
29 533 2018;72(Suppl 1):A43.
- 30 534 35. Fleming TP, Watkins AJ, Velazquez MA, et al. Origins of lifetime health around the time  
31 535 of conception: causes and consequences. *The Lancet* 2018;391(10132):P1842-52.
- 32 536 36. Barker M, Dombrowski SU, Colbourn T, et al. Intervention strategies to improve nutrition  
33 537 and health behaviours before conception. *The Lancet* 2018;391(10132):P1853-64.
- 34 538 37. Stephenson J, Heslehurst N, Hall H, et al. Before the beginning: nutrition and lifestyle in  
35 539 the preconception period and its importance for future health. *The Lancet*  
36 540 2018;391(10132):P1830-41.
- 37 541 38. van der Pligt P, Olander EK, Ball K, et al. Maternal dietary intake and physical activity  
38 542 habits during the postpartum period: associations with clinician advice in a sample of  
39 543 Australian first time mothers. *BMC Pregnancy Childbirth* 2016;16:27.
- 40 544 39. van der Pligt P, Willcox J, Hesketh KD, et al. Systematic review of lifestyle interventions  
41 545 to limit postpartum weight retention: implications for future opportunities to prevent  
42 546 maternal overweight and obesity following childbirth. *Obes Rev* 2013;14(10):792-805.
- 43 547 40. Huang TT, Yeh CY, Tsai YC. A diet and physical activity intervention for preventing  
44 548 weight retention among Taiwanese childbearing women: a randomised controlled  
45 549 trial. *Midwifery* 2011;27(2):257-64.
- 46 550 41. Department for Communities and Local Government. The English Indices of Deprivation  
47 551 2015, 2015.
- 48 552 42. Office for National Statistics. Ethnicity and National Identity in England and Wales 201,  
49 553 2012.
- 50 554 43. Nohr EA, Vaeth M, Baker JL, et al. Combined associations of prepregnancy body mass  
51 555 index and gestational weight gain with the outcome of pregnancy. *American Journal*  
52 556 *of Clinical Nutrition* 2008;87(6):1750-59.

57 557

58 **Figure legends**

59 558



1  
2  
3 559 Figure 1: The percentage of women in each body mass index (BMI) category in the first and  
4 560 second pregnancy and weight gain over time in the cohort (2003-2017)  
5

6 561 Figure 2: The percentage of large-for-gestational age (LGA) births in first and second  
7 562 pregnancy by maternal body mass index (BMI) category  
8

9 563 Figure 3: The percentage and risk of large-for-gestational age (LGA) births in second  
10 564 pregnancy stratified by maternal inter-pregnancy weight change categories  
11

12 565 Supplementary Figure 1: Associations between risk of recurrent large-for-gestational age  
13 566 (LGA) birth in the second pregnancy and change in maternal body mass index (BMI)  
14 567 between pregnancies as measured at the first antenatal visit of each pregnancy stratified by  
15 568 BMI category in the first pregnancy  
16

17 569 Supplementary Figure 2: Associations between the risk of 'new' large-for-gestational age  
18 570 (LGA) birth in the second pregnancy following a non-LGA birth in the first pregnancy and  
19 571 change in maternal body mass index (BMI) between pregnancies measured at the first  
20 572 antenatal visit of each pregnancy stratified by BMI category in the first pregnancy  
21 573  
22

23 574  
24

25 575 **Table legends:**

26  
27 576 Table 1: Maternal and birth characteristics in the second live birth pregnancy categorised by  
28 577 maternal weight change from the first livebirth pregnancy for the period of January 2003 -  
29 578 September 2017, University Hospital Southampton NHS Foundation Trust, Hampshire,  
30 579 England  
31

32 580 Table 2: Associations between risk of recurrent large-for-gestational age (LGA) birth in the  
33 581 second pregnancy and change in maternal body mass index (BMI) between pregnancies as  
34 582 measured at the first antenatal visit of each pregnancy stratified by BMI category in the first  
35 583 pregnancy  
36

37 584 Table 3: Associations between the risk of 'new' large-for-gestational age (LGA) birth in the  
38 585 second pregnancy following a non-LGA birth in the first pregnancy and change in maternal  
39 586 body mass index (BMI) between pregnancies measured at the first antenatal visit of each  
40 587 pregnancy stratified by BMI category in the first pregnancy  
41  
42  
43  
44  
45  
46  
47  
48  
49  
50  
51  
52  
53  
54  
55  
56  
57  
58  
59  
60

Table 1: Maternal and birth characteristics in the second live birth pregnancy categorised by maternal weight change gain from the first live birth pregnancy for the period of January 2003 - September 2017, University Hospital Southampton NHS Foundation Trust, Hampshire, England

|                                                            | Lost $\leq -1$ kg/m <sup>2</sup> from previous pregnancy | Weight stable ( $>-1$ to $<1$ kg/m <sup>2</sup> ) | Gained 1-3 kg/m <sup>2</sup> from previous pregnancy | Gained $\geq 3$ kg/m <sup>2</sup> from previous pregnancy | p*     |
|------------------------------------------------------------|----------------------------------------------------------|---------------------------------------------------|------------------------------------------------------|-----------------------------------------------------------|--------|
| N                                                          | 2548                                                     | 5785                                              | 4446                                                 | 3161                                                      |        |
| Maternal age, years (mean $\pm$ SD)                        | 28.7 $\pm$ 5.4                                           | 29.8 $\pm$ 5.3                                    | 29.2 $\pm$ 5.4                                       | 27.3 $\pm$ 5.5                                            | <0.001 |
| Timing of first booking appointment, weeks (mean $\pm$ SD) | 10.8 $\pm$ 2.3                                           | 11.0 $\pm$ 2.3                                    | 11.1 $\pm$ 2.4                                       | 11.0 $\pm$ 2.6                                            | <0.001 |
| Maternal BMI at booking, kg/m <sup>2</sup> (mean $\pm$ SD) | 24.1 $\pm$ 5.1                                           | 23.8 $\pm$ 4.4                                    | 25.9 $\pm$ 4.7                                       | 30.8 $\pm$ 5.9                                            | <0.001 |
| Maternal BMI at booking in first pregnancy (%; 95% CI)     |                                                          |                                                   |                                                      |                                                           | <0.001 |
| Underweight ( $< 18.5$ )                                   | 0.8 (0.5 to 1.2)                                         | 4.3 (3.8 to 4.8)                                  | 5.3 (4.7 to 6.0)                                     | 3.7 (3.1 to 4.4)                                          |        |
| Normal weight (18.5 to 24.9)                               | 47.6 (45.6 to 49.5)                                      | 67.4 (66.2 to 68.6)                               | 62.5 (61.0 to 63.9)                                  | 49.0 (47.2 to 50.7)                                       |        |
| Overweight (25.0 to 29.9)                                  | 30.1 (28.3 to 31.9)                                      | 19.4 (18.4 to 20.5)                               | 22.0 (20.8 to 23.3)                                  | 29.5 (28.0 to 31.2)                                       |        |
| Obese ( $\geq 30.0$ )                                      | 21.5 (19.9 to 23.2)                                      | 8.9 (8.2 to 9.7)                                  | 10.2 (9.3 to 11.1)                                   | 17.8 (16.5 to 19.2)                                       |        |
| Maternal BMI at booking in second pregnancy (%; 95% CI)    |                                                          |                                                   |                                                      |                                                           | <0.001 |
| Underweight ( $< 18.5$ )                                   | 6.9 (5.9 to 7.9)                                         | 4.3 (3.8 to 4.8)                                  | 0.6 (0.4 to 0.9)                                     | 0.0 (0.0 to 0.2)                                          |        |
| Normal weight (18.5 to 24.9)                               | 61.1 (59.2 to 63.0)                                      | 66.8 (65.6 to 68.1)                               | 50.7 (49.2 to 52.1)                                  | 14.9 (13.7 to 16.2)                                       |        |
| Overweight (25.0 to 29.9)                                  | 20.1 (18.6 to 21.7)                                      | 19.7 (18.7 to 20.7)                               | 32.6 (31.2 to 34.0)                                  | 36.7 (35.0 to 38.4)                                       |        |
| Obese ( $\geq 30.0$ )                                      | 11.9 (10.7 to 13.3)                                      | 9.2 (8.5 to 10.0)                                 | 16.1 (15.0 to 17.2)                                  | 48.3 (46.6 to 50.1)                                       |        |
| Maternal smoking status at booking (%; 95% CI)             |                                                          |                                                   |                                                      |                                                           | <0.001 |
| Never smoked/quit                                          | 57.2 (55.3 to 59.2)                                      | 63.0 (61.8 to 64.3)                               | 60.5 (59.0 to 62.0)                                  | 50.7 (48.9 to 52.4)                                       |        |
| Stopped $>1$ year before conceiving                        | 16.1 (14.6 to 17.5)                                      | 17.2 (16.3 to 18.2)                               | 17.7 (16.5 to 18.8)                                  | 14.9 (13.7 to 16.2)                                       |        |
| Stopped $<1$ year prior to conceiving                      | 4.0 (3.3 to 4.8)                                         | 2.8 (2.4 to 3.2)                                  | 3.5 (3.0 to 4.1)                                     | 4.9 (4.2 to 5.7)                                          |        |
| Stopped when pregnancy confirmed                           | 6.8 (5.8 to 7.8)                                         | 5.9 (5.3 to 6.6)                                  | 6.9 (6.2 to 7.7)                                     | 10.3 (9.3 to 11.4)                                        |        |
| Continued smoking                                          | 15.9 (14.5 to 17.4)                                      | 11.0 (10.2 to 11.8)                               | 11.4 (10.5 to 12.4)                                  | 19.1 (17.8 to 20.6)                                       |        |
| Maternal education (%; 95% CI)                             |                                                          |                                                   |                                                      |                                                           | <0.001 |
| Secondary (GCSE) or under                                  | 30.7 (28.9 to 32.5)                                      | 24.0 (22.9 to 25.2)                               | 29.4 (28.1 to 30.8)                                  | 36.3 (34.6 to 38.0)                                       |        |
| College (A levels)                                         | 40.4 (38.5 to 42.3)                                      | 38.8 (37.6 to 40.1)                               | 39.5 (38.1 to 41.0)                                  | 45.8 (44.0 to 47.5)                                       |        |



|                                          |                     |                     |                     |                     |        |
|------------------------------------------|---------------------|---------------------|---------------------|---------------------|--------|
| University degree or above               | 28.9 (27.2 to 30.7) | 37.1 (35.9 to 38.4) | 31.1 (29.7 to 32.5) | 17.9 (16.6 to 19.3) |        |
| Maternal employment (% , 95% CI)         |                     |                     |                     |                     |        |
| Employed                                 | 66.2 (64.3 to 68.0) | 71.7 (70.5 to 72.9) | 67.2 (65.8 to 68.5) | 56.5 (54.8 to 58.2) | <0.001 |
| Unemployed                               | 31.8 (30.0 to 33.7) | 26.9 (25.8 to 28.1) | 31.1 (29.7 to 32.5) | 41.6 (39.8 to 43.3) |        |
| In education                             | 0.9 (0.6 to 1.4)    | 0.8 (0.6 to 1.1)    | 1.1 (0.8 to 1.4)    | 1.3 (0.9 to 1.8)    |        |
| Not specified                            | 1.0 (0.7 to 1.5)    | 0.6 (0.4 to 0.8)    | 0.7 (0.5 to 1.0)    | 0.6 (0.4 to 1.0)    |        |
| Ethnicity (% , 95% CI)                   |                     |                     |                     |                     |        |
| White                                    | 89.9 (88.7 to 91.1) | 88.0 (87.1 to 88.8) | 85.1 (84.0 to 86.1) | 84.8 (83.5 to 86.1) | <0.001 |
| Mixed                                    | 0.8 (0.5 to 1.3)    | 0.9 (0.7 to 1.2)    | 1.4 (1.1 to 1.8)    | 1.6 (1.1 to 2.0)    |        |
| Asian                                    | 4.8 (4.0 to 5.7)    | 5.6 (5.0 to 6.0)    | 7.2 (6.5 to 8.0)    | 7.7 (6.8 to 8.7)    |        |
| Black/African/Caribbean                  | 0.6 (0.4 to 1.0)    | 1.0 (0.8 to 1.3)    | 1.6 (1.3 to 2.1)    | 2.4 (1.9 to 3.0)    |        |
| Other                                    | 0.7 (0.4 to 1.1)    | 1.0 (0.8 to 1.3)    | 1.0 (0.8 to 1.4)    | 1.3 (0.9 to 1.7)    |        |
| Not specified                            | 3.1 (2.5 to 3.9)    | 3.5 (3.0 to 4.0)    | 3.6 (3.1 to 4.2)    | 2.2 (1.8 to 2.8)    |        |
| Inter-pregnancy interval (median, IQR)   | 21.7 (14.4 to 32.7) | 21.6 (14.1 to 32.0) | 23.7 (14.4 to 35.6) | 27.7 (16.0 to 45.6) | <0.001 |
| Inter-pregnancy interval (% , 95% CI)    |                     |                     |                     |                     |        |
| 0-11 months                              | 17.4 (15.9 to 18.9) | 17.6 (16.6 to 18.6) | 18.1 (17.0 to 19.3) | 16.6 (15.4 to 17.9) | <0.001 |
| 12-23 months                             | 39.8 (37.8 to 41.7) | 39.9 (38.6 to 41.1) | 33.1 (31.7 to 34.5) | 26.3 (24.8 to 27.9) |        |
| 24-35 months                             | 22.6 (21.0 to 24.2) | 23.6 (22.5 to 24.7) | 24.4 (23.2 to 25.7) | 20.5 (19.1 to 21.9) |        |
| 36 months or more                        | 20.3 (18.7 to 21.9) | 18.9 (17.9 to 20.0) | 24.3 (23.1 to 25.6) | 36.5 (34.9 to 38.2) |        |
| Birthweight, grams (mean ± SD)           | 3463 ± 563          | 3467 ± 523          | 3507 ± 536          | 3531 ± 558          |        |
| Previous size at birth (first pregnancy) |                     |                     |                     |                     |        |
| Small-for-gestational age                | 13.1 (11.8 to 14.4) | 12.6 (11.8 to 13.5) | 11.7 (10.8 to 12.7) | 12.4 (11.3 to 13.6) | 0.11   |
| Appropriate-for-gestational age          | 79.6 (77.9 to 81.1) | 81.1 (80.0 to 82.1) | 81.2 (80.1 to 82.4) | 79.9 (78.4 to 81.3) |        |
| Large-for-gestational age                | 7.4 (6.4 to 8.5)    | 6.3 (5.7 to 7.0)    | 7.1 (6.3 to 7.8)    | 7.7 (6.8 to 8.7)    |        |
| Size at birth (second pregnancy)         |                     |                     |                     |                     |        |
| Small-for-gestational age                | 8.7 (7.6 to 9.8)    | 7.0 (6.4 to 7.7)    | 6.2 (5.5 to 6.9)    | 6.7 (5.9 to 7.6)    | <0.001 |
| Appropriate-for-gestational age          | 79.0 (77.3 to 80.5) | 81.1 (80.0 to 82.1) | 80.3 (79.1 to 81.5) | 77.4 (75.9 to 78.9) |        |
| Large-for-gestational age                | 12.4 (11.1 to 13.7) | 11.9 (11.1 to 12.8) | 13.5 (12.5 to 14.5) | 15.9 (14.6 to 17.2) |        |

\*p values calculated using ANOVA for continuous and chi square test for categorical variables

Table 2: Associations between risk of recurrent large-for-gestational age (LGA) birth in the second pregnancy and change in maternal body mass index (BMI) between pregnancies as measured at the first antenatal visit of each pregnancy stratified by BMI category in the first pregnancy

| Maternal BMI change (categorised)                         |            | Full sample         |                      |              | Normal weight at first pregnancy |      |              | Overweight at first pregnancy |             |                     | Obese at first pregnancy |      |              |
|-----------------------------------------------------------|------------|---------------------|----------------------|--------------|----------------------------------|------|--------------|-------------------------------|-------------|---------------------|--------------------------|------|--------------|
|                                                           |            | Total n, n of cases | Relative risk, (RR)* | 95% CI       | Total n, n of cases              | RR*  | 95% CI       | Total n, n of cases           | RR*         | 95% CI              | Total n, n of cases      | RR*  | 95% CI       |
| Total unadjusted n, n of cases                            |            | 1109, 530           |                      |              | 521, 234                         |      |              | 338, 170                      |             |                     | 236, 122                 |      |              |
| Lost $\leq$ -1 kg/m <sup>2</sup> from previous pregnancy  | Unadjusted | 188, 83             | 0.89                 | 0.74 to 1.08 | 45, 17                           | 0.80 | 0.54 to 1.20 | 74, 30                        | <b>0.68</b> | <b>0.50 to 0.94</b> | 69, 36                   | 1.16 | 0.79 to 1.69 |
|                                                           | Adjusted** | 178, 78             | 0.88                 | 0.72 to 1.07 | 44, 16                           | 0.79 | 0.54 to 1.17 | 68, 27                        | <b>0.69</b> | <b>0.48 to 0.97</b> | 66, 35                   | 1.21 | 0.79 to 1.83 |
| Weight stable (>-1 to <1 kg/m <sup>2</sup> )              | Unadjusted | 365, 181            | Ref                  |              | 212, 100                         | Ref  |              | 98, 58                        | Ref         |                     | 51, 23                   | Ref  |              |
|                                                           | Adjusted** | 353, 176            | Ref                  |              | 204, 96                          | Ref  |              | 97, 57                        | Ref         |                     | 49, 23                   | Ref  |              |
| Gained 1-3 kg/m <sup>2</sup> from previous pregnancy      | Unadjusted | 313, 150            | 0.97                 | 0.83 to 1.13 | 162, 74                          | 0.97 | 0.78 to 1.21 | 90, 43                        | 0.81        | 0.62 to 1.06        | 55, 31                   | 1.25 | 0.85 to 1.83 |
|                                                           | Adjusted** | 301, 142            | 0.98                 | 0.84 to 1.15 | 156, 70                          | 1.02 | 0.83 to 1.27 | 86, 40                        | 0.81        | 0.61 to 1.08        | 53, 30                   | 1.28 | 0.86 to 1.91 |
| Gained $\geq$ 3 kg/m <sup>2</sup> from previous pregnancy | Unadjusted | 243, 116            | 0.96                 | 0.81 to 1.14 | 102, 43                          | 0.89 | 0.68 to 1.17 | 76, 39                        | 0.87        | 0.66 to 1.14        | 61, 32                   | 1.16 | 0.79 to 1.71 |
|                                                           | Adjusted** | 234, 111            | 1.00                 | 0.83 to 1.20 | 96, 39                           | 0.91 | 0.68 to 1.21 | 73, 38                        | 0.91        | 0.67 to 1.25        | 61, 32                   | 1.28 | 0.84 to 1.94 |

\*Generalised linear model with log link and robust variance estimator used to derive RR

\*\*Adjusted for: maternal age, ethnicity, highest educational qualification, whether undergone infertility treatment, smoking status, employment status, baseline BMI, gestational diabetes in current pregnancy and inter-pregnancy interval

Table 3: Associations between the risk of 'new' large-for-gestational age (LGA) birth in the second pregnancy following a non-LGA birth in the first pregnancy and change in maternal body mass index (BMI) between pregnancies measured at the first antenatal visit of each pregnancy stratified by BMI category in the first pregnancy

| Maternal BMI change (categorised)                    |            | Full sample         |                      |                     | Underweight at first pregnancy |             |                     | Normal weight at first pregnancy |             |                     | Overweight at first pregnancy |             |                     | Obese at first pregnancy |      |              |
|------------------------------------------------------|------------|---------------------|----------------------|---------------------|--------------------------------|-------------|---------------------|----------------------------------|-------------|---------------------|-------------------------------|-------------|---------------------|--------------------------|------|--------------|
|                                                      |            | Total n, n of cases | Relative risk, (RR)* | 95% CI              | Total n, n of cases            | RR*         | 95% CI              | Total n, n of cases              | RR*         | 95% CI              | Total n, n of cases           | RR*         | 95% CI              | Total n, n of cases      | RR*  | 95% CI       |
| Total unadjusted n, n of cases                       |            | 14788, 1573         |                      |                     | 606, 24                        |             |                     | 8888, 812                        |             |                     | 3458, 454                     |             |                     | 1836, 283                |      |              |
| Lost ≤ -1 kg/m <sup>2</sup> from previous pregnancy  | Unadjusted | 2351, 232           | 1.05                 | 0.91 to 1.22        | -                              | -           | -                   | 1163, 85                         | 0.88        | 0.68 to 1.14        | 690, 79                       | 0.95        | 0.73 to 1.24        | 477, 68                  | 0.90 | 0.67 to 1.23 |
|                                                      | Adjusted** | 2258, 222           | 0.94                 | 0.80 to 1.10        | -                              | -           | -                   | 1108, 81                         | 0.87        | 0.68 to 1.12        | 663, 76                       | 0.96        | 0.72 to 1.29        | 466, 65                  | 0.95 | 0.67 to 1.34 |
| Weight stable (>-1 to <1 kg/m <sup>2</sup> )         | Unadjusted | 5411, 508           | Ref                  |                     | 244, 7                         | Ref         |                     | 3680, 305                        | Ref         |                     | 1024, 123                     | Ref         |                     | 463, 73                  | Ref  |              |
|                                                      | Adjusted** | 5191, 489           | Ref                  |                     | 234, 7                         | Ref         |                     | 3519, 292                        | Ref         |                     | 985, 118                      | Ref         |                     | 453, 72                  | Ref  |              |
| Gained 1-3 kg/m <sup>2</sup> from previous pregnancy | Unadjusted | 4122, 450           | <b>1.16</b>          | <b>1.03 to 1.31</b> | 230, 8                         | 1.21        | 0.45 to 3.29        | 2606, 259                        | <b>1.20</b> | <b>1.02 to 1.40</b> | 888, 127                      | 1.19        | 0.94 to 1.50        | 398, 56                  | 0.89 | 0.65 to 1.23 |
|                                                      | Adjusted** | 3944, 427           | 1.13                 | 0.99 to 1.28        | 222, 7                         | 1.04        | 0.36 to 3.04        | 2497, 251                        | <b>1.26</b> | <b>1.06 to 1.50</b> | 839, 115                      | 1.16        | 0.89 to 1.50        | 386, 54                  | 0.86 | 0.61 to 1.22 |
| Gained ≥3 kg/m <sup>2</sup> from previous pregnancy  | Unadjusted | 2904, 383           | <b>1.40</b>          | <b>1.24 to 1.59</b> | 111, 9                         | <b>2.83</b> | <b>1.08 to 7.40</b> | 1439, 163                        | <b>1.37</b> | <b>1.14 to 1.64</b> | 856, 125                      | 1.22        | 0.96 to 1.53        | 498, 86                  | 1.10 | 0.82 to 1.46 |
|                                                      | Adjusted** | 2822, 364           | <b>1.34</b>          | <b>1.17 to 1.54</b> | 104, 6                         | 2.08        | 0.67 to 6.51        | 1389, 151                        | <b>1.34</b> | <b>1.09 to 1.65</b> | 839, 123                      | <b>1.35</b> | <b>1.05 to 1.75</b> | 490, 84                  | 1.21 | 0.89 to 1.65 |

\*Generalised linear model with log link and robust variance estimator used to derive RR

\*\*Adjusted for: maternal age, ethnicity, highest educational qualification, whether undergone infertility treatment, smoking status, employment status, baseline BMI, gestational diabetes in current pregnancy and inter-pregnancy interval

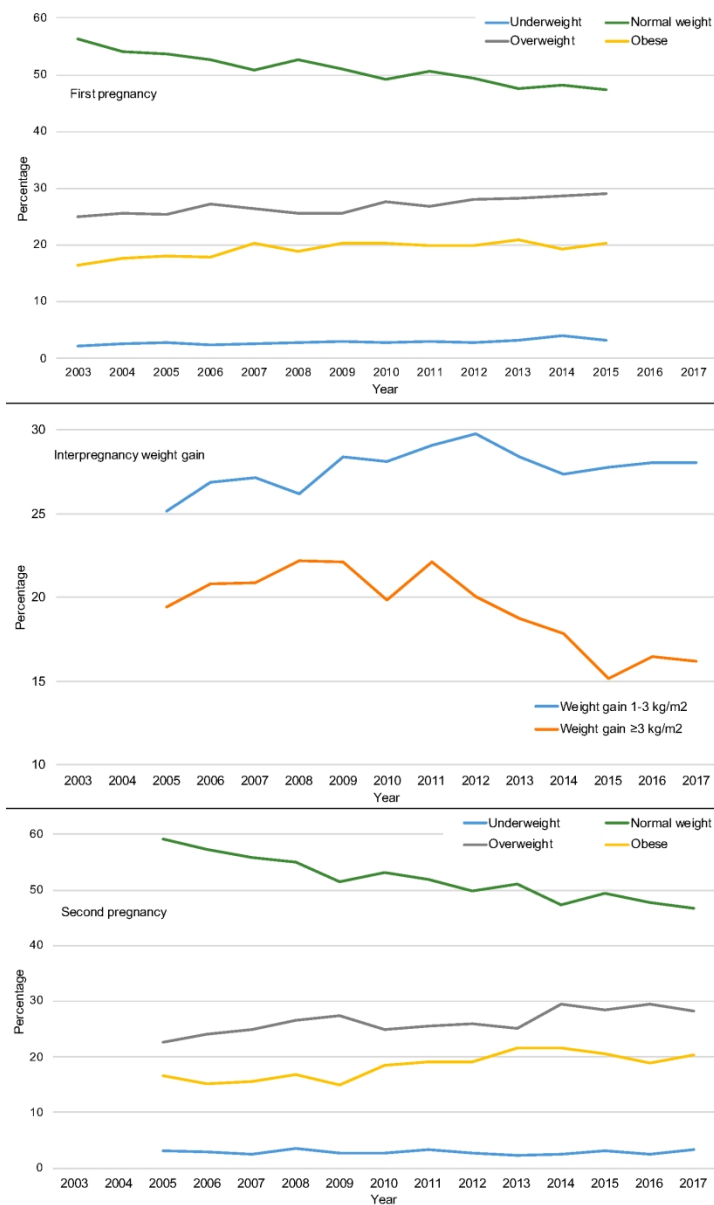

Figure 1: The percentage of women in each body mass index (BMI) category in the first and second pregnancy and weight gain over time in the cohort (2003-2017)

218x367mm (200 x 200 DPI)

1  
2  
3  
4  
5  
6  
7  
8  
9  
10  
11  
12  
13  
14  
15  
16  
17  
18  
19  
20  
21  
22  
23  
24  
25  
26  
27  
28  
29  
30  
31  
32  
33  
34  
35  
36  
37  
38  
39  
40  
41  
42  
43  
44  
45  
46  
47  
48  
49  
50  
51  
52  
53  
54  
55  
56  
57  
58  
59  
60

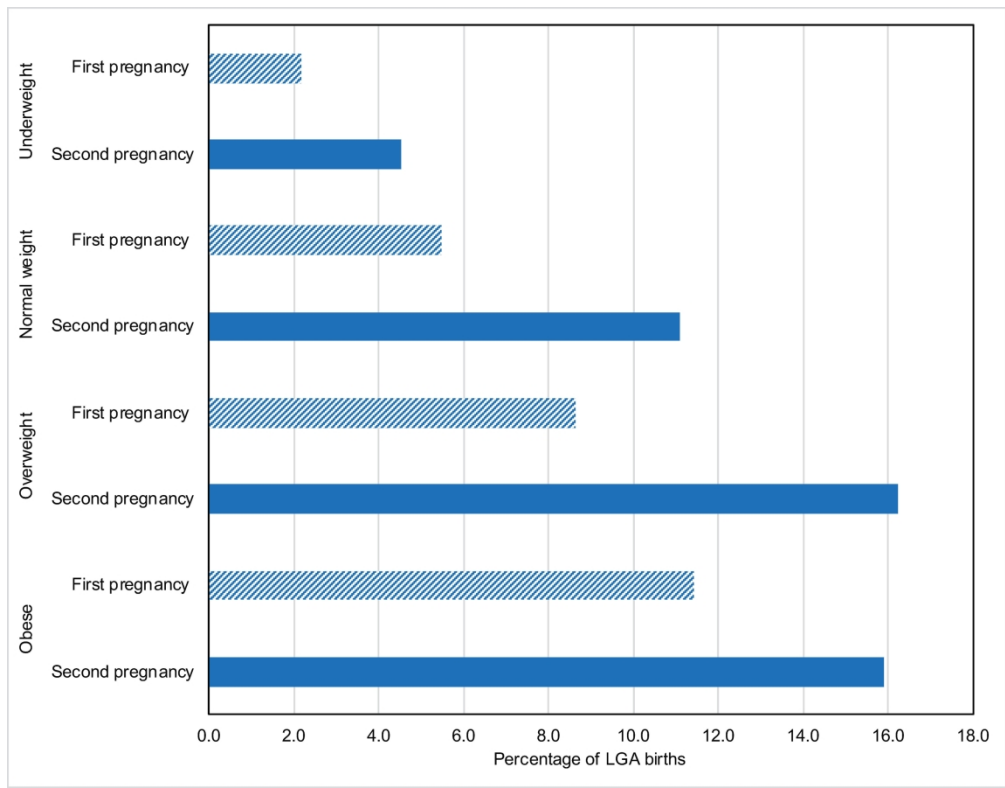

Figure 2: The percentage of large-for-gestational age (LGA) births in first and second pregnancy by maternal body mass index (BMI) category

226x176mm (300 x 300 DPI)

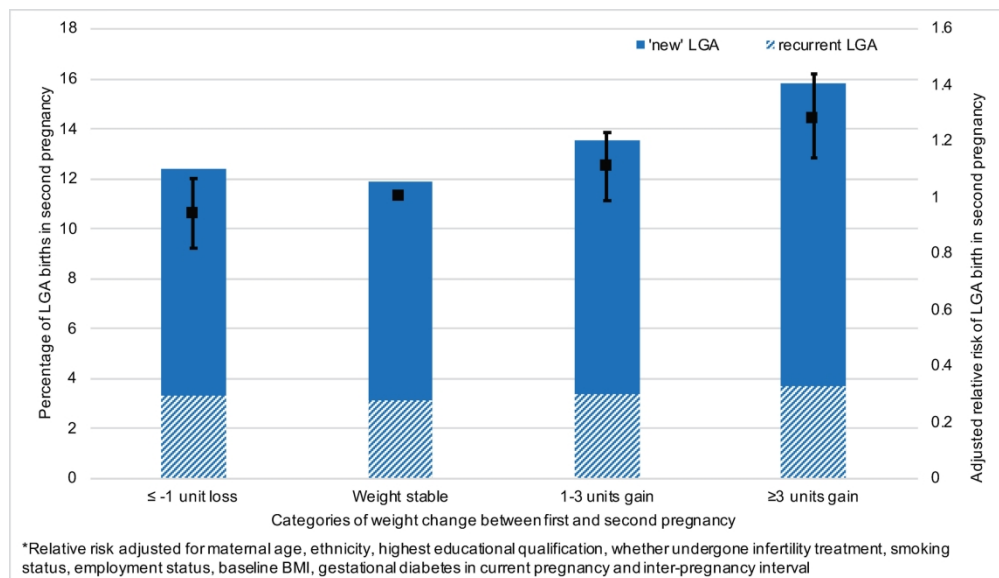

Figure 3: The percentage and risk of large-for-gestational age (LGA) births in second pregnancy stratified by maternal inter-pregnancy weight change categories

222x128mm (300 x 300 DPI)

1  
2  
3  
4  
5  
6  
7  
8  
9  
10  
11  
12  
13  
14  
15  
16  
17  
18  
19  
20  
21  
22  
23  
24  
25  
26  
27  
28  
29  
30  
31  
32  
33  
34  
35  
36  
37  
38  
39  
40  
41  
42  
43  
44  
45  
46  
47  
48  
49  
50  
51  
52  
53  
54  
55  
56  
57  
58  
59  
60

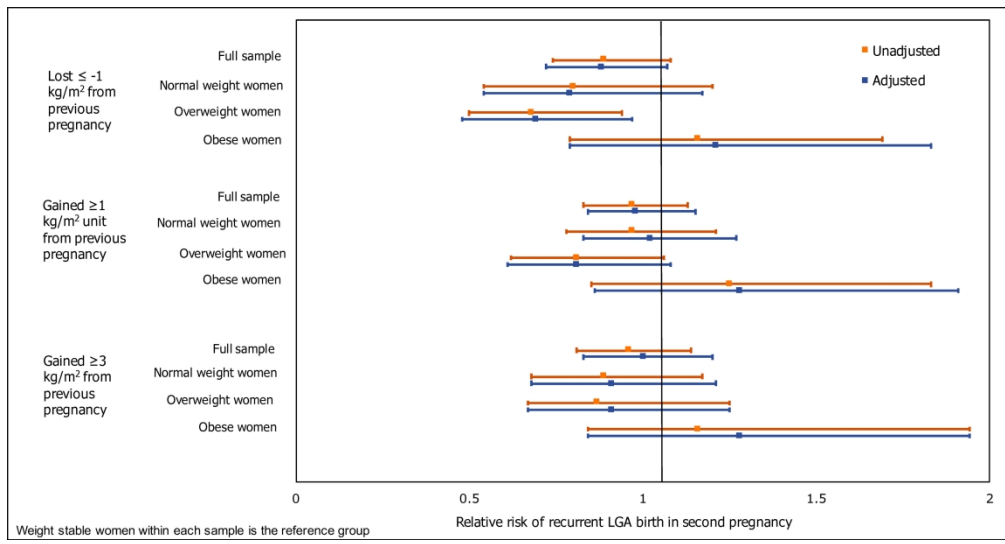

Supplementary Figure 1: Associations between risk of recurrent large-for-gestational age (LGA) birth in the second pregnancy and change in maternal body mass index (BMI) between pregnancies as measured at the first antenatal visit of each pregnancy stratified by BMI category in the first pregnancy

311x165mm (300 x 300 DPI)



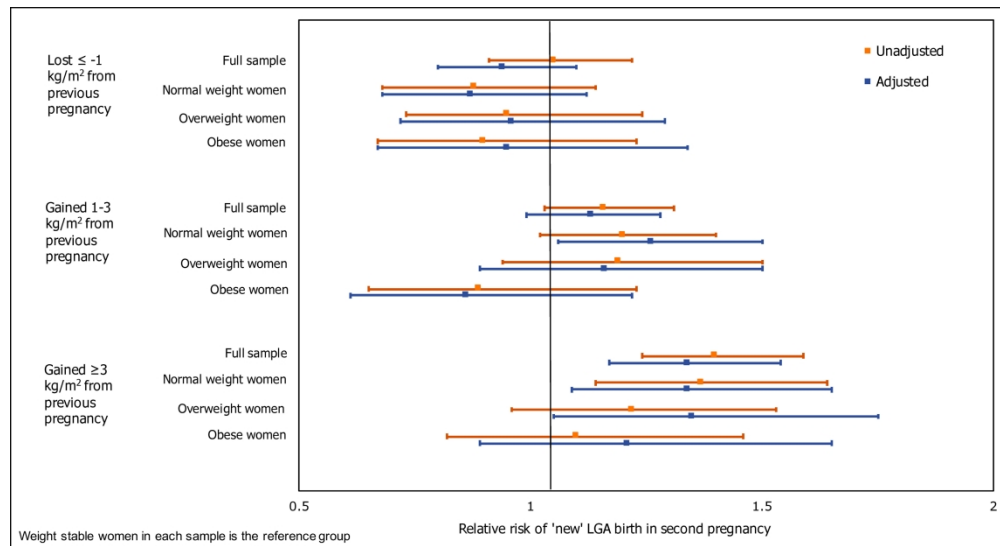

Supplementary Figure 2: Associations between the risk of 'new' large-for-gestational age (LGA) birth in the second pregnancy following a non-LGA birth in the first pregnancy and change in maternal body mass index (BMI) between pregnancies measured at the first antenatal visit of each pregnancy stratified by BMI category in the first pregnancy

310x168mm (300 x 300 DPI)

# Reporting checklist for cohort study.

Based on the STROBE cohort guidelines.

## Instructions to authors

Complete this checklist by entering the page numbers from your manuscript where readers will find each of the items listed below.

Your article may not currently address all the items on the checklist. Please modify your text to include the missing information. If you are certain that an item does not apply, please write "n/a" and provide a short explanation.

Upload your completed checklist as an extra file when you submit to a journal.

In your methods section, say that you used the STROBE cohort reporting guidelines, and cite them as:

von Elm E, Altman DG, Egger M, Pocock SJ, Gøtzsche PC, Vandenbroucke JP. The Strengthening the Reporting of Observational Studies in Epidemiology (STROBE) Statement: guidelines for reporting observational studies.

|                        |     | Reporting Item                                                                                                                  | Page Number |
|------------------------|-----|---------------------------------------------------------------------------------------------------------------------------------|-------------|
| Title                  | #1a | Indicate the study's design with a commonly used term in the title or the abstract                                              | 1 and 2     |
| Abstract               | #1b | Provide in the abstract an informative and balanced summary of what was done and what was found                                 | 2           |
| Background / rationale | #2  | Explain the scientific background and rationale for the investigation being reported                                            | 3-4         |
| Objectives             | #3  | State specific objectives, including any prespecified hypotheses                                                                | 4           |
| Study design           | #4  | Present key elements of study design early in the paper                                                                         | 4           |
| Setting                | #5  | Describe the setting, locations, and relevant dates, including periods of recruitment, exposure, follow-up, and data collection | 4           |
| Eligibility criteria   | #6a | Give the eligibility criteria, and the sources and methods of selection of participants. Describe methods of follow-up.         | 4           |

|    |                  |      |                                                                   |     |
|----|------------------|------|-------------------------------------------------------------------|-----|
| 1  |                  | #6b  | For matched studies, give matching criteria and number of         | n/a |
| 2  |                  |      | exposed and unexposed                                             |     |
| 3  |                  |      |                                                                   |     |
| 4  |                  |      |                                                                   |     |
| 5  | Variables        | #7   | Clearly define all outcomes, exposures, predictors, potential     | 4-5 |
| 6  |                  |      | confounders, and effect modifiers. Give diagnostic criteria, if   |     |
| 7  |                  |      | applicable                                                        |     |
| 8  |                  |      |                                                                   |     |
| 9  |                  |      |                                                                   |     |
| 10 | Data sources /   | #8   | For each variable of interest give sources of data and details of | 4-5 |
| 11 | measurement      |      | methods of assessment (measurement). Describe                     |     |
| 12 |                  |      | comparability of assessment methods if there is more than one     |     |
| 13 |                  |      | group. Give information separately for for exposed and            |     |
| 14 |                  |      | unexposed groups if applicable.                                   |     |
| 15 |                  |      |                                                                   |     |
| 16 |                  |      |                                                                   |     |
| 17 |                  |      |                                                                   |     |
| 18 | Bias             | #9   | Describe any efforts to address potential sources of bias         | n/a |
| 19 |                  |      |                                                                   |     |
| 20 |                  |      |                                                                   |     |
| 21 | Study size       | #10  | Explain how the study size was arrived at                         | 4   |
| 22 |                  |      |                                                                   |     |
| 23 | Quantitative     | #11  | Explain how quantitative variables were handled in the            | 4-5 |
| 24 | variables        |      | analyses. If applicable, describe which groupings were chosen,    |     |
| 25 |                  |      | and why                                                           |     |
| 26 |                  |      |                                                                   |     |
| 27 |                  |      |                                                                   |     |
| 28 | Statistical      | #12a | Describe all statistical methods, including those used to control | 5   |
| 29 | methods          |      | for confounding                                                   |     |
| 30 |                  |      |                                                                   |     |
| 31 |                  |      |                                                                   |     |
| 32 |                  | #12b | Describe any methods used to examine subgroups and                | 5   |
| 33 |                  |      | interactions                                                      |     |
| 34 |                  |      |                                                                   |     |
| 35 |                  |      |                                                                   |     |
| 36 |                  | #12c | Explain how missing data were addressed                           | n/a |
| 37 |                  |      |                                                                   |     |
| 38 |                  | #12d | If applicable, explain how loss to follow-up was addressed        | n/a |
| 39 |                  |      |                                                                   |     |
| 40 |                  |      |                                                                   |     |
| 41 |                  | #12e | Describe any sensitivity analyses                                 | n/a |
| 42 |                  |      |                                                                   |     |
| 43 | Participants     | #13a | Report numbers of individuals at each stage of study—eg           | 5   |
| 44 |                  |      | numbers potentially eligible, examined for eligibility, confirmed |     |
| 45 |                  |      | eligible, included in the study, completing follow-up, and        |     |
| 46 |                  |      | analysed. Give information separately for for exposed and         |     |
| 47 |                  |      | unexposed groups if applicable.                                   |     |
| 48 |                  |      |                                                                   |     |
| 49 |                  |      |                                                                   |     |
| 50 |                  |      |                                                                   |     |
| 51 |                  | #13b | Give reasons for non-participation at each stage                  | n/a |
| 52 |                  |      |                                                                   |     |
| 53 |                  | #13c | Consider use of a flow diagram                                    | n/a |
| 54 |                  |      |                                                                   |     |
| 55 |                  |      |                                                                   |     |
| 56 | Descriptive data | #14a | Give characteristics of study participants (eg demographic,       | 5-6 |
| 57 |                  |      | clinical, social) and information on exposures and potential      |     |
| 58 |                  |      |                                                                   |     |
| 59 |                  |      |                                                                   |     |
| 60 |                  |      |                                                                   |     |

|    |                  |                                                                        |          |
|----|------------------|------------------------------------------------------------------------|----------|
| 1  |                  | confounders. Give information separately for exposed and               |          |
| 2  |                  | unexposed groups if applicable.                                        |          |
| 3  |                  |                                                                        |          |
| 4  |                  | #14b Indicate number of participants with missing data for each        | 13-14    |
| 5  |                  | variable of interest                                                   |          |
| 6  |                  |                                                                        |          |
| 7  |                  | #14c Summarise follow-up time (eg, average and total amount)           | n/a      |
| 8  |                  |                                                                        |          |
| 9  |                  |                                                                        |          |
| 10 | Outcome data     | #15 Report numbers of outcome events or summary measures               | 5-6, 13- |
| 11 |                  | over time. Give information separately for exposed and                 | 14       |
| 12 |                  | unexposed groups if applicable.                                        |          |
| 13 |                  |                                                                        |          |
| 14 |                  |                                                                        |          |
| 15 | Main results     | #16a Give unadjusted estimates and, if applicable, confounder-         | 6-7, 15- |
| 16 |                  | adjusted estimates and their precision (eg, 95% confidence             | 21       |
| 17 |                  | interval). Make clear which confounders were adjusted for and          |          |
| 18 |                  | why they were included                                                 |          |
| 19 |                  |                                                                        |          |
| 20 |                  |                                                                        |          |
| 21 |                  |                                                                        |          |
| 22 |                  | #16b Report category boundaries when continuous variables were         | 4-5, 13- |
| 23 |                  | categorized                                                            | 14       |
| 24 |                  |                                                                        |          |
| 25 |                  |                                                                        |          |
| 26 |                  | #16c If relevant, consider translating estimates of relative risk into | n/a      |
| 27 |                  | absolute risk for a meaningful time period                             |          |
| 28 |                  |                                                                        |          |
| 29 |                  |                                                                        |          |
| 30 | Other analyses   | #17 Report other analyses done—e.g., analyses of subgroups and         | n/a      |
| 31 |                  | interactions, and sensitivity analyses                                 |          |
| 32 |                  |                                                                        |          |
| 33 |                  |                                                                        |          |
| 34 | Key results      | #18 Summarise key results with reference to study objectives           | 7        |
| 35 |                  |                                                                        |          |
| 36 | Limitations      | #19 Discuss limitations of the study, taking into account sources of   | 8-9      |
| 37 |                  | potential bias or imprecision. Discuss both direction and              |          |
| 38 |                  | magnitude of any potential bias.                                       |          |
| 39 |                  |                                                                        |          |
| 40 |                  |                                                                        |          |
| 41 | Interpretation   | #20 Give a cautious overall interpretation considering objectives,     | 9        |
| 42 |                  | limitations, multiplicity of analyses, results from similar studies,   |          |
| 43 |                  | and other relevant evidence.                                           |          |
| 44 |                  |                                                                        |          |
| 45 |                  |                                                                        |          |
| 46 | Generalisability | #21 Discuss the generalisability (external validity) of the study      | 8-9      |
| 47 |                  | results                                                                |          |
| 48 |                  |                                                                        |          |
| 49 |                  |                                                                        |          |
| 50 | Funding          | #22 Give the source of funding and the role of the funders for the     | 10       |
| 51 |                  | present study and, if applicable, for the original study on which      |          |
| 52 |                  | the present article is based                                           |          |
| 53 |                  |                                                                        |          |
| 54 |                  |                                                                        |          |
| 55 |                  |                                                                        |          |

The STROBE checklist is distributed under the terms of the Creative Commons Attribution License CC-BY. This checklist was completed on 22. August 2018 using <http://www.goodreports.org/>, a tool made by the [EQUATOR Network](#) in collaboration with [Penelope.ai](#)
